# Supplementary material
Source: PubMed Central journal article supplement (PMC2718539)

## SUPPORTING INFORMATION

### Synthesis of Copolymers with Alternating ROMP (AROMP)

Airong Song, Kathlyn A. Parker\* and Nicole S. Sampson\*

*Department of Chemistry, Stony Brook University, Stony Brook, NY 11794-3400*

#### Table of Contents

|                                                                                    |    |
|------------------------------------------------------------------------------------|----|
| <b>General Information</b> -----                                                   | 4  |
| <b>Cyclobut-1-enecarboxylic acid</b> -----                                         | 4  |
| <b>Methyl cyclobut-1-enecarboxylate, (2a)</b> -----                                | 5  |
| <b>Phenyl cyclobut-1-enecarboxylate, (2b)</b> -----                                | 5  |
| <b>4-(Methoxymethyl)cyclohexene, (4b)</b> -----                                    | 6  |
| <b>PDI (Polydispersity Index) Determination</b> -----                              | 7  |
| <b>General Procedure for Alternating ROMP</b> -----                                | 7  |
| <b>(2a-4a)<sub>10</sub></b> :-----                                                 | 8  |
| <b>(2a-4a)<sub>20</sub></b> :-----                                                 | 8  |
| <b>(2a-4a)<sub>50</sub></b> :-----                                                 | 8  |
| <b>(2a-4a)<sub>100</sub></b> :-----                                                | 8  |
| <b>(2a-4a)<sub>200</sub></b> :-----                                                | 9  |
| <b>(2b-4a)<sub>20</sub></b> :-----                                                 | 9  |
| <b>(2a-4b)<sub>20</sub></b> :-----                                                 | 10 |
| <b>(2a-4a-D<sub>10</sub>)<sub>20</sub> (24 equiv. of 4a-D<sub>10</sub>)</b> -----  | 10 |
| <b>(2a-4a-D<sub>10</sub>)<sub>20</sub> (160 equiv. of 4a-D<sub>10</sub>)</b> ----- | 11 |
| <b>(4a)<sub>20</sub></b> -----                                                     | 11 |

|                                                                                                                    |           |
|--------------------------------------------------------------------------------------------------------------------|-----------|
| (2a) <sub>10</sub>                                                                                                 | 11        |
| (2a <sub>1</sub> ) (7a and 7b):                                                                                    | 12        |
| (2a-4a) <sub>3</sub> :                                                                                             | 12        |
| (2a-4a) <sub>10</sub> :                                                                                            | 13        |
| (2a-4a) <sub>20</sub> :                                                                                            | 14        |
| <b>Table S1</b>                                                                                                    | <b>15</b> |
| <b>References</b>                                                                                                  | <b>15</b> |
| <b>Figure S1. <sup>1</sup>H-NMR spectra of alternating ROMP polymers.</b>                                          | <b>16</b> |
| <b>Figure S2. <sup>13</sup>C-APT-NMR spectrum of alternating ROMP polymer (2a-4a)<sub>20</sub>.</b>                | <b>17</b> |
| <b>Figure S3. <sup>1</sup>H-<sup>1</sup>H-gCOSY-NMR spectrum of alternating ROMP polymer (2a-4a)<sub>20</sub>.</b> | <b>18</b> |
| <b>Figure S4. Kinetic NMR-monitoring experiment of (2a-4a)<sub>100</sub>.</b>                                      | <b>19</b> |
| <b>Figure S5. <sup>1</sup>H-NMR spectrum of cyclic polymer cyc-(2a-4a-D<sub>10</sub>)<sub>20</sub></b>             | <b>20</b> |
| <b>Figure S6. GPC traces of (2a-4a)<sub>100</sub> and (2a-4a)<sub>200</sub></b>                                    | <b>21</b> |
| <b>Figure S7. Bimodal peak fitting of GPC trace of (2a-4a)<sub>200</sub></b>                                       | <b>22</b> |
| <b><sup>1</sup>H-NMR spectrum of 2a</b>                                                                            | <b>23</b> |
| <b><sup>13</sup>C-NMR spectrum of 2a</b>                                                                           | <b>24</b> |
| <b><sup>1</sup>H-NMR spectrum of 2b</b>                                                                            | <b>25</b> |
| <b><sup>13</sup>C-NMR spectrum of 2b</b>                                                                           | <b>26</b> |
| <b><sup>1</sup>H-NMR spectrum of 4b</b>                                                                            | <b>27</b> |
| <b><sup>13</sup>C-NMR spectrum of 4b</b>                                                                           | <b>28</b> |
| <b><sup>1</sup>H-NMR spectrum of (2a-4a)<sub>3</sub></b>                                                           | <b>29</b> |
| <b><sup>13</sup>C-NMR spectrum of (2a-4a)<sub>3</sub></b>                                                          | <b>30</b> |

|                                                                                                     |           |
|-----------------------------------------------------------------------------------------------------|-----------|
| <b><math>^1\text{H}</math>-NMR spectrum of (2a-4a)<sub>10</sub></b>                                 | <b>31</b> |
| <b><math>^1\text{H}</math>-NMR spectrum of (2a-4a)<sub>20</sub></b>                                 | <b>32</b> |
| <b><math>^{13}\text{C}</math>-NMR spectrum of (2a-4a)<sub>20</sub></b>                              | <b>33</b> |
| <b><math>^{13}\text{C}</math>-APT-NMR spectrum of (2a-4a)<sub>20</sub></b>                          | <b>34</b> |
| <b><math>^1\text{H}</math>-<math>^1\text{H}</math>-gCOSY-NMR spectrum of (2a-4a)<sub>20</sub></b>   | <b>35</b> |
| <b><math>^1\text{H}</math>-<math>^{13}\text{C}</math>-HMQC-NMR spectrum of (2a-4a)<sub>20</sub></b> | <b>36</b> |
| <b><math>^1\text{H}</math>-NMR spectrum of (2a-4a)<sub>50</sub></b>                                 | <b>37</b> |
| <b><math>^1\text{H}</math>-NMR spectrum of (2a-4a)<sub>100</sub></b>                                | <b>38</b> |
| <b><math>^{13}\text{C}</math>-NMR spectrum of (2a-4a)<sub>100</sub></b>                             | <b>39</b> |
| <b><math>^1\text{H}</math>-NMR spectrum of (2a-4a)<sub>200</sub></b>                                | <b>40</b> |
| <b><math>^1\text{H}</math>-NMR spectrum of (2a-4b)<sub>20</sub></b>                                 | <b>41</b> |
| <b><math>^1\text{H}</math>-NMR spectrum of (2a-4a-D<sub>10</sub>)<sub>20</sub></b>                  | <b>42</b> |
| <b><math>^1\text{H}</math>-NMR spectrum of (2b-4a)<sub>20</sub></b>                                 | <b>43</b> |
| <b><math>^1\text{H}</math>-NMR spectrum of 7a and 7b</b>                                            | <b>44</b> |
| <b><math>^{13}\text{C}</math>-NMR spectrum of 7a and 7b</b>                                         | <b>45</b> |
| <b><math>^1\text{H}</math>-NMR spectrum of cyc-(2a-4a-D<sub>10</sub>)<sub>20</sub></b>              | <b>46</b> |

## General Information

All reactions were performed under an N<sub>2</sub> or Ar atmosphere. CH<sub>2</sub>Cl<sub>2</sub> was dried in a GlassContour solvent pushstill system. CD<sub>2</sub>Cl<sub>2</sub> was degassed before use for reactions. Second generation Grubbs' catalyst [(H<sub>2</sub>IMes)(PCy<sub>3</sub>)Cl<sub>2</sub>Ru=CHPh], ethyl 1-bromocyclobutane-carboxylate and 3-cyclohexene-1-methanol **6** were purchased from Aldrich (Cat #: 56974-7, 19729-7 and 162167). Cyclohexene **4a** was purchased from Fisher Scientific. Cyclohexene-D<sub>10</sub> **4a-D<sub>10</sub>** was purchased from CDN Isotope Inc. (Cat #: D0173). The synthesis of precatalyst **1** was performed with the procedure of Love, J.A. et al.<sup>1</sup> Mallinckrodt silica gel 60 (230-400 mesh) was used for column chromatography. Aluminum TLC (thin layer chromatography) plates were silica gel 60 (F254). <sup>1</sup>H NMR spectra were reported as chemical shift in ppm (multiplicity, coupling constant in Hz, and integration). <sup>13</sup>C NMR spectra were reported as chemical shift in ppm. The solvent peak was used as an internal reference. LC-MS spectra were acquired on a Waters ACQUITY Ultra Performance Liquid Chromatography system with an SQD detector and using a 10 cm×2.1 mm ACQUITY™ 1.7 μm column (Waters Corp, Milford, USA) with elution by a linear gradient of 20-100% *B* at 0.5 mL/min, where *A* = water and *B* = methanol. The molecular weights of the polymers were assessed by gel permeation chromatography (Phenogel 5 μ MXL GPC column, Phenomenex) eluting with THF.

## Cyclobut-1-enecarboxylic acid<sup>2,3</sup>

Cyclobut-1-enecarboxylic acid was prepared according to the procedure for the preparation of 3,3-dimethylcyclobutene carboxylic acid as described by Campbell et al.<sup>2</sup> with minor modifications. KOH (6.00 g, 107 mmol) and toluene (90 mL) were mixed and then heated to

reflux until the KOH dissolved. Ethyl 1-bromocyclobutanecarboxylate (4.90 g, 23.7 mmol) was added dropwise without heating. The reaction mixture was heated at reflux for 1 h, then cooled to RT. Cold water (60 mL) was added, the aqueous layer was washed with pentane (2 x 40 mL), and the pH was adjusted to 2.5 with 30% aq H<sub>2</sub>SO<sub>4</sub>. The product was then extracted from the aqueous layer with Et<sub>2</sub>O (4 x 40 mL) and dried over anhydrous Na<sub>2</sub>SO<sub>4</sub>. The Et<sub>2</sub>O was evaporated to give a yellow oil. The oil was dissolved in pentane (50 mL) and the upper layer was separated from the lower layer. The upper layer was cooled in an acetone-dry ice bath and stirred for 20 min. The resulting precipitate was filtered and dried under vacuum (1.14 g, 49% yield). The dried solid was stored at -20 °C to prevent decomposition. <sup>1</sup>H-NMR (400 MHz, CDCl<sub>3</sub>) δ 10.23 (bs, 1H), 6.94 (t, J=1.2 Hz, 1H), 2.76 (t, J=3.2 Hz, 2H), 2.51 (td, J=3.2 Hz, 1.2 Hz, 2H). <sup>13</sup>C-NMR (100 MHz, CDCl<sub>3</sub>) δ 167.5, 150.1, 138.4, 29.1, 27.5.

### **Methyl cyclobut-1-enecarboxylate, (2a)<sup>4,5</sup>**

The ester **2a** was prepared according to the literature.<sup>4,5</sup> <sup>1</sup>H-NMR (400 MHz, CDCl<sub>3</sub>) δ 6.74 (s, 1H), 3.68 (s, 3H), 2.69 (m, 2H), 2.46 (m, 2H). <sup>13</sup>C-NMR (150 MHz, CDCl<sub>3</sub>) δ 162.7, 146.5, 138.8, 51.2, 29.3, 27.3.

### **Phenyl cyclobut-1-enecarboxylate, (2b)**

Cyclobut-1-enecarboxylic acid (0.51 mmol, 50 mg) was dissolved in 0.5 mL dry CH<sub>2</sub>Cl<sub>2</sub>. The solution was cooled to 0 °C and oxalyl dichloride (0.51 mmol, 43 μL) was added. The temperature of the solution was raised to rt, and the mixture was allowed to react for 1 h. The solvent was evaporated to generate a viscous oil. Phenol (0.51 mmol, 48 mg) and triethylamine

(1.02 mmol, 142  $\mu$ L) were dissolved in 0.5 mL dry  $\text{CH}_2\text{Cl}_2$ , and the solution was stirred at 0  $^\circ\text{C}$  for 45 min before being added to a vial containing the cyclobut-1-enecarboxylic chloride. The reaction mixture was stirred for 16 h at rt. The reaction was quenched with 1 N HCl, and was extracted with  $\text{CH}_2\text{Cl}_2$  (30 mL). The  $\text{CH}_2\text{Cl}_2$  solution was washed with 5 %  $\text{NaHCO}_3$  ( $2 \times 10$  mL), dried over  $\text{Na}_2\text{SO}_4$ , concentrated by rotary evaporation, and then purified by flash column chromatography (100%  $\text{CH}_2\text{Cl}_2$ ) to yield **2b** as a colorless oil (42 mg, 47%).  $^1\text{H-NMR}$  (100 MHz)  $\delta$  7.42 (m, 2H), 7.28 (m, 1H), 7.14 (m, 2H), 7.02 (s, 1H), 2.88 (t,  $J=3.0$  Hz, 2H), 2.60 (m, 2H).  $^{13}\text{C-NMR}$  (400 MHz)  $\delta$  160.5, 150.8, 149.2, 138.3, 129.6, 125.9, 121.8, 29.5, 27.7. HRMS (EI) calcd. for  $\text{C}_{11}\text{H}_{10}\text{O}_2$   $[\text{M}]^+$  174.0679, found 174.0681.

#### **4-(Methoxymethyl)cyclohexene, (4b)**

3-Cyclohexene-1-methanol **6** (8.92 mmol, 1.00 g) and NaH (17.8 mmol, 428 mg) were mixed in THF (30 mL) at rt, and the THF solution was stirred for 1 h at rt. MeI (17.8 mmol, 1.10 mL) was added slowly into the above THF solution. After stirring for 16 h at rt, the solution was diluted with water (30 mL), and then was extracted with diethyl ether ( $2 \times 30$  mL). The organic layer was dried over  $\text{Na}_2\text{SO}_4$ , was concentrated by rotary evaporation, and then was distilled to generate the final product **4b** as a colorless liquid (460 mg, 41%).  $^1\text{H-NMR}$  (500 MHz)  $\delta$  5.68 (m, 2H), 3.36 (s, 3H), 3.28 (dd,  $J=6.5$  Hz,  $J=4$  Hz), 2.06-2.14 (m, 3H), 1.92 (m, 1H), 1.83 (m, 1H), 1.75 (m, 1H), 1.29 (m, 1H).  $^{13}\text{C-NMR}$  (100 MHz)  $\delta$  127.2, 126.1, 78.0, 58.9, 34.0, 28.6, 25.8, 24.7. LC-MS (APCI): peak time = 1.59 min,  $M/z$  calcd for  $\text{C}_8\text{H}_{15}\text{O}$   $[\text{M}+\text{H}]^+$  127.11, found 127.10.

## **PDI (Polydispersity Index) determination**

Polymers were dissolved in THF (0.5 mg/mL). An aliquot (100  $\mu$ L) of the polymer solution was analyzed by gel permeation chromatography using a Phenogel column (300 x 7.80 mm, 5  $\mu$ m, linear mixed bed, 0-40k MW range). Elution was performed at 0.7 mL/min with THF and detection at 220 nm at 30 °C. Narrowly dispersed polystyrene standards from Aldrich were used as molecular weight calibrants. The number average and weighted average molecular weights were calculated from the chromatogram.

## **General Procedure for AROMP**

An NMR tube was evacuated under high vacuum for 15 min, and then was purged with Ar gas for another 15 min. Under an Ar atmosphere, a solution of monomer **A** (1-cyclobutenecarboxylate ester) in  $\text{CD}_2\text{Cl}_2$  (300  $\mu$ L) was added to the NMR tube. Then a solution of precatalyst  $(\text{H}_2\text{IMes})(3\text{-Br-Py})_2\text{Cl}_2\text{Ru}=\text{CHPh}$  **1** in  $\text{CD}_2\text{Cl}_2$  (300  $\mu$ L) was added to the NMR tube. After complete mixing of the solution, the NMR tube was spun for 4-30 min at 25 °C in the NMR spectrometer (400, 500 or 600 MHz) until the precatalyst had reacted. Then monomer **B** (cyclohexene derivatives) in  $\text{CD}_2\text{Cl}_2$  (300  $\mu$ L) was added to the NMR tube. After all of monomer **A** was converted, the reaction was quenched with ethylvinyl ether (50  $\mu$ L) and was stirred for 1 h.

### **(2a-4a)<sub>10</sub>:**

Cyclobutene **2a** (0.06 mmol), cyclohexene **4a** (0.12 mmol) and **1** (0.006 mmol) were mixed in  $\text{CD}_2\text{Cl}_2$  (600  $\mu$ L) in an NMR tube. The reaction was maintained for 3 h to reach 98%

completion. Degree of polymerization (DP) = 98.  $M_n^{\text{calc}} = 2044$ .  $M_n^{\text{GPC}} = 376$ .  $M_w^{\text{GPC}} = 962$ . PDI = 2.6.

**(2a-4a)<sub>20</sub>:**

Cyclobutene **2a** (0.12 mmol), cyclohexene **4a** (0.24 mmol) and **1** (0.006 mmol) were mixed in CD<sub>2</sub>Cl<sub>2</sub> (600 μL) in an NMR tube. The reaction was maintained for 3 h to reach 98% completion. DP = 98.  $M_n^{\text{calc}} = 3984$ .  $M_n^{\text{GPC}} = 668$ .  $M_w^{\text{GPC}} = 1816$ . PDI = 2.7.

**(2a-4a)<sub>50</sub>:**

Cyclobutene **2a** (0.30 mmol), cyclohexene **4a** (0.60 mmol) and **1** (0.006 mmol) were mixed in CD<sub>2</sub>Cl<sub>2</sub> (600 μL) in an NMR tube. The reaction was maintained for 3 h to reach 98% completion. DP = 98.  $M_n^{\text{calc}} = 9804$ .  $M_n^{\text{GPC}} = 652$ .  $M_w^{\text{GPC}} = 2634$ . PDI = 4.0.

**(2a-4a)<sub>100</sub>:**

Cyclobutene **2a** (0.60 mmol), cyclohexene **4a** (1.20 mmol) and **1** (0.006 mmol) were mixed in CD<sub>2</sub>Cl<sub>2</sub> (600 μL) in an NMR tube. The reaction was maintained for 3 h to reach 97% completion. The crude solution was evaporated to remove solvent, and the residue was purified by flash column chromatography (acetone:CH<sub>2</sub>Cl<sub>2</sub>/3:97) to provide polymer **(2a-4a)<sub>100</sub>** (72 mg, 62%). DP = 97. According to GPC chromatographic analysis, the copolymer had a bimodal molecular weight distribution (Figure S6).  $M_n^{\text{calc}} = 19504$ .  $M_n^{\text{GPC}} = 1869$ .  $M_w^{\text{GPC}} = 10872$ . PDI = 5.8.



**(2a-4a)<sub>200</sub>:**

Cyclobutene **2a** (0.60 mmol), cyclohexene **4a** (1.20 mmol) and **1** (0.003 mmol) were mixed in CD<sub>2</sub>Cl<sub>2</sub> (600 μL) in an NMR tube. The reaction was maintained for 6 h to reach 73% completion. The crude solution was evaporated to remove solvents, and was purified by flash column chromatography (acetone:CH<sub>2</sub>Cl<sub>2</sub>/3:97) to generate polymer **(2a-4a)<sub>200</sub>** (48 mg, 41%). DP = 74. According to GPC chromatographic analysis, the copolymer had a bimodal molecular weight distribution (Figure S6).  $M_n^{\text{calc}} = 29010$ . The overall GPC result:  $M_n^{\text{GPC}} = 7749$ ,  $M_w^{\text{GPC}} = 18501$ , PDI = 2.4. The individual peaks were fitted using OriginPro 7.5 (OriginLab Corp.), and the molecular weight and PDI data of each peak were calculated (Figure S7). Peak **A**:  $M_n^{\text{GPC}} = 17703$ .  $M_w^{\text{GPC}} = 20388$ . PDI = 1.2. Peak **B**:  $M_n^{\text{GPC}} = 1038$ .  $M_w^{\text{GPC}} = 3539$ . PDI = 3.4.

Cyclobutene **2a** (0.60 mmol), cyclohexene **4a** (1.20 mmol) and **1** (0.003 mmol) were mixed in CD<sub>2</sub>Cl<sub>2</sub> (600 μL) in an NMR tube. The reaction was maintained for 1.5 h and quenched at 50% completion. DP = 50. According to GPC chromatographic analysis, the copolymer had a bimodal molecular weight distribution (Figure S6).  $M_n^{\text{calc}} = 29010$ . The overall GPC result:  $M_n^{\text{GPC}} = 3201$ .  $M_w^{\text{GPC}} = 18106$ . PDI = 5.7. Peak **A**:  $M_n^{\text{GPC}} = 25088$ .  $M_w^{\text{GPC}} = 28697$ . PDI = 1.1. Peak **B**:  $M_n^{\text{GPC}} = 1383$ .  $M_w^{\text{GPC}} = 2143$ . PDI = 1.5.

**(2b-4a)<sub>20</sub>:**

Cyclobutene **2b** (0.12 mmol), cyclohexene **4a** (0.24 mmol) and **1** (0.006 mmol) were mixed in CD<sub>2</sub>Cl<sub>2</sub> (600 μL) in an NMR tube. The reaction was maintained for 4 h to reach 96% completion. The solvent was removed from the crude mixture in vacuo and the residue was

purified by flash column chromatography (100% CH<sub>2</sub>Cl<sub>2</sub>) to provide polymer **(2b-4a)<sub>20</sub>** (16 mg, 55%). <sup>1</sup>H (500 MHz, CD<sub>2</sub>Cl<sub>2</sub>) δ 7.44-6.95 (m, 125H), 6.40 (m, 0.5H+0.5H), 6.31 (b, 0.5H), 6.03 (b, 1H), 5.78 (b, 0.5H), 5.60-5.40 (b, m, 38H), 5.03 (m, 2H), 2.66-2.10 (b, m, 160H), 1.73-1.42 (b, m, 80H). DP = 96.  $M_n^{\text{calc}} = 5224$ .  $M_n^{\text{GPC}} = 1572$ .  $M_w^{\text{GPC}} = 3302$ . PDI = 2.1.

**(2a-4b)<sub>20</sub>:**

Cyclobutene **2a** (0.12 mmol), cyclohexene **4b** (0.24 mmol) and **1** (0.006 mmol) were mixed in CD<sub>2</sub>Cl<sub>2</sub> (600 μL) in an NMR tube. The reaction was maintained for 4 h to reach 95% completion. The solvent was removed from the crude mixture in vacuo and the residue was purified by flash column chromatography (100% CH<sub>2</sub>Cl<sub>2</sub>) to generate polymer **(2a-4b)<sub>20</sub>** (15 mg, 59%). <sup>1</sup>H (500 MHz, CD<sub>2</sub>Cl<sub>2</sub>) δ 7.41-7.21 (m, 5H), 6.83 (m, 20H), 6.42 (m, 1H), 6.27 (m, 1H), 5.83 (m, 1H), 5.42 (m, 38H), 5.02 (m, 2H), 3.72 (bs, 60H), 3.34-3.17 (m, 100H), 2.47-2.06 (m, 160H), 1.78-1.24 (m, 60H). DP = 95.  $M_n^{\text{calc}} = 4264$ .  $M_n^{\text{GPC}} = 1506$ .  $M_w^{\text{GPC}} = 3719$ . PDI = 2.5.

**(2a-4a-D<sub>10</sub>)<sub>20</sub> (24 equiv. of 4a-D<sub>10</sub>):**

Cyclobutene **2a** (0.12 mmol), cyclohexene **4a-D<sub>10</sub>** (0.144 mmol) and **1** (0.006 mmol) were mixed in CD<sub>2</sub>Cl<sub>2</sub> (600 μL) in an NMR tube. The reaction was maintained for 3 h to reach 97% completion. The solvent was evaporated, and the residue was purified by flash column chromatography (acetone:CH<sub>2</sub>Cl<sub>2</sub>/4:96) to provide polymer **(2a-4a-D<sub>10</sub>)<sub>20</sub>** as a sticky oil (17.4 mg, 71%). <sup>1</sup>H (500 MHz, CD<sub>2</sub>Cl<sub>2</sub>) δ 7.41-7.21 (m, 5H), 6.78 (t, J=2.5 Hz, 2H), 6.39 (m, 1H), 6.27 (m, 1H), 5.43 (m, 20H), 5.06-5.02 (d, J=2.0 Hz, 1H), 4.98-4.97 (d, J=0.5 Hz, 1H), 3.72 (s,

60H), 2.36-2.09 (m, 80H). Polymer **(2a-4a-D10)<sub>20</sub>** was further purified by flash chromatography (acetone:CH<sub>2</sub>Cl<sub>2</sub>/4:96) to provide cyclic polymer **cyc-(2a-4a-D10)<sub>20</sub>** as a sticky oil (3.3 mg). Polymer **cyc-(2a-4a-D10)<sub>20</sub>** was characterized by <sup>1</sup>H-NMR spectroscopy and the structures are shown below. <sup>1</sup>H-NMR (500 MHz, CDCl<sub>3</sub>) δ 6.84 (t, J=1.0 Hz, 1H) 5.48-5.36 (m, 5H), 3.75 (m, 18H), 2.47-2.12 (m, 24H).

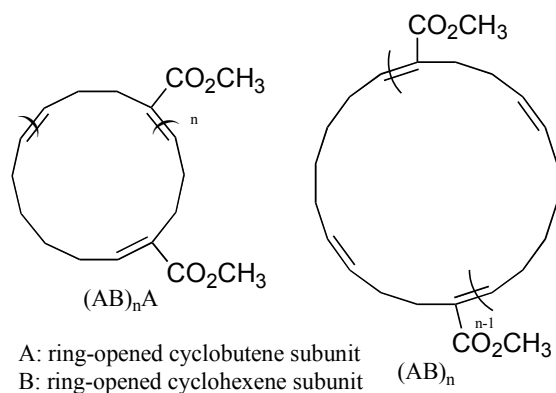

**(2a-4a-D10)<sub>20</sub> (160 equiv. of 4a-D10):**

Cyclobutene **2a** (0.12 mmol), cyclohexene **4a-D10** (0.96 mmol) and **1** (0.006 mmol) were mixed in CD<sub>2</sub>Cl<sub>2</sub> (600 μL) in an NMR tube. The reaction was maintained for 3 h to reach 97% completion.

**(4a)<sub>20</sub>:**

Cyclohexene **4a** (0.12 mmol) and **1** (0.006 mmol) were mixed in CD<sub>2</sub>Cl<sub>2</sub> (600 μL) in an NMR tube. No ROMP or ROM was observed.

**(2a)<sub>10</sub>:**

Methyl cyclobut-1-enecarboxylate **2a** (0.06 mmol) and **1** (0.006 mmol) were mixed in

CD<sub>2</sub>Cl<sub>2</sub> (600 μL) in an NMR tube. The reaction was monitored for 5 h and only reaction of 10% of **2a** was observed.

### Preparative Scale AROMP

#### (2a<sub>1</sub>): (7a and 7b)

A solution of **2a** (40.0 mg, 0.357 mmol) in dry CH<sub>2</sub>Cl<sub>2</sub> (4 mL) was added to a solution of precatalyst **1** (474 mg, 0.536 mmol) in dry CH<sub>2</sub>Cl<sub>2</sub> (4 mL) at rt. The solution was stirred at rt for 20 h and ethylvinyl ether (5 mL, 52.2 mmol) was added to the reaction mixture. After 60 min, the solvent was evaporated and the residue was purified by silica column chromatography with CH<sub>2</sub>Cl<sub>2</sub>. The purified fractions were evaporated to afford the products **7a** (*Z*) and **7b** (*E*) (42.1 mg, 55%) in a 1:2.3 molar ratio. <sup>1</sup>H-NMR (600 MHz, CD<sub>2</sub>Cl<sub>2</sub>) 1-mer **7a** *Z*-isomer δ 7.36-7.19 (m, 5H), 6.47 (d, J=12.6 Hz, 1H), 6.15 (s, 1H), 5.68 (dt, J=11.4, 7.8 Hz, 1H), 5.60 (s, 1H), 3.72 (s, 3H), 2.50 (m, 2H), 2.43 (m, 2H). 1-mer **7b** *E*-isomer δ 7.36-7.19 (m, 5H), 6.42 (d, J=16.2 Hz, 1H), 6.25 (dt, J=22.8, 6.0 Hz, 1H), 6.17 (s, 1H), 5.60 (s, 1H), 3.75 (s, 3H), 2.50 (m, 2H), 2.43 (m, 2H). <sup>13</sup>C-NMR (100 MHz, CD<sub>2</sub>Cl<sub>2</sub>) 1-mer **7a** *Z*-isomer δ 167.9, 140.6, 138.1, 132.1, 130.8, 130.0, 129.3, 128.6, 127.2, 125.5, 52.2, 32.6, 28.0. 1-mer **7b** *E*-isomer δ 168.0, 140.7, 138.1, 131.0, 130.3, 129.0, 128.7, 127.5, 126.5, 52.2, 32.4, 32.3. LC-MS (APCI): peak time=2.18 min, M/Z calcd for C<sub>14</sub>H<sub>16</sub>O<sub>2</sub> [M+H]<sup>+</sup> 217.12, found 217.21.

#### (2a-4a)<sub>3</sub>:

Cyclobutene **2a** (0.28 mmol, 31 mg) and **1** (0.093 mmol, 82 mg) were mixed in CH<sub>2</sub>Cl<sub>2</sub> (2 mL) and stirred for 3 h at rt. Then cyclohexene **4a** (0.56 mmol, 56 μL) was added to the

solution, which was stirred for 3 h. The reaction was quenched with ethylvinyl ether (500  $\mu$ L) and was stirred for 1 h. The solvent was evaporated, and the residue was purified by flash column chromatography (acetone:CH<sub>2</sub>Cl<sub>2</sub>/4:96) to provide polymer (**2a-4a**)<sub>3</sub> as a sticky oil (47 mg, 74%). <sup>1</sup>H-NMR (125 MHz, CD<sub>2</sub>Cl<sub>2</sub>)  $\delta$  7.35-7.21 (m, 5H), 6.80 (m, 6H), 6.42 (d, J=16 Hz, 1H), 6.26 (m, 1H), 5.84 (b, 1H), 5.44 (b, 4 H), 5.04 (d, J=17 Hz, 1H), 4.97 (d, J=15 Hz, 1H), 3.73 (b, 9H), 2.61-2.04 (b, 24H), 1.54 (b, 12H). <sup>13</sup>C (500 MHz, CD<sub>2</sub>Cl<sub>2</sub>)  $\delta$  170.70 (m), 146.00-145.08 (m), 134.30-132.03 (m), 131.10, 130.77, 129.51, 128.53, 127.51, 126.91, 54.00, 36.20-34.11 (m), 32.34-28.48 (m).

**(2a-4a)<sub>10</sub>:**

Cyclobutene **2a** (0.23 mmol, 26 mg) and **1** (0.024 mmol, 21 mg) were mixed in CH<sub>2</sub>Cl<sub>2</sub> (2.3 mL) and stirred for 25 min at rt. Then cyclohexene **4a** (0.47 mmol, 47  $\mu$ L) was added to the solution, which was stirred for 4 h. The reaction was quenched with ethylvinyl ether (350  $\mu$ L), and was stirred for 1 h. The solvent was evaporated, and the residue was purified by flash column chromatography (acetone:CH<sub>2</sub>Cl<sub>2</sub>/1:99) to provide polymer (**2a-4a**)<sub>10</sub> as a sticky oil (32 mg, 71 %). <sup>1</sup>H-NMR (500 MHz, CD<sub>2</sub>Cl<sub>2</sub>)  $\delta$  7.41-7.21 (m, 5H), 6.77 (b, 10H), 6.41 (d, J=15.5 Hz, 1H), 6.26 (d, J=16.0 Hz, 1H), 5.84 (b, 1H), 5.49 (b, 18H), 5.04 (d, J=17.0 Hz, 1H), 4.97 (d, J= 10.0 Hz, 1H), 3.72 (s, 30H), 2.56- 2.02 (b, m, 80H), 1.46 (b, 40H). The broad signal centered at 7.29 ppm was assigned to the phenyl group. All the internal trisubstituted olefinic protons exhibited a broad signal centered at 6.78 ppm, which confirmed all the internal trisubstituted olefin bonds carried the *E*-configuration. All the internal disubstituted olefinic protons also showed a broad signal centered at 5.39 ppm. The peaks at 5.87 ppm and 5.02 ppm

correspond to the terminal vinyl protons, while the peaks at 6.42 ppm and 6.30 ppm could be assigned to the two styrenyl olefinic protons with *E*-configuration. The relative intensities of all these signals were (5: 11: 18: 1: 1: 2: 1) (7.29, 6.78, 5.39, 6.42, 6.30, 5.02, 5.89 ppm), which clearly indicated that polymer (**2a-4a**)<sub>10</sub> contained nearly equal amounts of repeating units A and B generated from monomers **2a** and **4a**, respectively.

**(2a-4a)<sub>20</sub>:**

Cyclobutene **2a** (0.47 mmol, 53 mg) and **1** (0.024 mmol, 21 mg) were mixed in CH<sub>2</sub>Cl<sub>2</sub> (2 mL) and stirred for 25 min at rt. Then cyclohexene **4a** (0.94 mmol, 95 μL) was added to the solution, which was stirred for 5 h thereafter. The reaction was quenched with ethylvinyl ether (350 μL), and was stirred for 1 h. The solvent was evaporated, and the residue was purified by flash column chromatography (acetone:CH<sub>2</sub>Cl<sub>2</sub>/4:96) to provide polymer (**2a-4a**)<sub>20</sub> as a sticky oil (67 mg, 74%). Polymer (**2a-4a**)<sub>20</sub> was characterized by <sup>1</sup>H-NMR, <sup>13</sup>C-NMR, gHMQC, <sup>1</sup>H -<sup>1</sup>H gCOSY and <sup>13</sup>C-APT spectroscopy (Table S1).

**Table S1.**  $^1\text{H-NMR}$ ,  $^{13}\text{C-NMR}$ ,  $^1\text{H-}^1\text{H gCOSY}$ ,  $^{13}\text{C-APT}$ , and  $^1\text{H-}^{13}\text{C gHMQC}$  data for compound (**2a-4a**)<sub>20</sub> (500, 100, 500, 100 and 500/125 MHz, CD<sub>2</sub>Cl<sub>2</sub>).<sup>a</sup>

| No.   | $\delta_{\text{H}}$ (J in Hz) | $\delta_{\text{C}}$ | $^1\text{H-}^1\text{H gCOSY}$ | $^{13}\text{C-APT}$ |
|-------|-------------------------------|---------------------|-------------------------------|---------------------|
| 1     | 4.97 d (15)<br>5.04 d (17)    |                     |                               |                     |
| 2     | 5.79 b                        | 129.5-132.5         |                               | CH                  |
| 3     | 2.04-2.50 b                   | 26.7-32.5           |                               | CH <sub>2</sub>     |
| 4     | 1.42 b                        | 29.2-29.9           |                               | CH <sub>2</sub>     |
| 5     | 1.42 b                        | 29.2-29.9           |                               | CH <sub>2</sub>     |
| 6     | 2.04-2.50 b                   | 26.7-32.5           |                               | CH <sub>2</sub>     |
| 7     | 6.74 b                        | 142.7-143.7         |                               | CH                  |
| 8     |                               | 131.8               |                               | q                   |
| 9     | 2.04-2.50 b                   | 26.7-32.5           |                               | CH <sub>2</sub>     |
| 10    | 2.04-2.50 b                   | 26.7-32.5           | 11                            | CH <sub>2</sub>     |
| 11    | 5.40 m                        | 129.5-131.1         | 10                            | CH                  |
| 12    | 5.40 m                        | 129.9-131.0         | 13                            | CH                  |
| 13    | 2.04-2.50 b                   | 26.7-32.5           | 12, 14, 16                    | CH <sub>2</sub>     |
| 14    | 1.42 b                        | 29.2-29.9           | 13, 15                        | CH <sub>2</sub>     |
| 15    | 1.42 b                        | 29.2-29.9           | 14, 16                        | CH <sub>2</sub>     |
| 16    | 2.04-2.50 b                   | 26.7-32.5           | 13, 15, 17                    | CH <sub>2</sub>     |
| 17    | 6.74 b                        | 142.7-143.7         | 16                            | CH                  |
| 18    |                               | 131.8               |                               | q                   |
| 19    | 2.04-2.50 b                   | 26.7-32.5           |                               | CH <sub>2</sub>     |
| 20    | 2.04-2.50 b                   | 26.7-32.5           |                               | CH <sub>2</sub>     |
| 21    | 6.24 b                        | 129.7               |                               | CH                  |
| 22    | 6.39 d (16)                   | 129.7               |                               | CH                  |
| 23    |                               | 131.9               |                               | q                   |
| 24-28 | 7.19-7.33 m                   | 128.3-129.7         |                               | CH                  |
| 29    |                               | 168.2               |                               | q                   |
| 30    | 3.70 s                        | 51.8                |                               | CH <sub>3</sub>     |

<sup>a</sup>Shaded rows correspond to the atoms in the repeating polymer unit (see Figure S1).

## References

1. Love, J. A.; Morgan, J. P.; Trnka, T. M.; Grubbs, R. H., *Angew. Chem. Int. Edit.* **2002**, *41*, 4035-4037.
2. Campbell, A.; Rydon, H. N., *J. Chem. Soc.* **1953**, 3002-3008.
3. Lee, J. C.; Parker, K. A.; Sampson, N. S., *J. Am. Chem. Soc.* **2006**, *128*, 4578-4579.
4. Griffin, R. J.; Arris, C. E.; Bleasdale, C.; Boyle, F. T.; Calvert, A. H.; Curtin, N. J.; Dalby, C.; Kanugula, S.; Lembicz, N. K.; Newell, D. R.; Pegg, A. E.; Golding, B. T., *J. Med. Chem.* **2000**, *43*, 4071-4083.
5. Mathias, L. J., *Synthesis-Stuttgart.* **1979**, 561-576.

Figure S1.  $^1\text{H-NMR}$  spectra of alternating ROMP polymers.

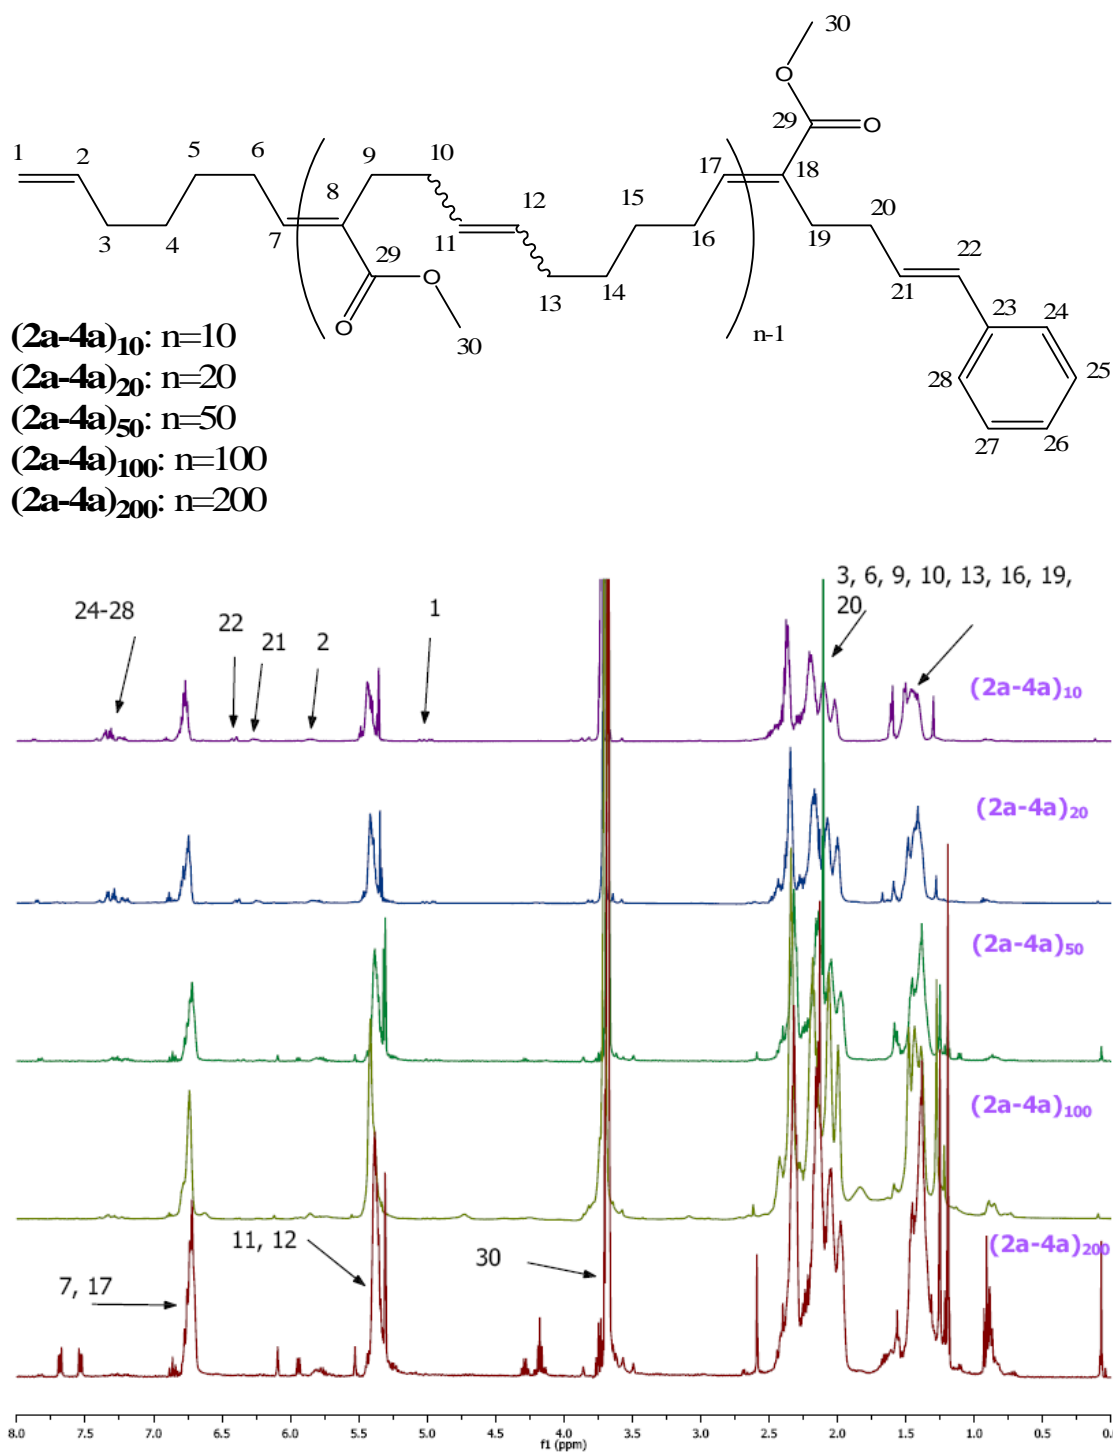



**Figure S2.**  $^{13}\text{C}$ -APT-NMR spectrum of alternating ROMP polymer **(2a-4a)<sub>20</sub>**.

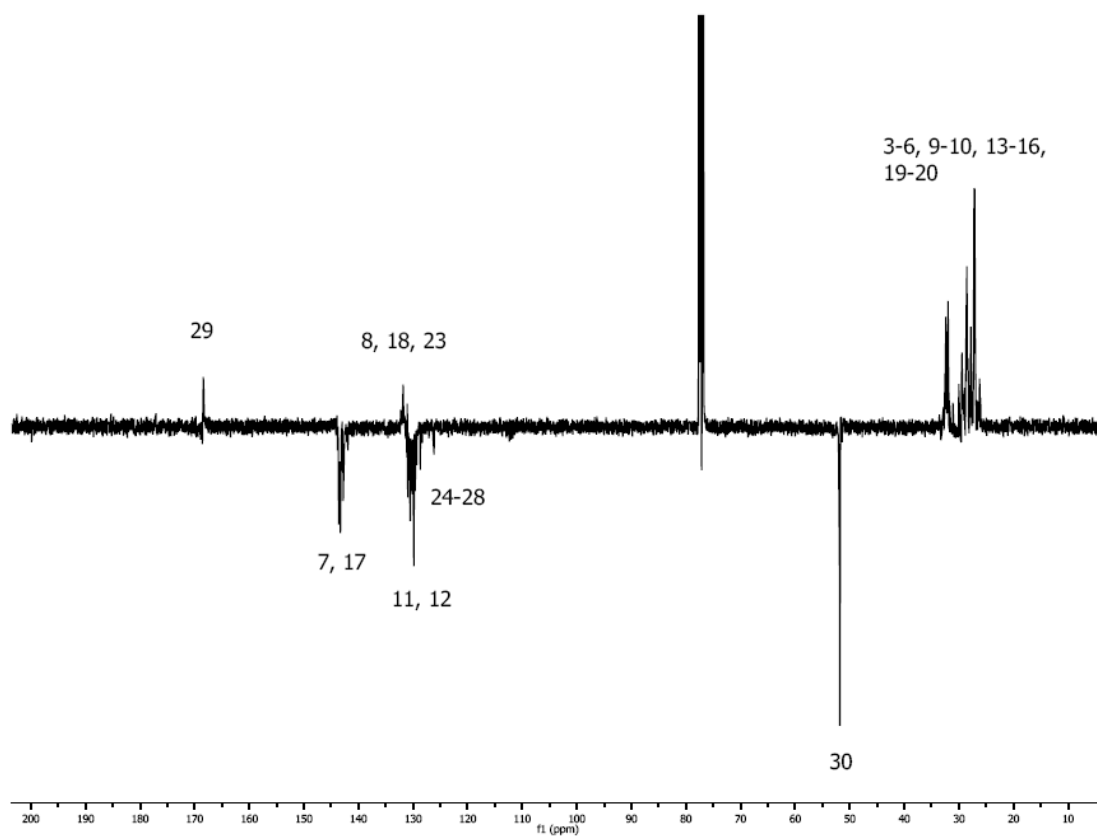

**Figure S3.**  $^1\text{H}$ - $^1\text{H}$ -gCOSY-NMR spectrum of alternating ROMP polymer (**2a-4a**)<sub>20</sub>.

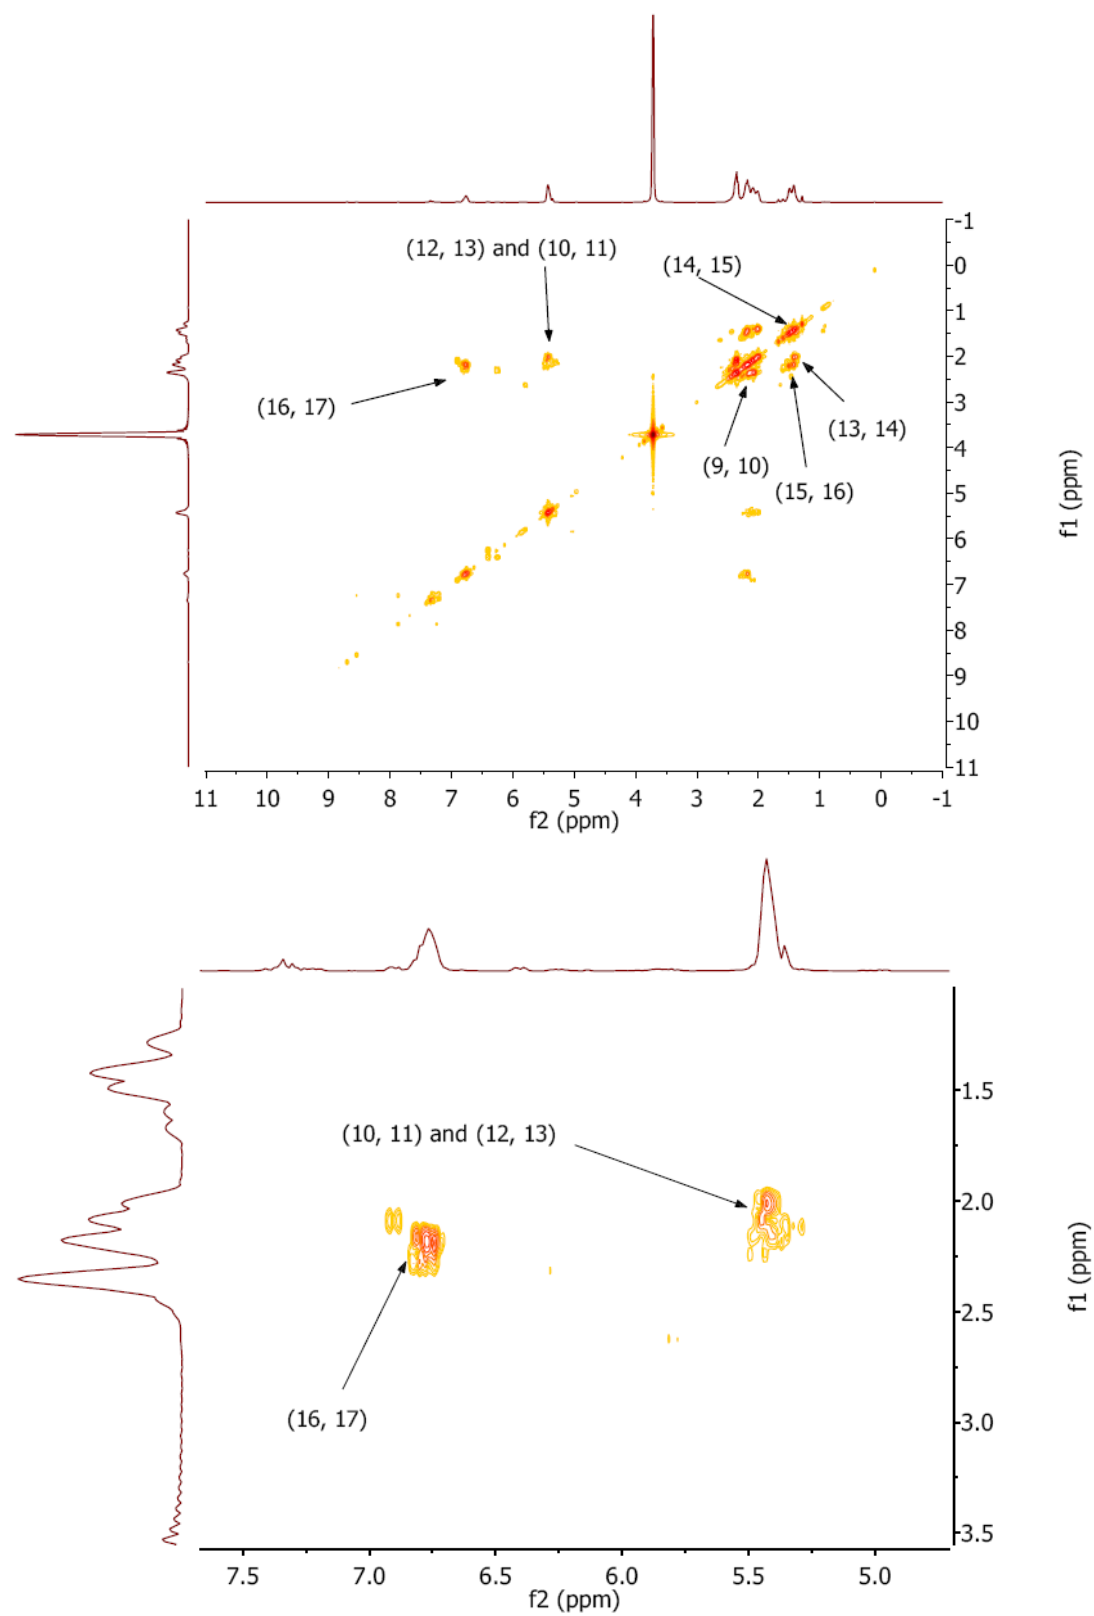

**Figure S4.** Kinetic NMR-monitoring experiment of (2a-4a)<sub>100</sub>

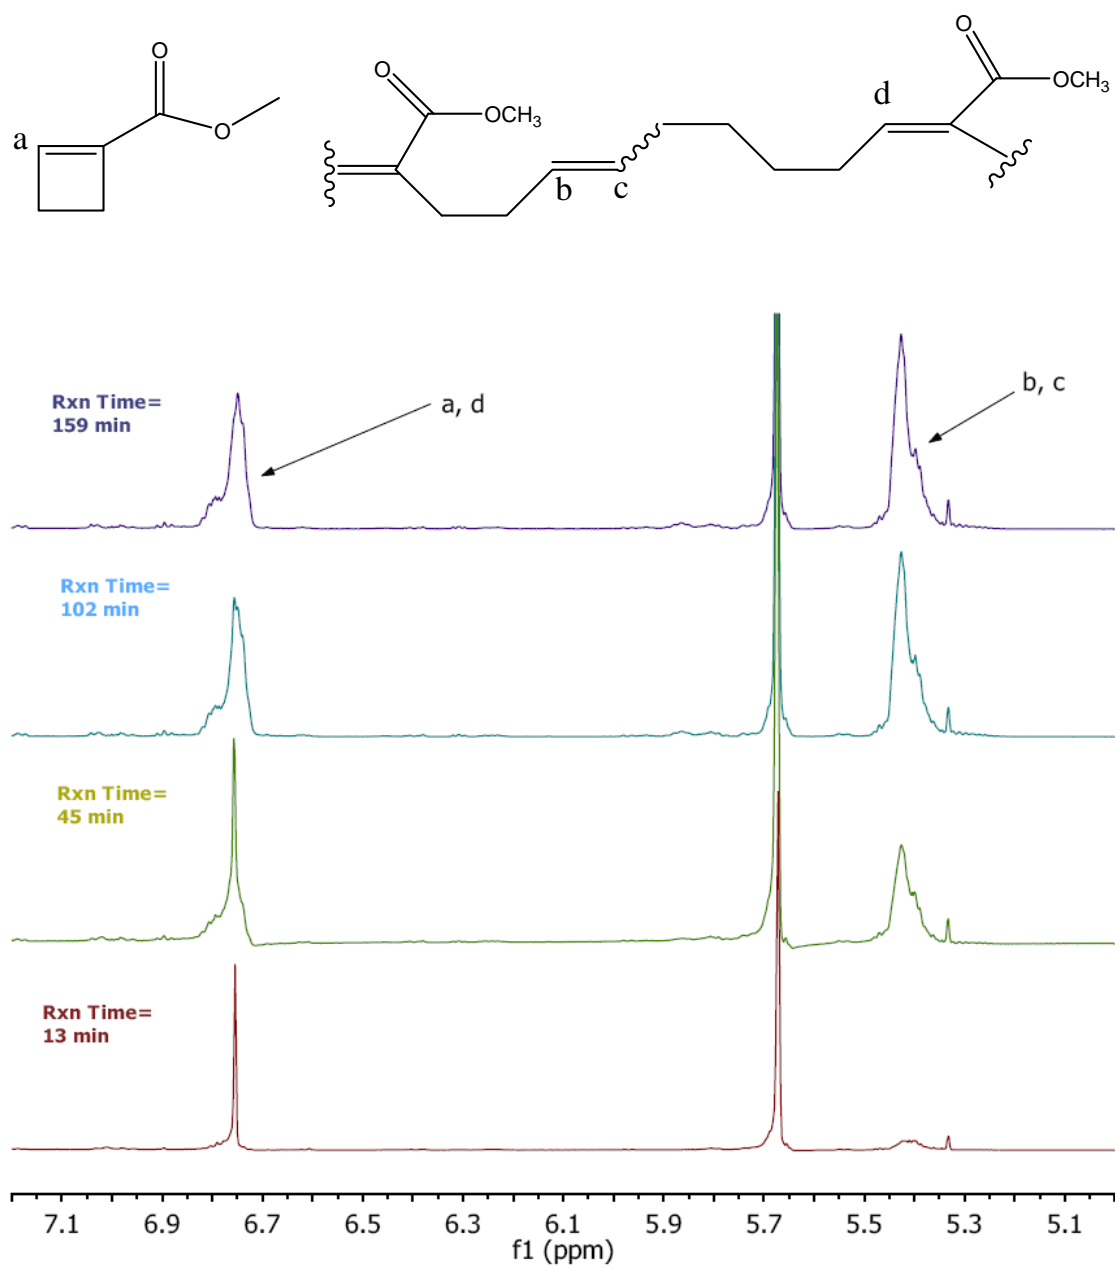

Figure S5.  $^1\text{H-NMR}$  spectrum of cyclic polymer  $\text{cyc}-(2\text{a-}4\text{a-D}_{10})_{20}$

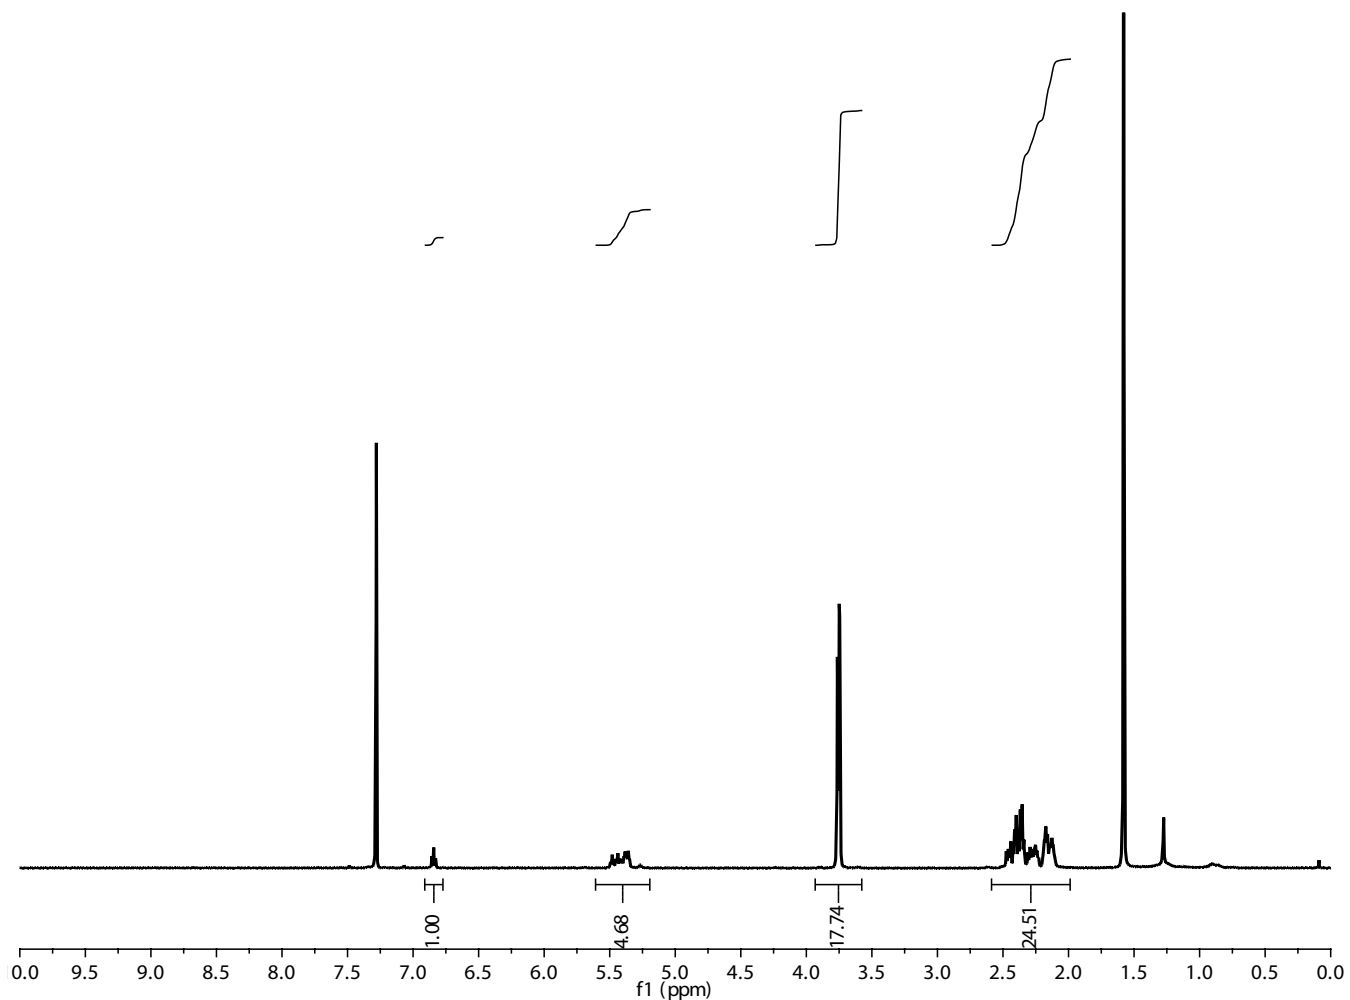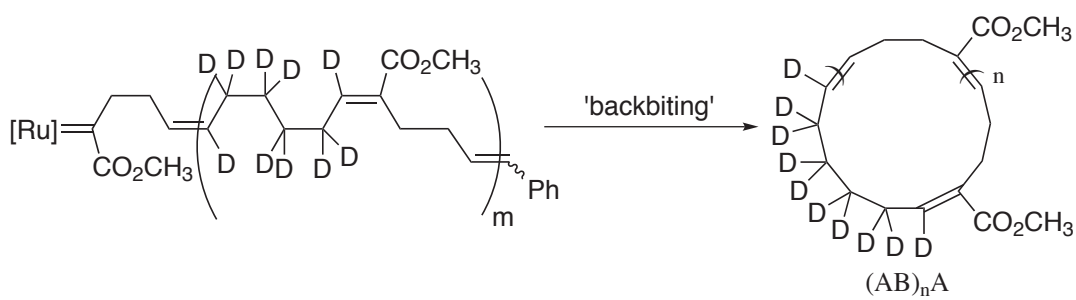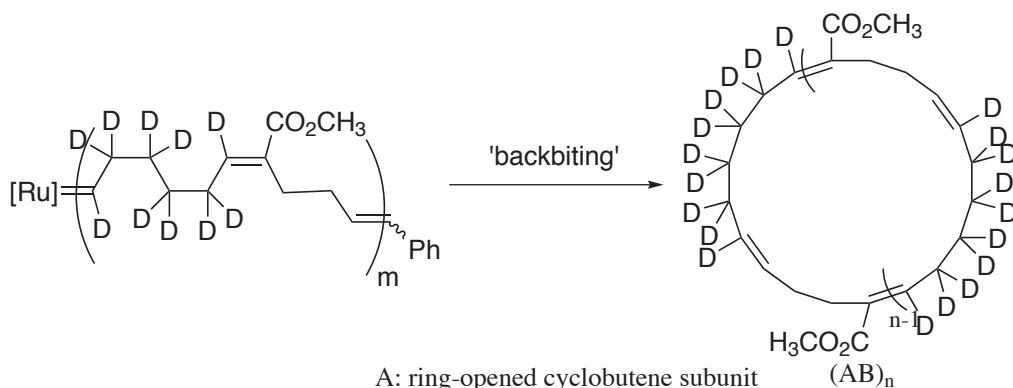

A: ring-opened cyclobutene subunit  
 B: ring-opened cyclohexene subunit

Figure S6. GPC traces of  $(2a-4a)_{100}$  and  $(2a-4a)_{200}$

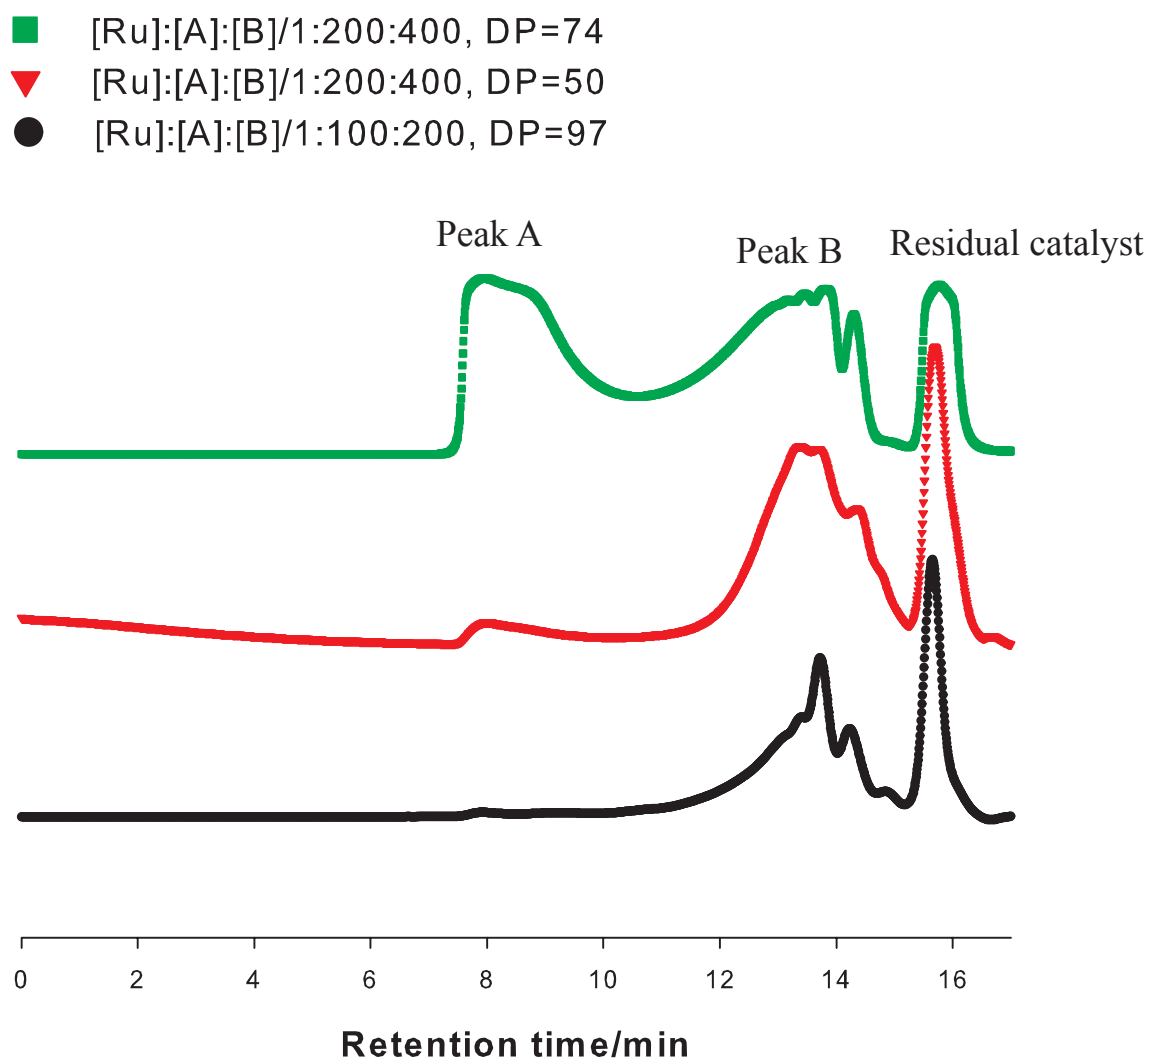

Figure S7. Bimodal peak fitting of GPC trace of  $(2a-4a)_{200}$

- + Fitted curve for the higher mass peak
- + Fitted curve for the lower mass peak
- + Original GPC curve for  $(2a-4a)_{200}$

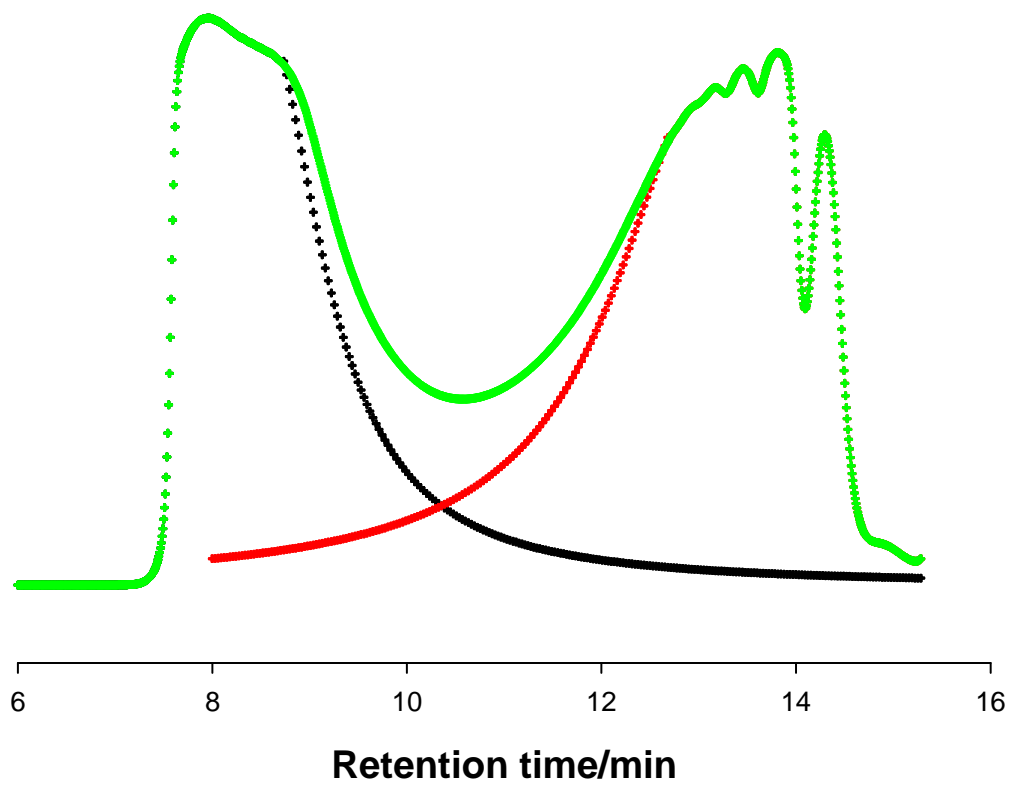

| Parameter                 | Value                                                |
|---------------------------|------------------------------------------------------|
| 1 Data File Name          | D:/ nmr01142008/ 400mhz/ CB-OCH308022007.fid/<br>fid |
| 2 Title                   | CB-OCH3                                              |
| 3 Origin                  | inova                                                |
| 4 Owner                   |                                                      |
| 5 Solvent                 | CD2Cl2                                               |
| 6 Pulse Sequence          | s2pul                                                |
| 7 Acquisition Date        | 2007-09-02T09:32:48                                  |
| 8 Modification Date       |                                                      |
| 9 Temperature             | 25.0                                                 |
| 10 Number of Scans        | 0                                                    |
| 11 Spectrometer Frequency | 399.84                                               |
| 12 Spectral Width         | 6000.6                                               |
| 13 Lowest Frequency       | -1000.8                                              |
| 14 Nucleus                | 1H                                                   |

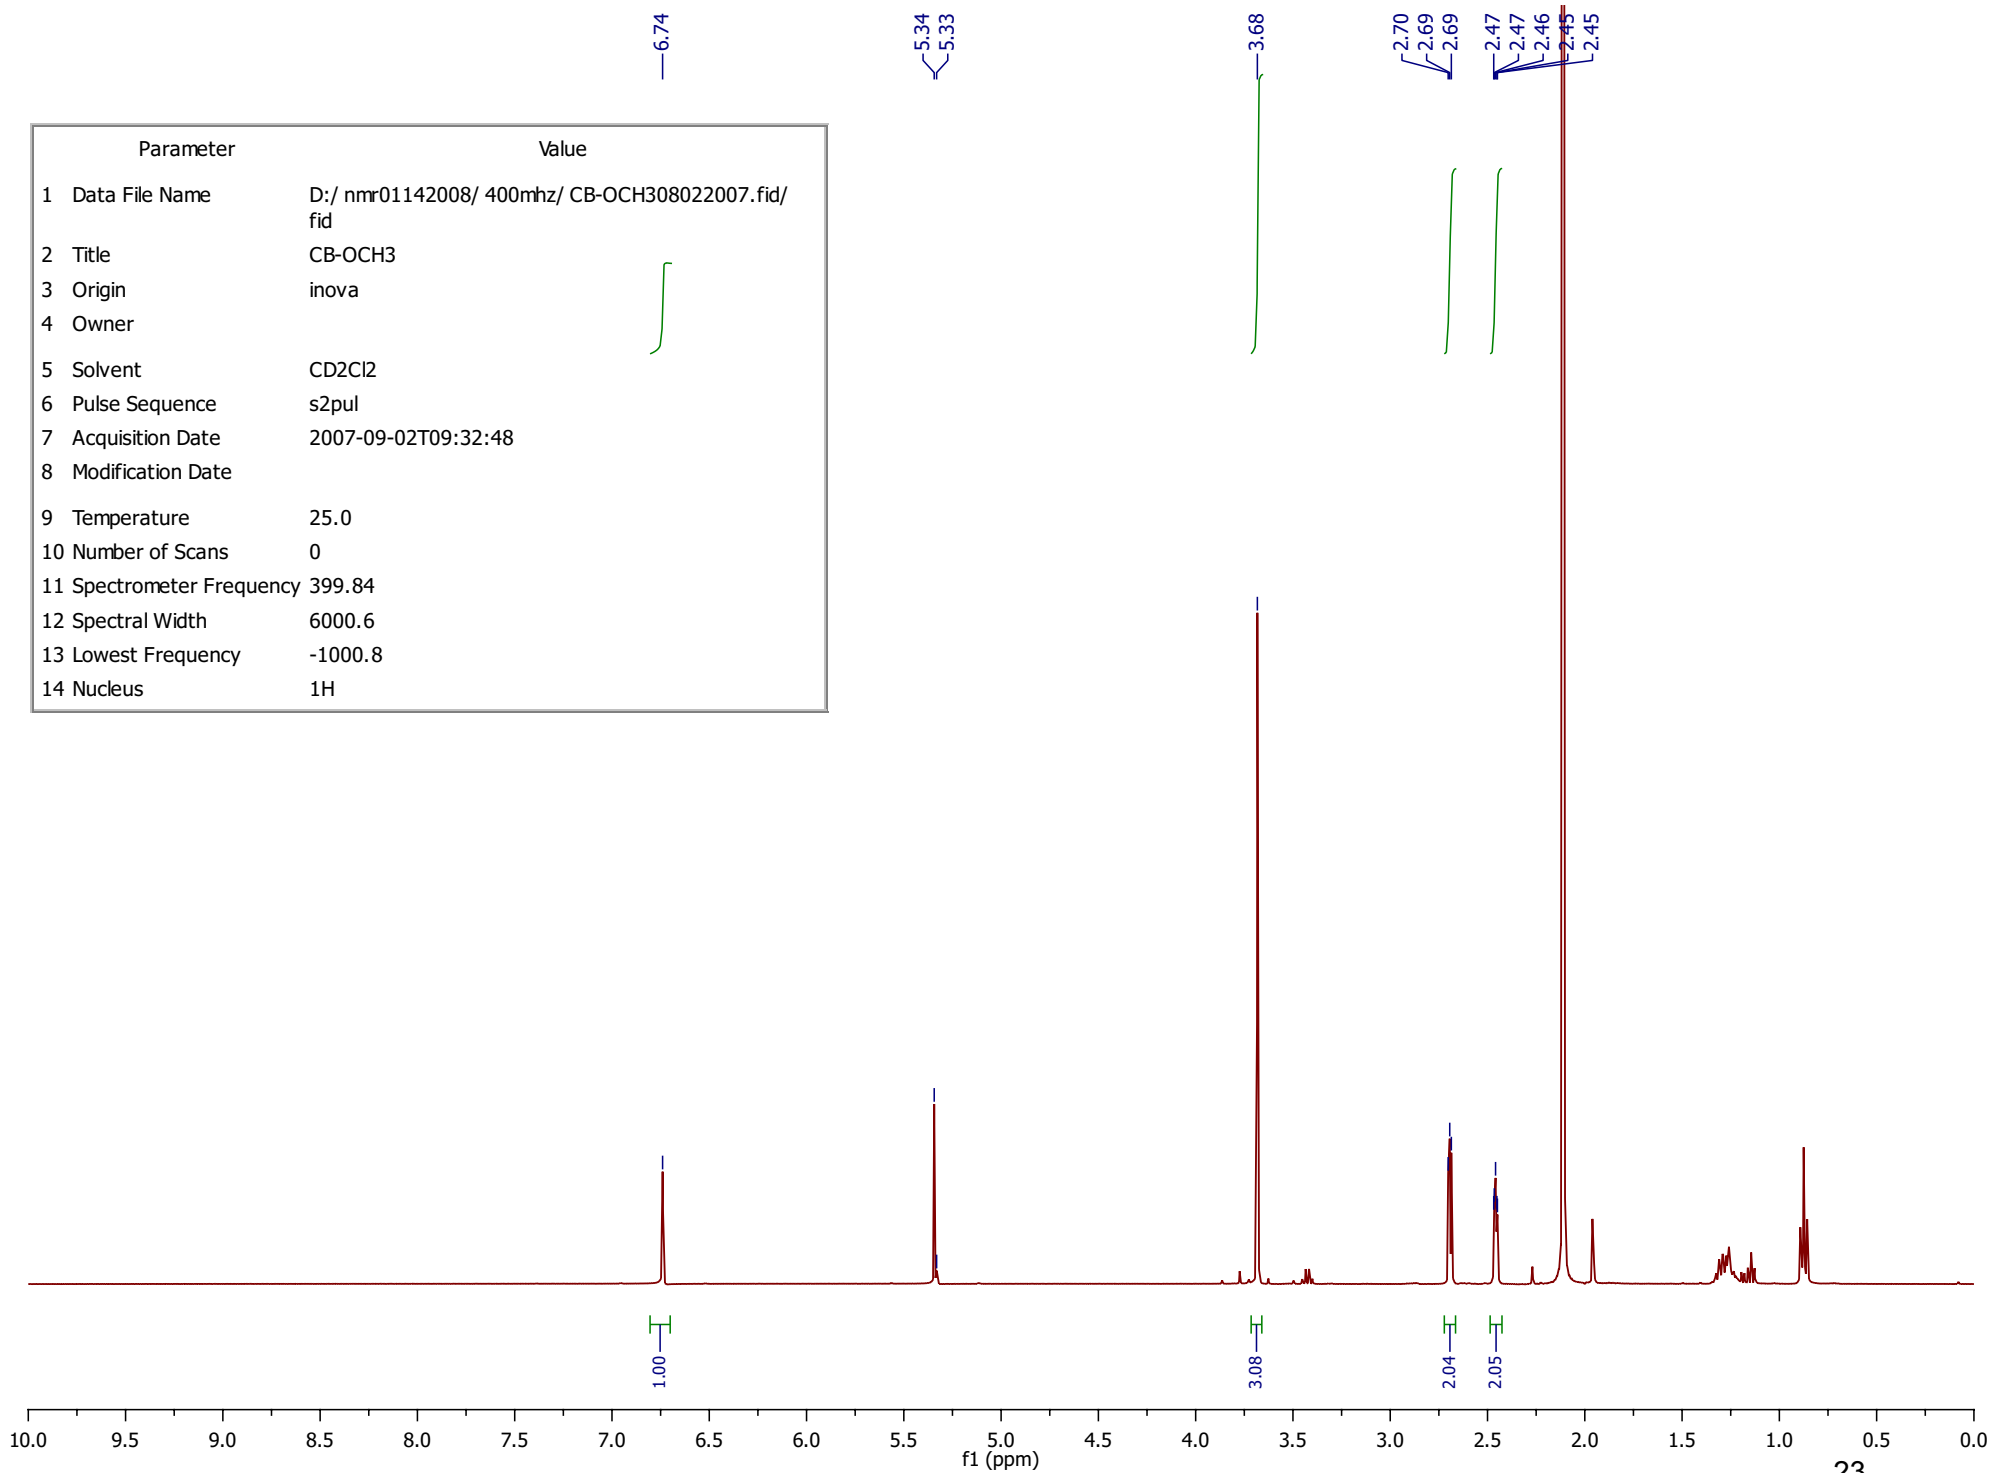

083106-CyBuCOOMe-C13

Pulse Sequence: s2pu1

Solvent: CDCl3

Temp. 25.0 C / 298.1 K

INOVA-400 "inv400"

Relax. delay 1.000 sec

Pulse 82.1 degrees

Acq. time 1.199 sec

Width 25000.0 Hz

17500 repetitions

OBSERVE C13, 100.5393067 MHz

DECOUPLE H1, 399.8399342 MHz

Power 47 dB

continuously on

WALTZ-16 modulated

DATA PROCESSING

Line broadening 1.0 Hz

FT size 65536

Total time 10 hr, 44 min, 3 sec

### 13C-NMR

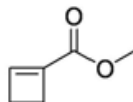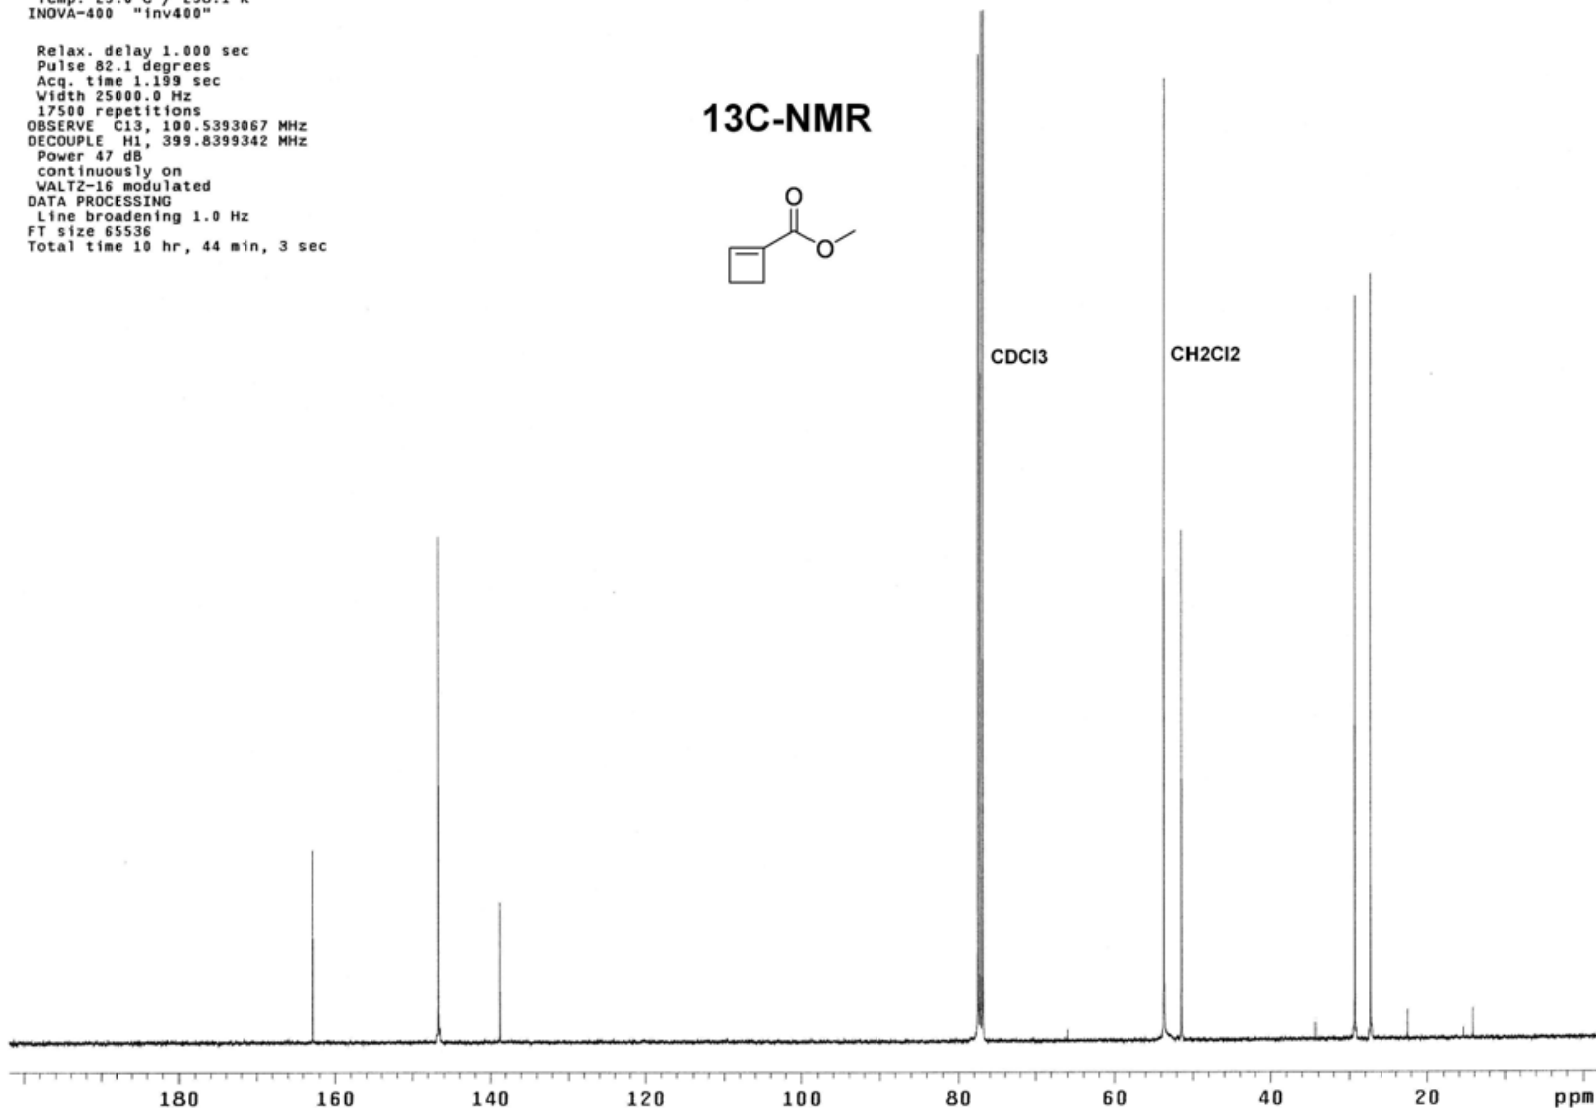



| Parameter                 | Value                                           |
|---------------------------|-------------------------------------------------|
| 1 Data File Name          | L:/ 07012008-07112008/ CBCOOPh07012008.fid/ fid |
| 2 Title                   | CBCOOPh07012008                                 |
| 3 Origin                  | inova                                           |
| 4 Owner                   |                                                 |
| 5 Solvent                 | CDCl3                                           |
| 6 Pulse Sequence          | s2pul                                           |
| 7 Acquisition Date        | 2008-08-01T10:50:27                             |
| 8 Modification Date       |                                                 |
| 9 Temperature             | 25.0                                            |
| 10 Number of Scans        | 40                                              |
| 11 Spectrometer Frequency | 499.90                                          |
| 12 Spectral Width         | 8003.2                                          |
| 13 Lowest Frequency       | -1977.6                                         |
| 14 Nucleus                | 1H                                              |
| 15 Acquired Size          | 15136                                           |
| 16 Spectral Size          | 32768                                           |

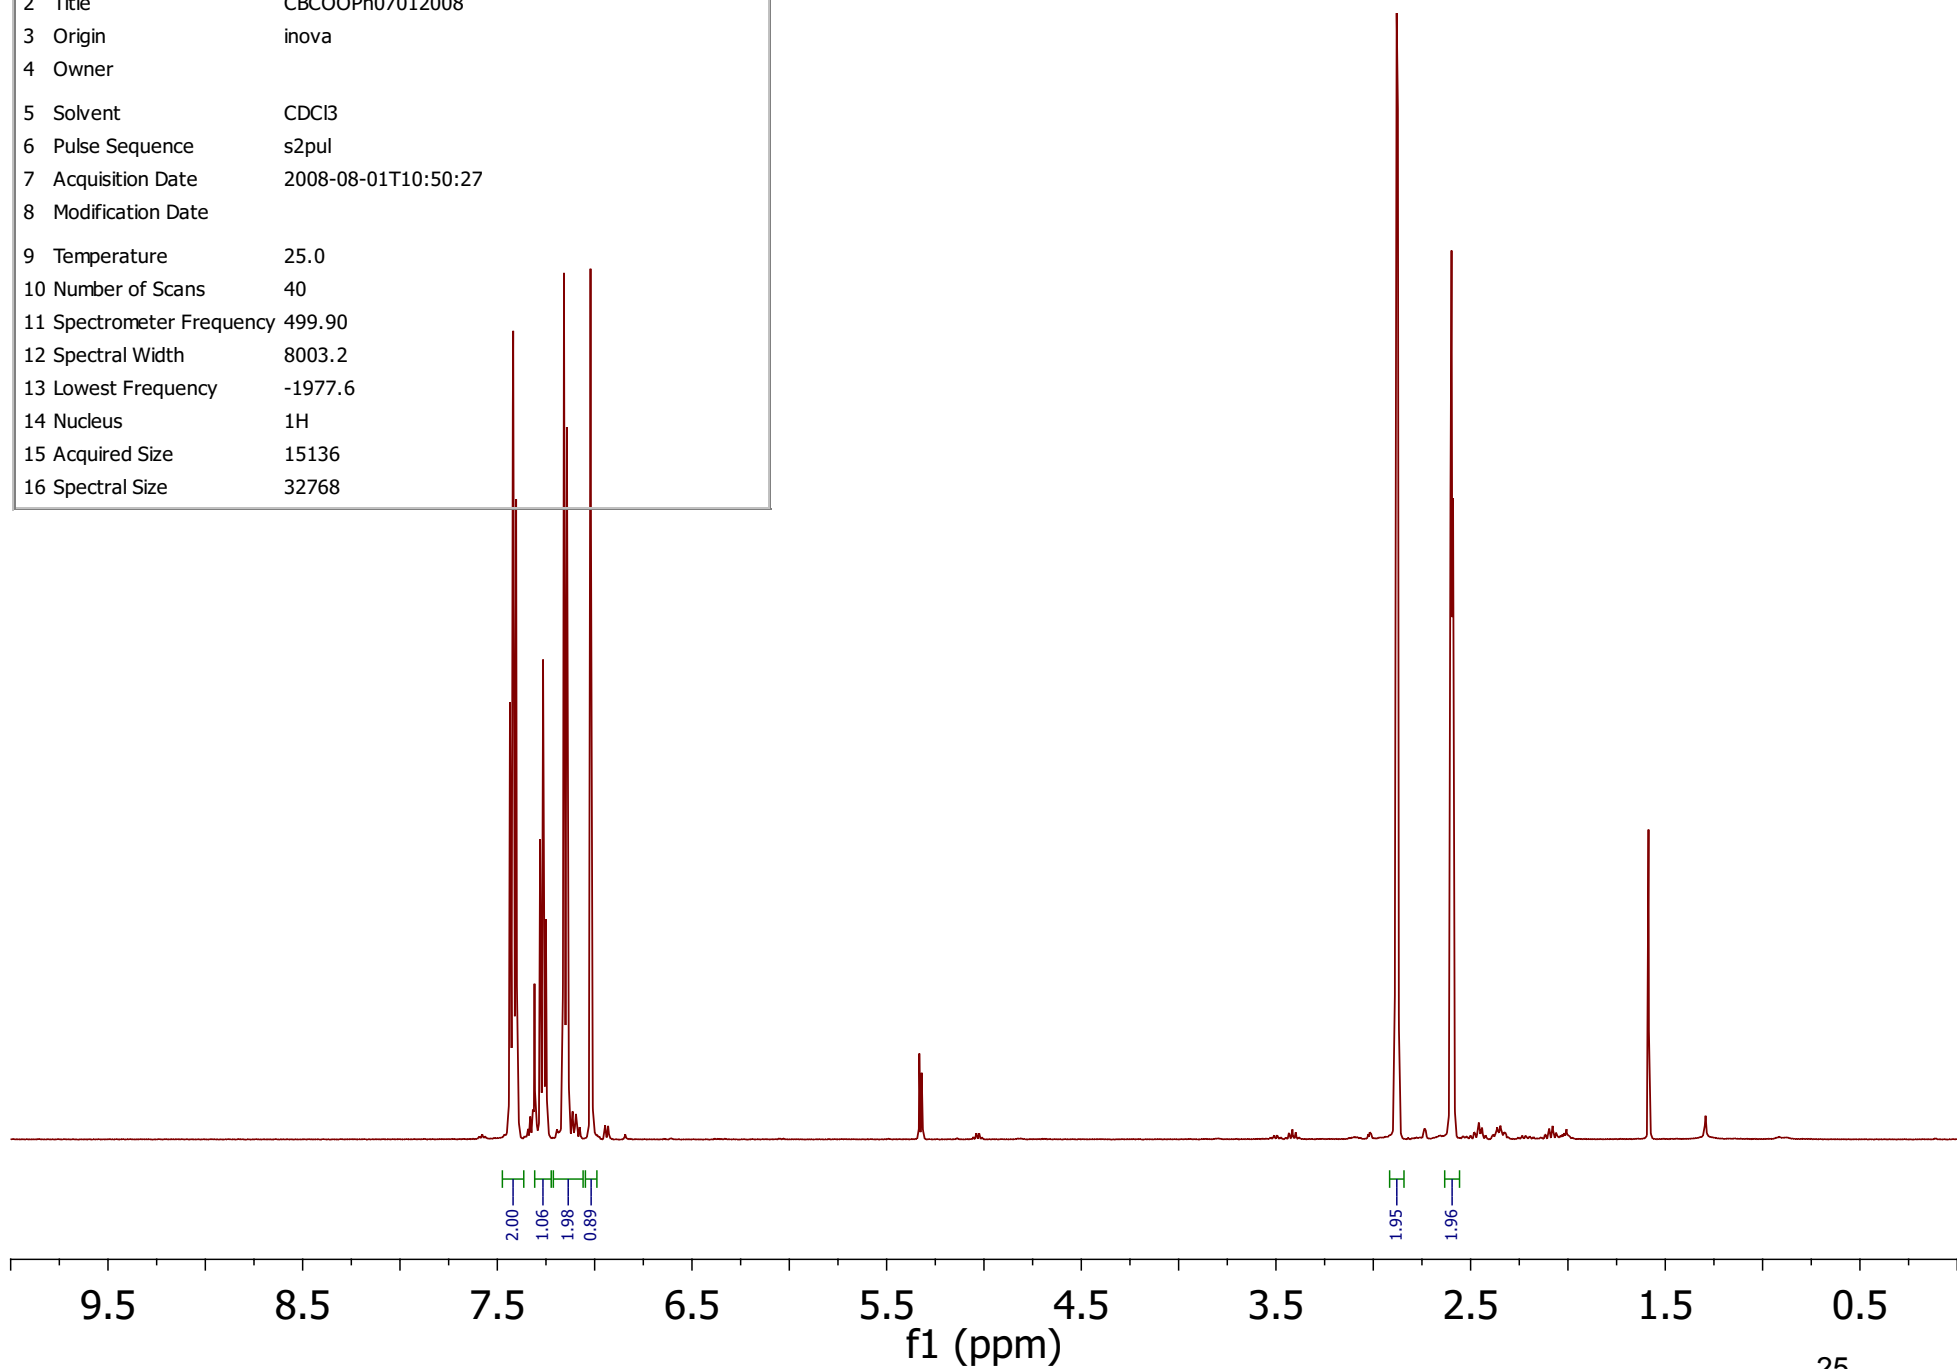

| Parameter                 | Value                                              |
|---------------------------|----------------------------------------------------|
| 1 Data File Name          | L:/07012008-07112008/CBCOOPh-C13-07012008.fid/ fid |
| 2 Title                   | CBCOOPh-C13-07012008                               |
| 3 Origin                  | inova                                              |
| 4 Owner                   |                                                    |
| 5 Solvent                 | CD2Cl2                                             |
| 6 Pulse Sequence          | s2pul                                              |
| 7 Acquisition Date        | 2008-08-01T11:14:09                                |
| 8 Modification Date       |                                                    |
| 9 Temperature             | 25.0                                               |
| 10 Number of Scans        | 1048                                               |
| 11 Spectrometer Frequency | 100.55                                             |
| 12 Spectral Width         | 25000.0                                            |
| 13 Lowest Frequency       | -2986.2                                            |
| 14 Nucleus                | 13C                                                |
| 15 Acquired Size          | 29984                                              |
| 16 Spectral Size          | 65536                                              |

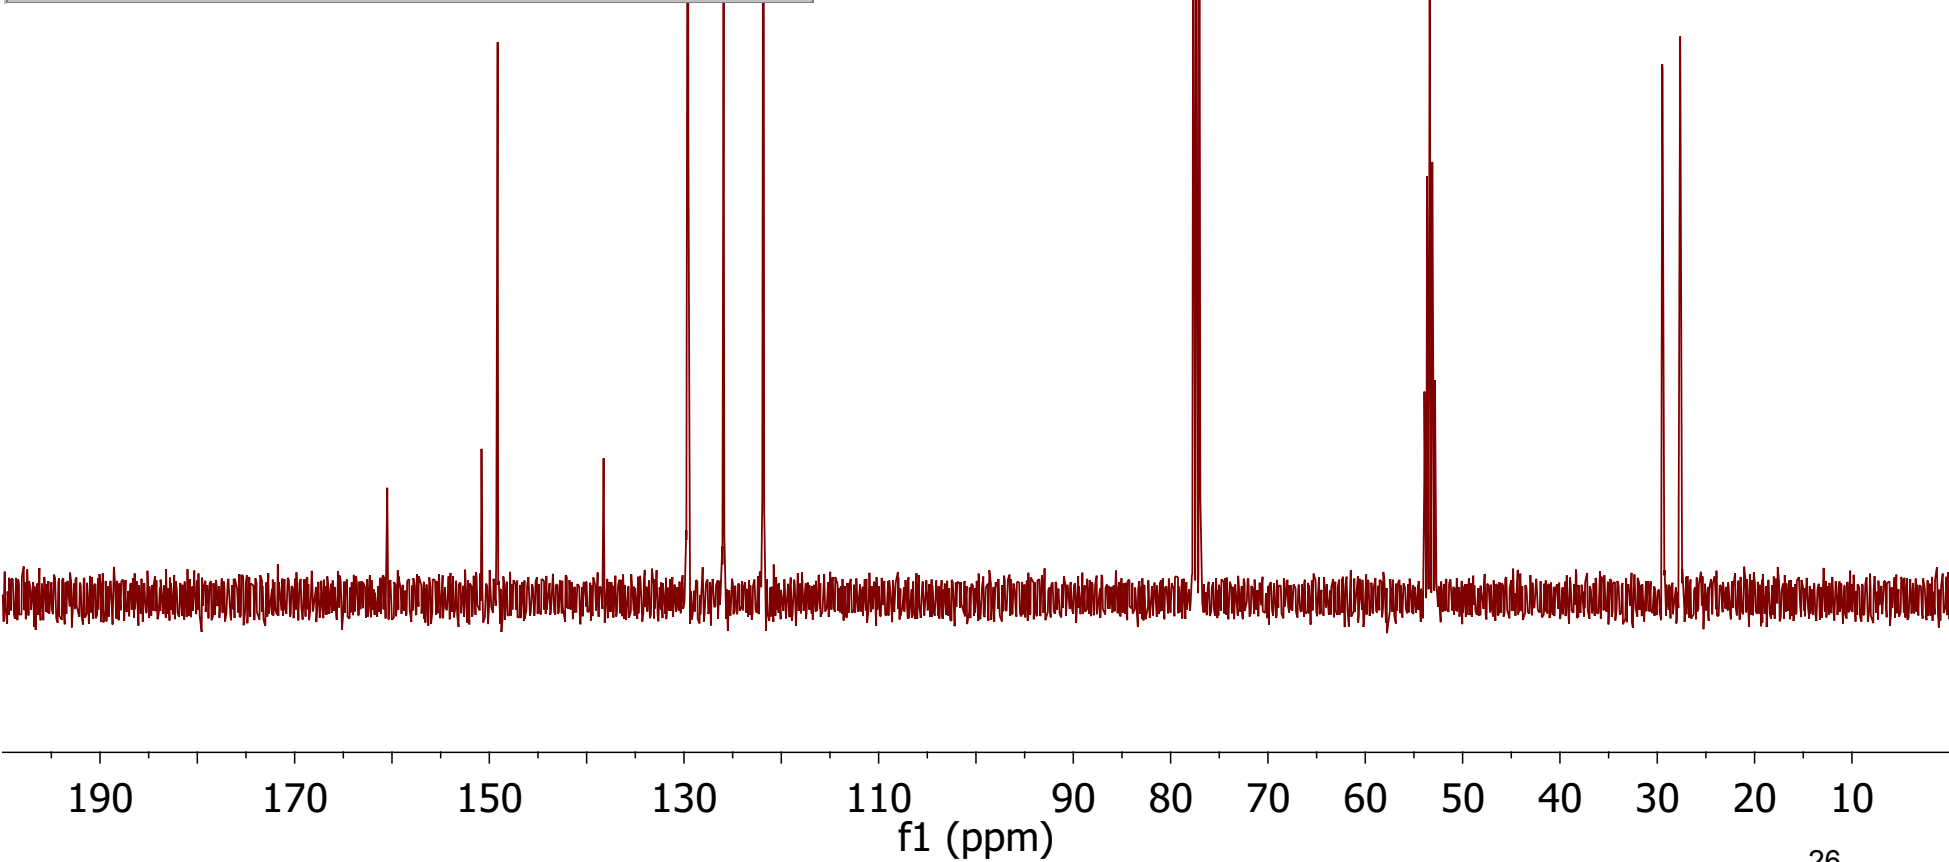

| Parameter                 | Value                                                                |
|---------------------------|----------------------------------------------------------------------|
| 1 Data File Name          | L:/ nmr04162008-07012008/ cyclohexene-4-methylether06172008.fid/ fid |
| 2 Title                   | cyclohexene-4-methylether                                            |
| 3 Origin                  | inova                                                                |
| 4 Owner                   |                                                                      |
| 5 Solvent                 | CDCl3                                                                |
| 6 Pulse Sequence          | s2pul                                                                |
| 7 Acquisition Date        | 2008-07-17T09:31:41                                                  |
| 8 Modification Date       |                                                                      |
| 9 Temperature             | 25.0                                                                 |
| 10 Number of Scans        | 32                                                                   |
| 11 Spectrometer Frequency | 499.90                                                               |
| 12 Spectral Width         | 8003.2                                                               |
| 13 Lowest Frequency       | -1002.3                                                              |
| 14 Nucleus                | 1H                                                                   |
| 15 Acquired Size          | 15136                                                                |
| 16 Spectral Size          | 32768                                                                |

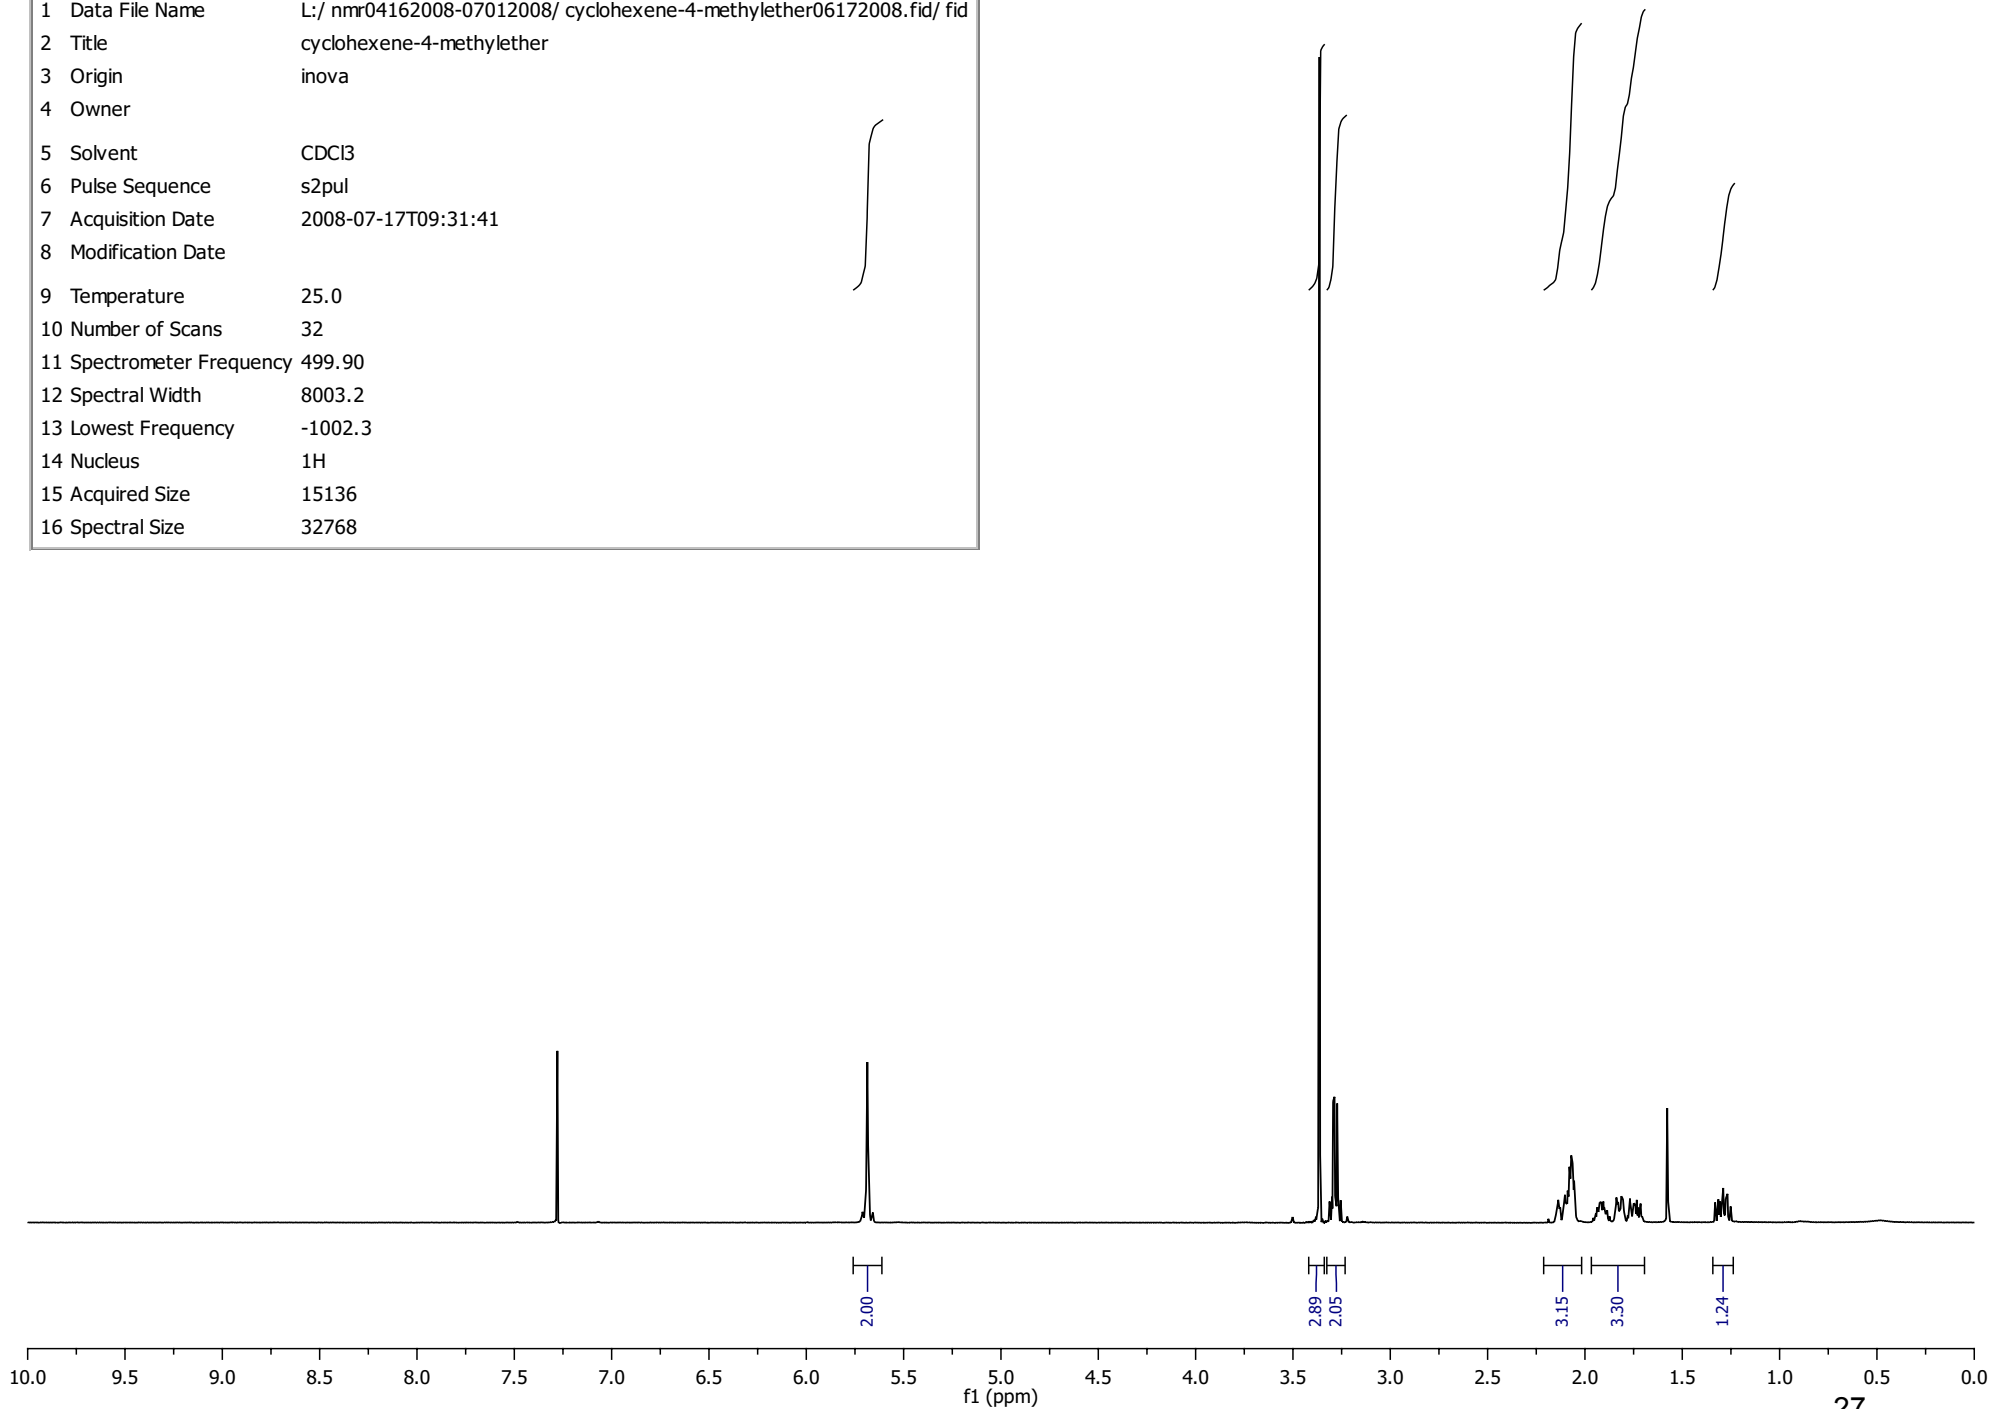

| Parameter                 | Value                                                          |
|---------------------------|----------------------------------------------------------------|
| 1 Data File Name          | L:/ 07012008-07112008/ 4-Methoxymethylcyclohexene-C13.fid/ fid |
| 2 Title                   | 4-methoxymethylcyclohexene-C13                                 |
| 3 Origin                  | inova                                                          |
| 4 Owner                   |                                                                |
| 5 Solvent                 | CDCl3                                                          |
| 6 Pulse Sequence          | s2pul                                                          |
| 7 Acquisition Date        | 2008-08-10T06:23:53                                            |
| 8 Modification Date       |                                                                |
| 9 Temperature             | 25.0                                                           |
| 10 Number of Scans        | 160                                                            |
| 11 Spectrometer Frequency | 100.55                                                         |
| 12 Spectral Width         | 25000.0                                                        |
| 13 Lowest Frequency       | -2986.3                                                        |
| 14 Nucleus                | 13C                                                            |
| 15 Acquired Size          | 29984                                                          |
| 16 Spectral Size          | 65536                                                          |

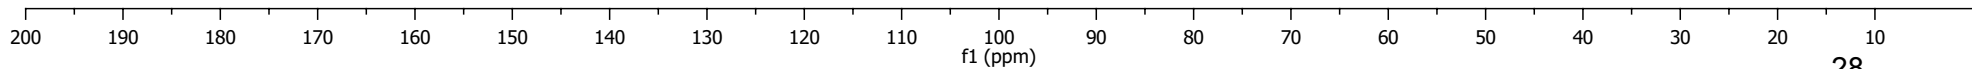

CBCOOCH3-cyclohexene-3mer

Data Collected on:  
inv500-inova500  
Archive directory:  
/export/home/sar/vnmrsys/data  
Sample directory:

File: CBCOOCH3-cyclohexene-3mer02192008

Pulse Sequence: s2pul  
Solvent: CD2Cl2  
Temp. 25.0 C / 298.1 K

Relax. delay 1.000 sec  
Pulse 45.0 degrees  
Acq. time 1.891 sec  
Width 8003.2 Hz  
32 repetitions  
OBSERVE H1, 499.8957677 MHz  
DATA PROCESSING  
FT size 32768  
Total time 4 min

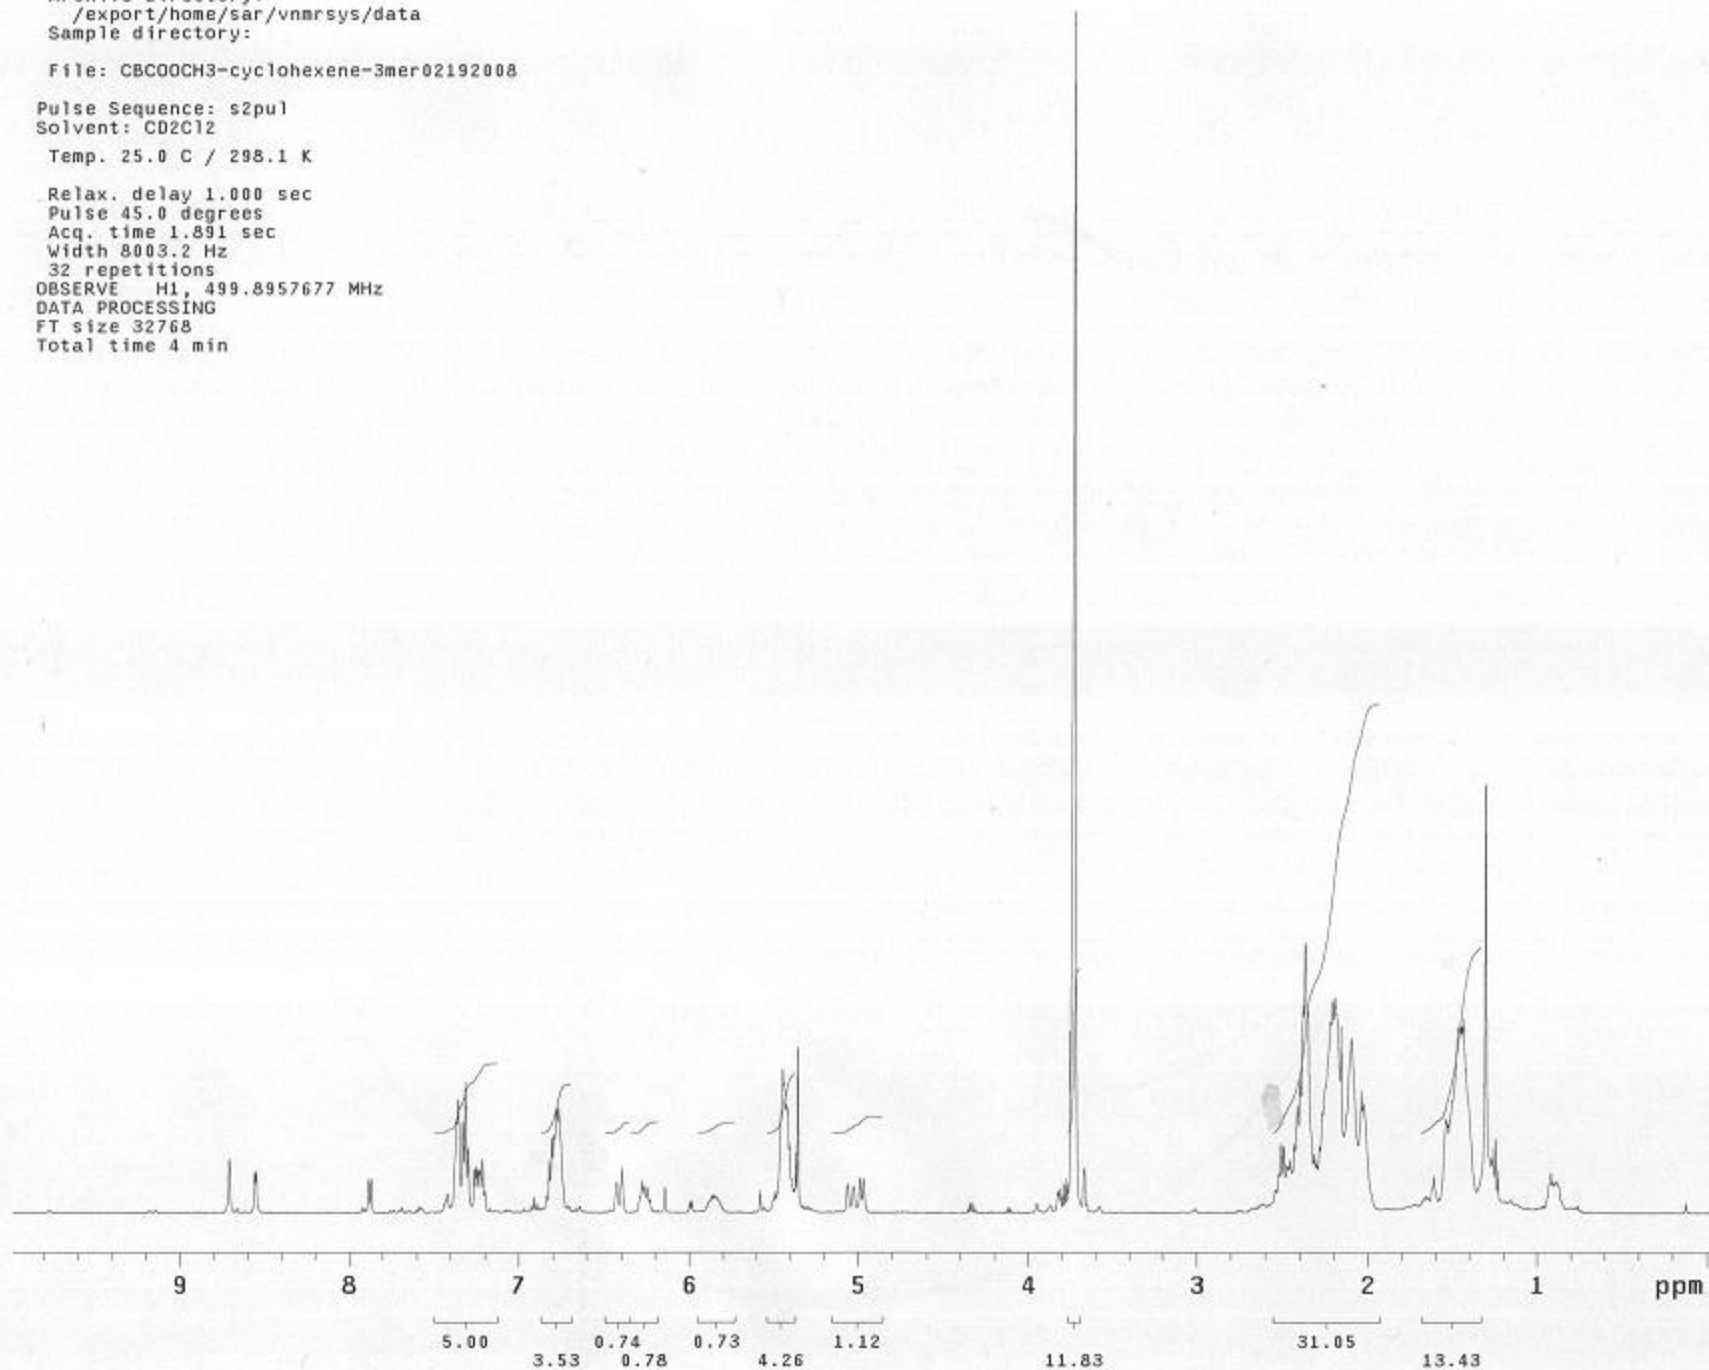

CBCOCH3-cyclohexene-3mer-C13

Data Collected on:  
inv500-inova500  
Archive directory:  
/export/home/sar/vnmrsys/data  
Sample directory:

File: CARBON

Pulse Sequence: s2pul  
Solvent: CD2Cl2  
Temp. 25.0 C / 298.1 K  
User: 1-14-87

Relax. delay 1.000 sec  
Pulse 45.0 degrees  
Acq. time 1.300 sec  
Width 31446.5 Hz  
24256 repetitions  
OBSERVE C13, 125.6985558 MHz  
DECOUPLE H1, 499.8982673 MHz  
Power 45 dB  
continuously on  
WALTZ-16 modulated  
DATA PROCESSING  
FT size 131072  
Total time 32 hr, 4 min

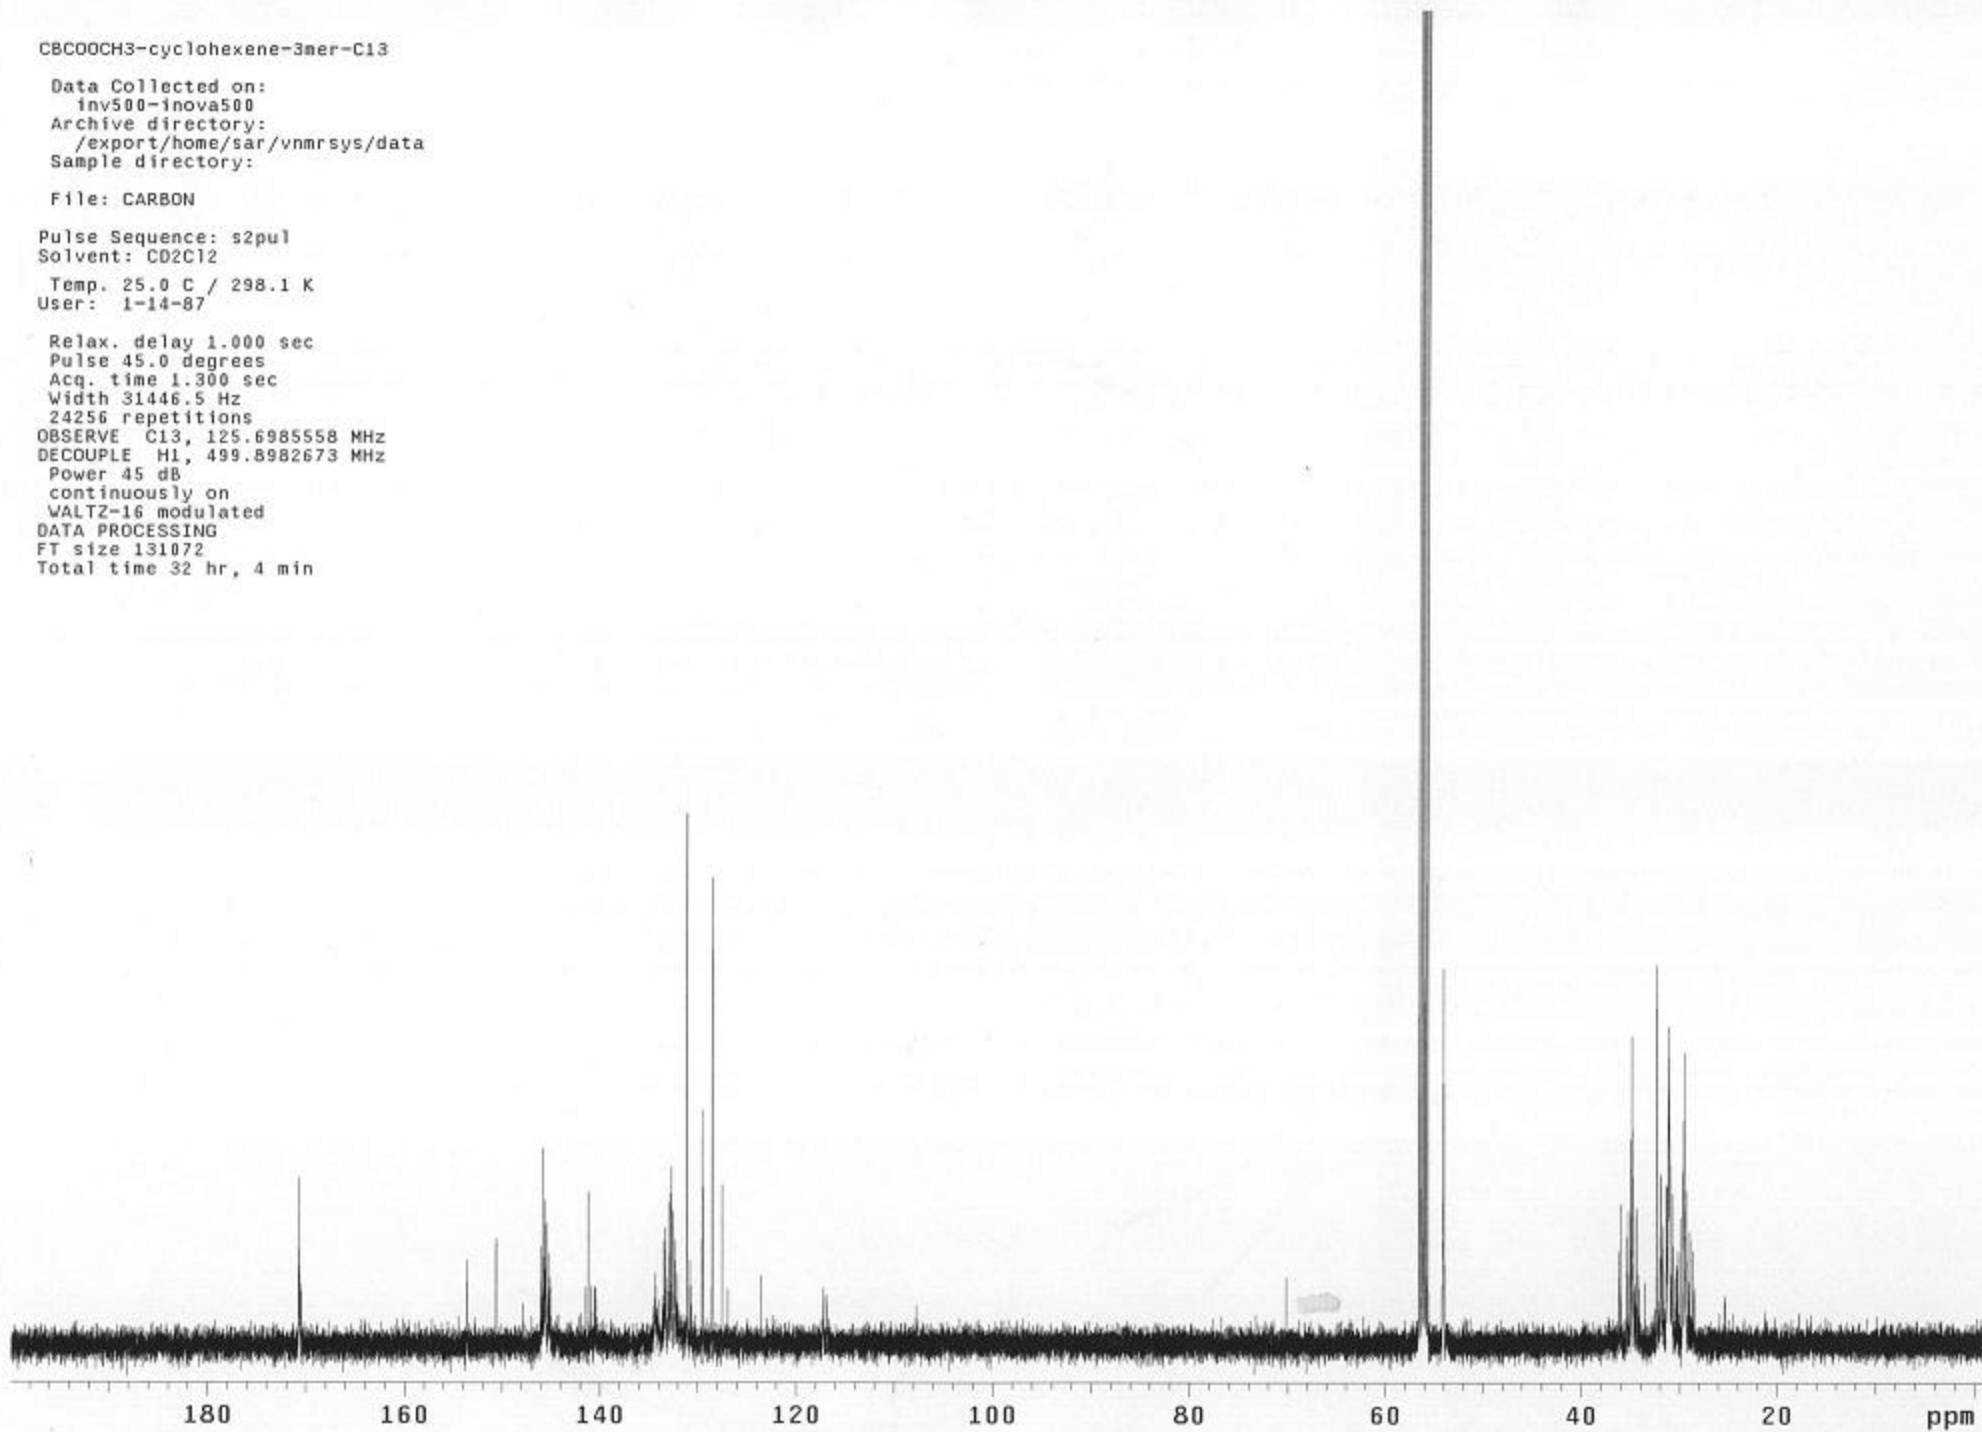

| Parameter                 | Value                                                               |
|---------------------------|---------------------------------------------------------------------|
| 1 Data File Name          | L:/ data03252008/ 500mhz/ 20mer-alternate01172008_a/ 10mer.fid/ fid |
| 2 Title                   | 10mer in CD2Cl21D DPGSE NOESY01/ 17/ 2008                           |
| 3 Origin                  | inova                                                               |
| 4 Owner                   |                                                                     |
| 5 Solvent                 | CD2Cl2                                                              |
| 6 Pulse Sequence          | s2pul                                                               |
| 7 Acquisition Date        | 2008-02-17T10:46:44                                                 |
| 8 Modification Date       |                                                                     |
| 9 Temperature             | 25.0                                                                |
| 10 Number of Scans        | 16                                                                  |
| 11 Spectrometer Frequency | 499.90                                                              |
| 12 Spectral Width         | 5497.5                                                              |
| 13 Lowest Frequency       | -499.2                                                              |
| 14 Nucleus                | 1H                                                                  |
| 15 Acquired Size          | 16384                                                               |
| 16 Spectral Size          | 32768                                                               |

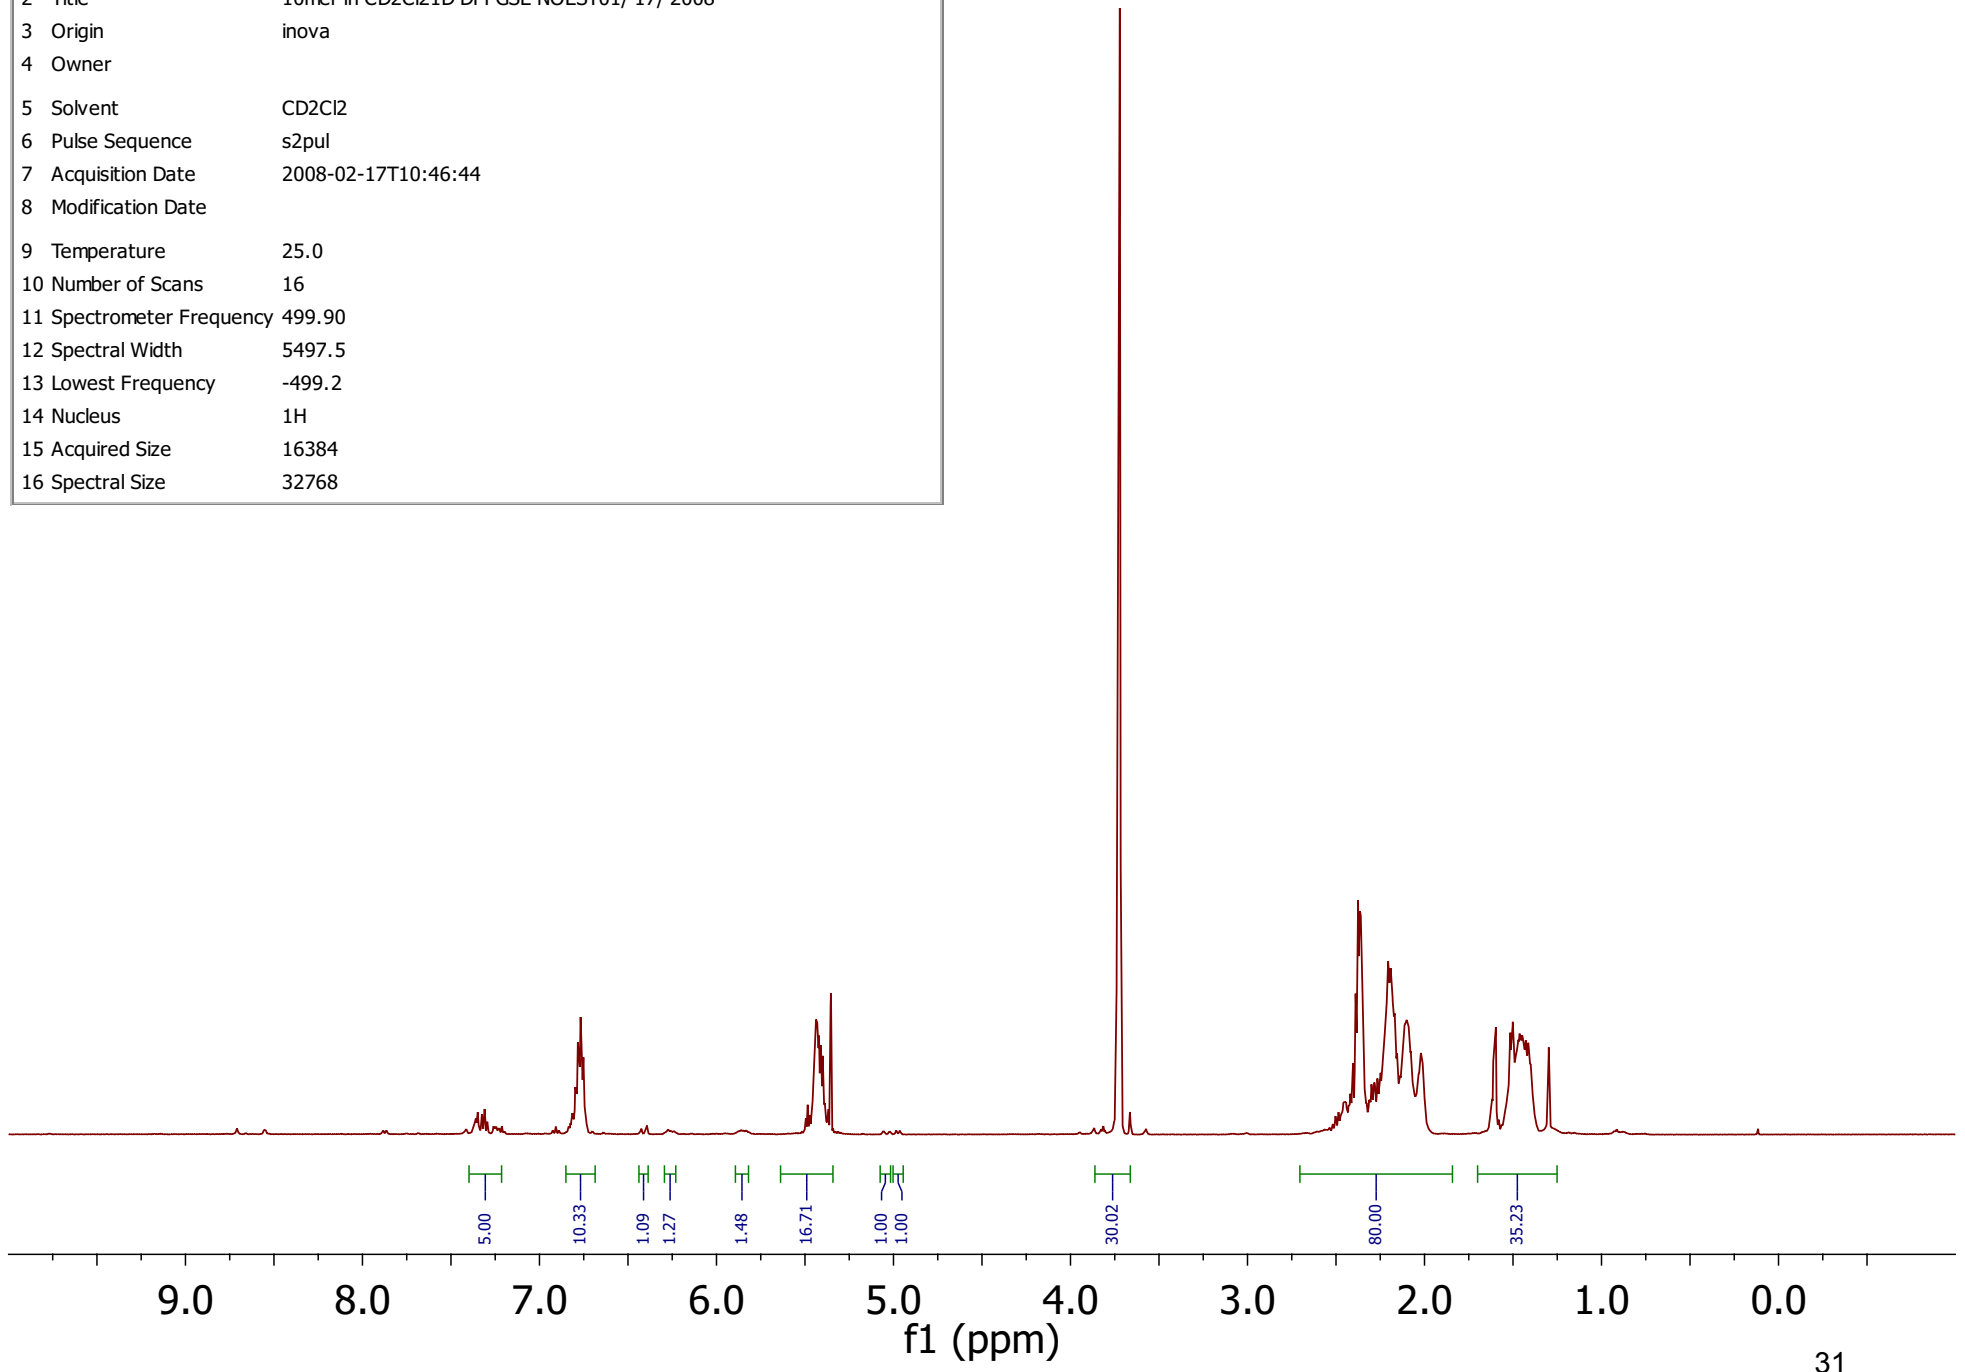

| Parameter                 | Value                                                                          |
|---------------------------|--------------------------------------------------------------------------------|
| 1 Data File Name          | D:/ data03252008/ 601/ 20mer-alternate01112008noesy_11Jan2008/ PROTON.fid/ fid |
| 2 Title                   |                                                                                |
| 3 Origin                  | inova                                                                          |
| 4 Owner                   |                                                                                |
| 5 Solvent                 | CD2Cl2                                                                         |
| 6 Pulse Sequence          | s2pul                                                                          |
| 7 Acquisition Date        | 2008-02-11T05:49:08                                                            |
| 8 Modification Date       |                                                                                |
| 9 Temperature             | 25.0                                                                           |
| 10 Number of Scans        | 32                                                                             |
| 11 Spectrometer Frequency | 599.72                                                                         |
| 12 Spectral Width         | 7196.8                                                                         |
| 13 Lowest Frequency       | -599.9                                                                         |
| 14 Nucleus                | 1H                                                                             |

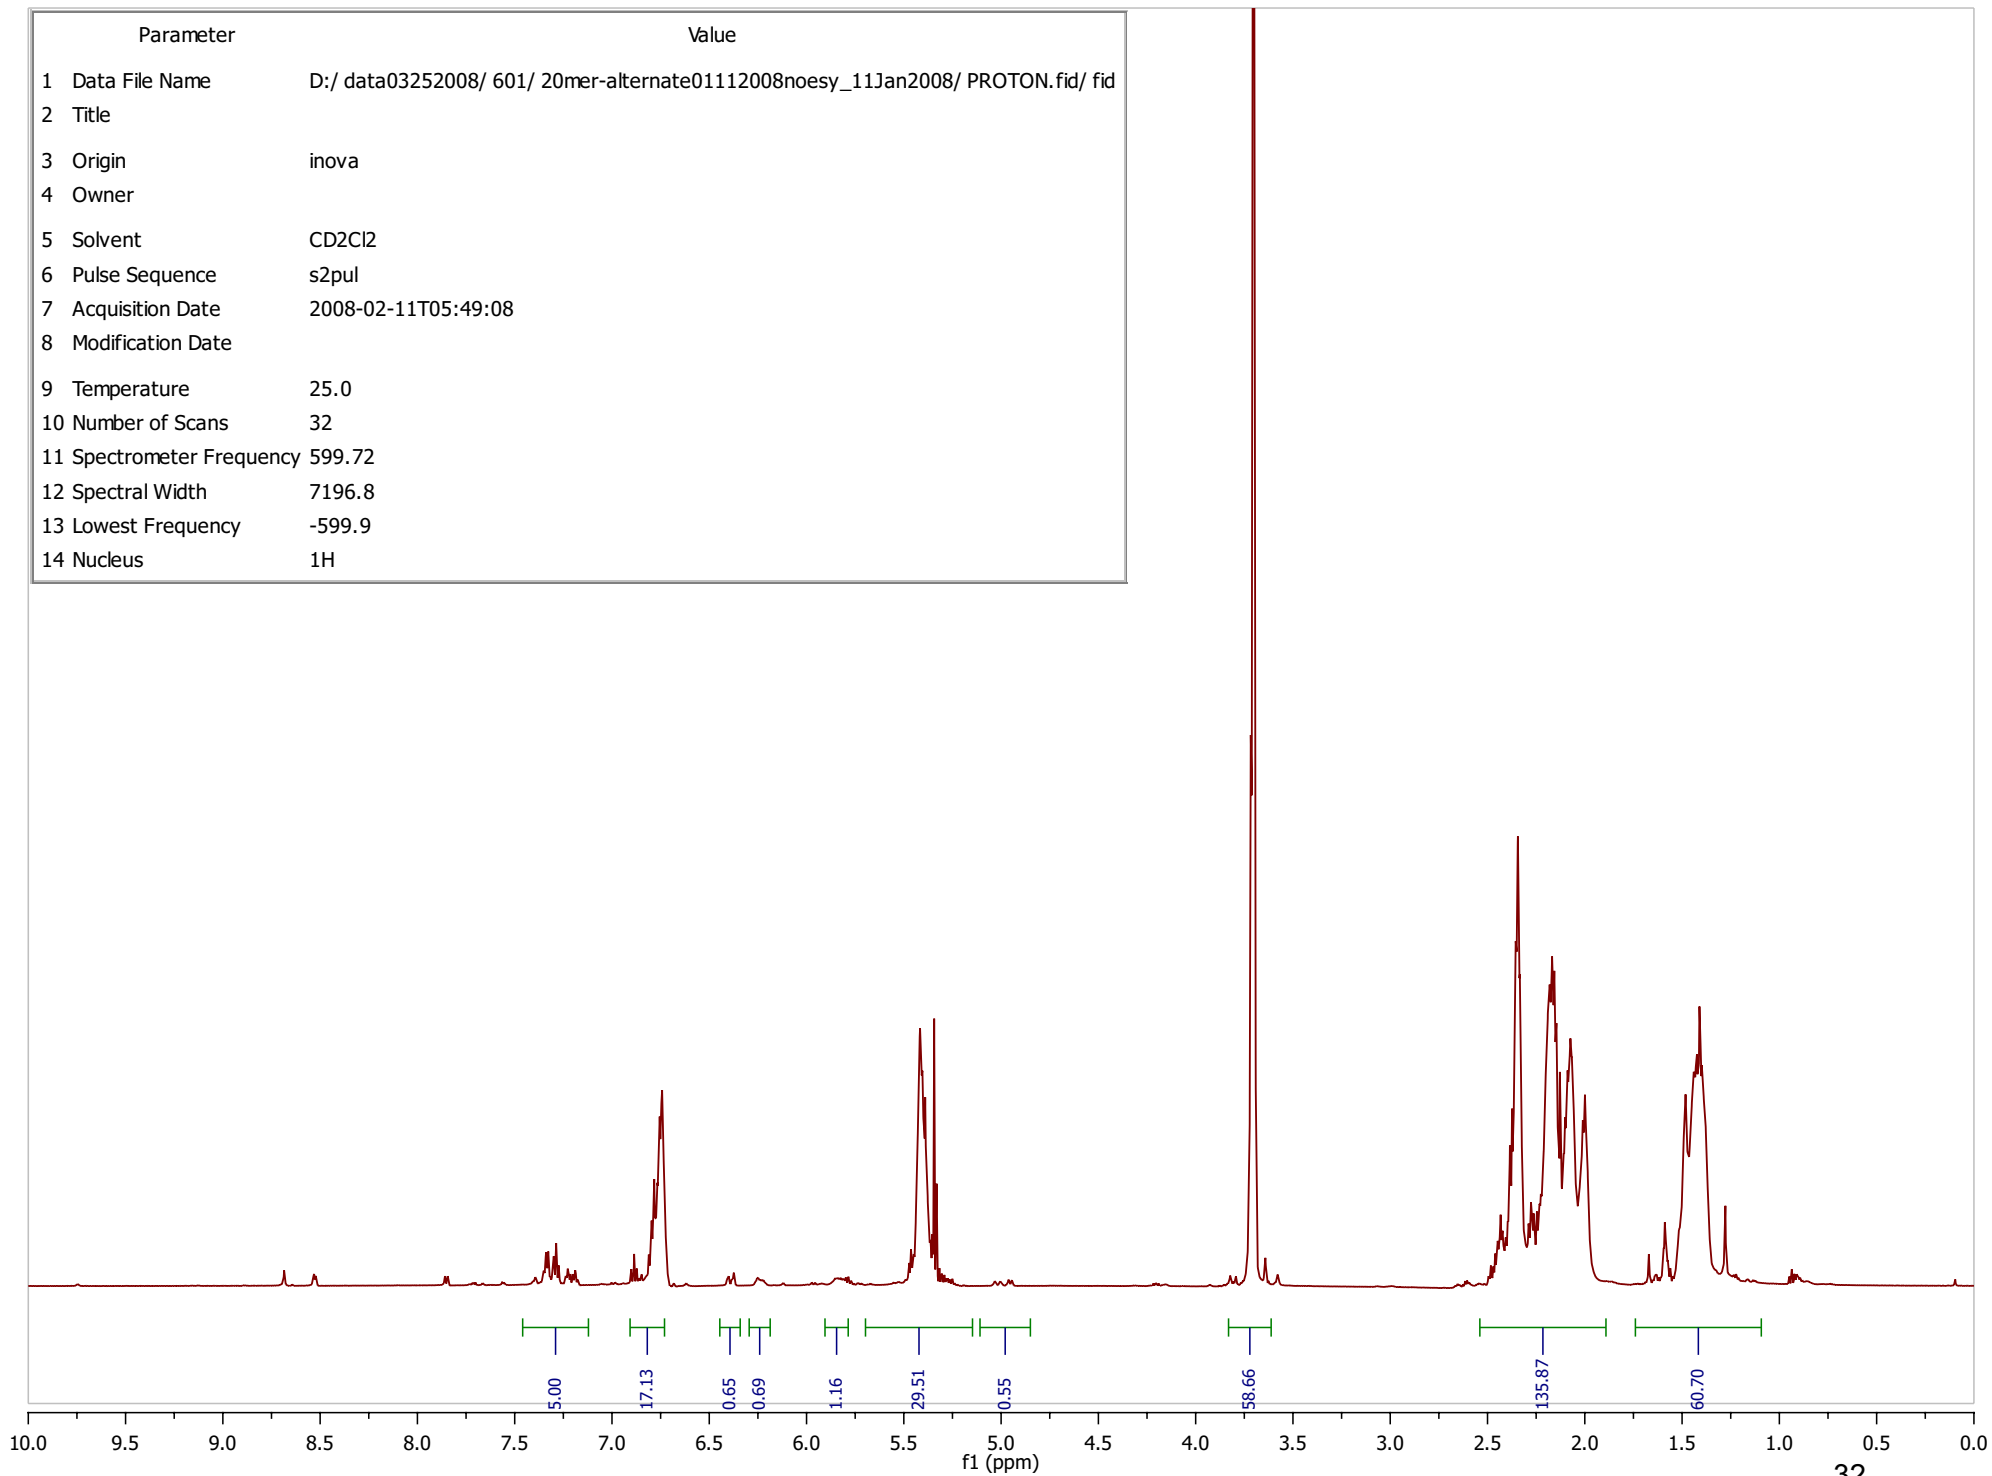



| Parameter                 | Value                                                                                      |
|---------------------------|--------------------------------------------------------------------------------------------|
| 1 Data File Name          | L:/ nmr032508-041508/ 400-0325200804152008/ CBCOOCH3-cyclohexene20merC13-04132008.fid/ fid |
| 2 Title                   | CBCOOCH3-cyclohexene-20mer-C13                                                             |
| 3 Origin                  | inova                                                                                      |
| 4 Owner                   |                                                                                            |
| 5 Solvent                 | CD2Cl2                                                                                     |
| 6 Pulse Sequence          | s2pul                                                                                      |
| 7 Acquisition Date        | 2008-05-12T16:17:15                                                                        |
| 8 Modification Date       |                                                                                            |
| 9 Temperature             | 25.0                                                                                       |
| 10 Number of Scans        | 20432                                                                                      |
| 11 Spectrometer Frequency | 100.55                                                                                     |
| 12 Spectral Width         | 25000.0                                                                                    |
| 13 Lowest Frequency       | -2986.2                                                                                    |
| 14 Nucleus                | 13C                                                                                        |
| 15 Acquired Size          | 29984                                                                                      |
| 16 Spectral Size          | 65536                                                                                      |

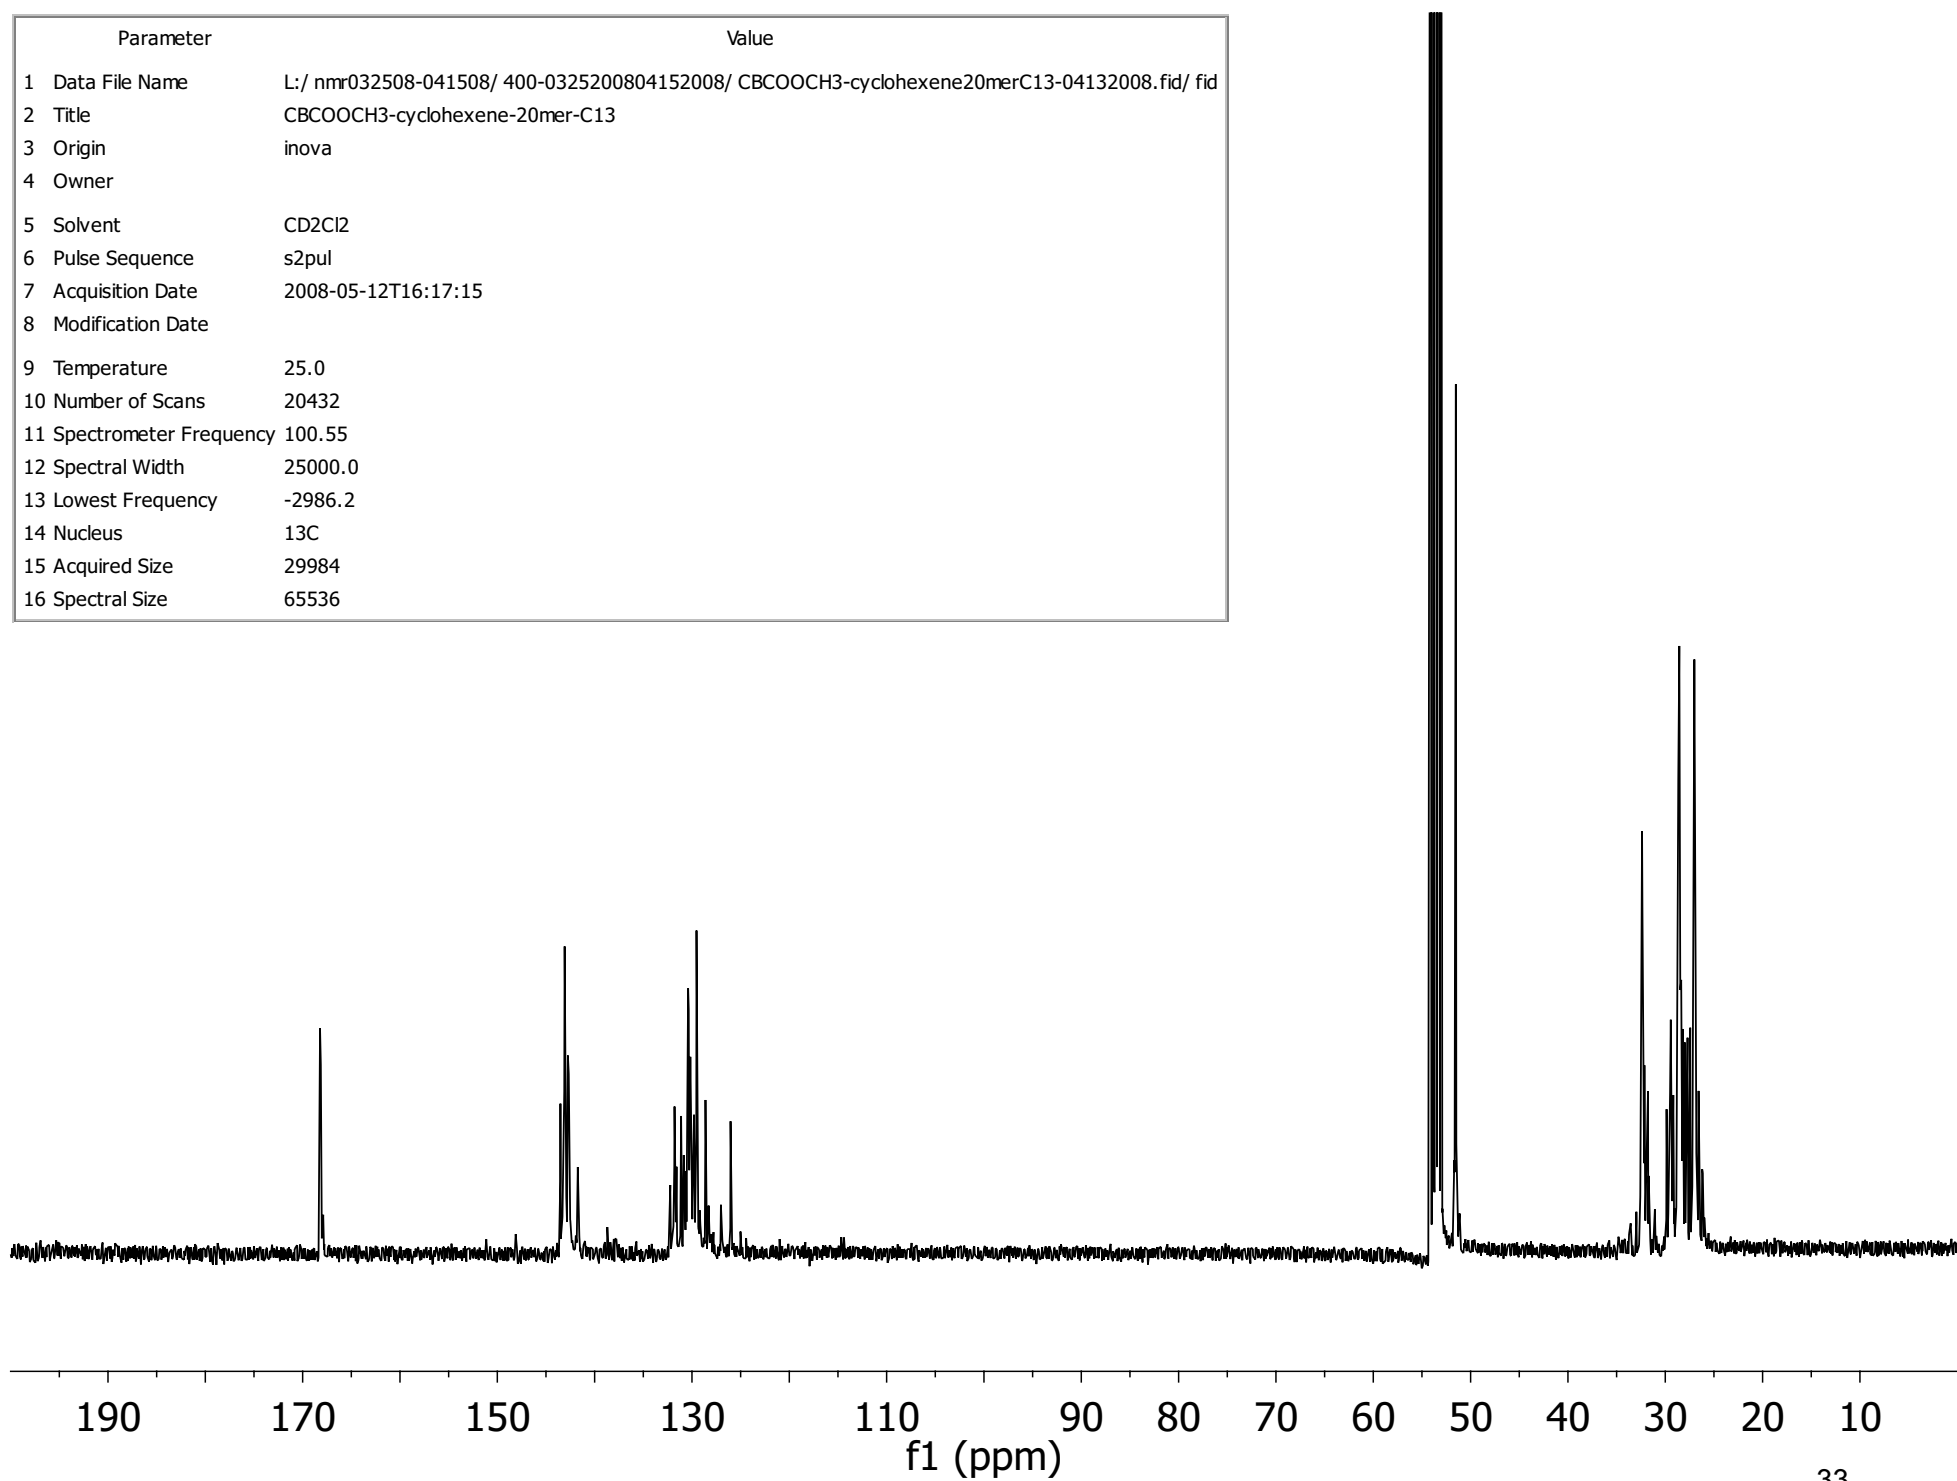

| Parameter                 | Value                                                                         |
|---------------------------|-------------------------------------------------------------------------------|
| 1 Data File Name          | L:/ data03252008/ 400mhz/ CBCOOCH3-cyclohexene-20mer-APTC13-12302007.fid/ fid |
| 2 Title                   | CBCOOCH3-cyclohexene-20mer-APTC13                                             |
| 3 Origin                  | inova                                                                         |
| 4 Owner                   |                                                                               |
| 5 Solvent                 | cdcl3                                                                         |
| 6 Pulse Sequence          | apt                                                                           |
| 7 Acquisition Date        | 2008-01-28T12:08:37                                                           |
| 8 Modification Date       |                                                                               |
| 9 Temperature             | 25.0                                                                          |
| 10 Number of Scans        | 72808                                                                         |
| 11 Spectrometer Frequency | 100.55                                                                        |
| 12 Spectral Width         | 29996.2                                                                       |
| 13 Lowest Frequency       | -5484.3                                                                       |
| 14 Nucleus                | 13C                                                                           |
| 15 Acquired Size          | 35976                                                                         |
| 16 Spectral Size          | 131072                                                                        |

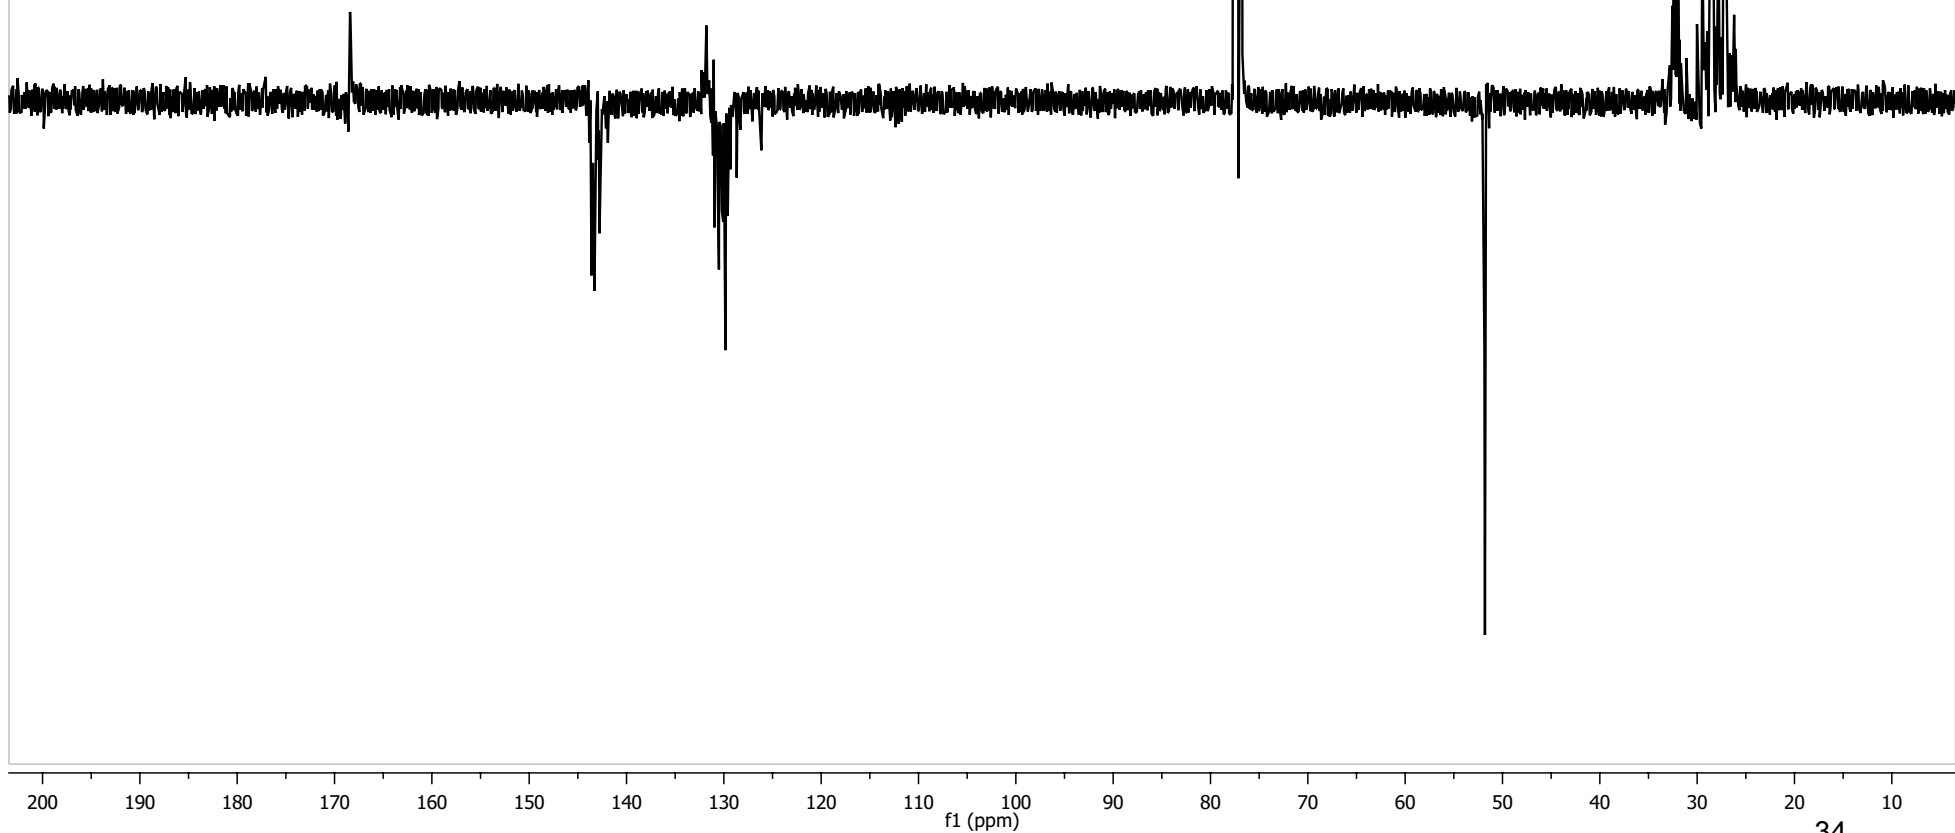

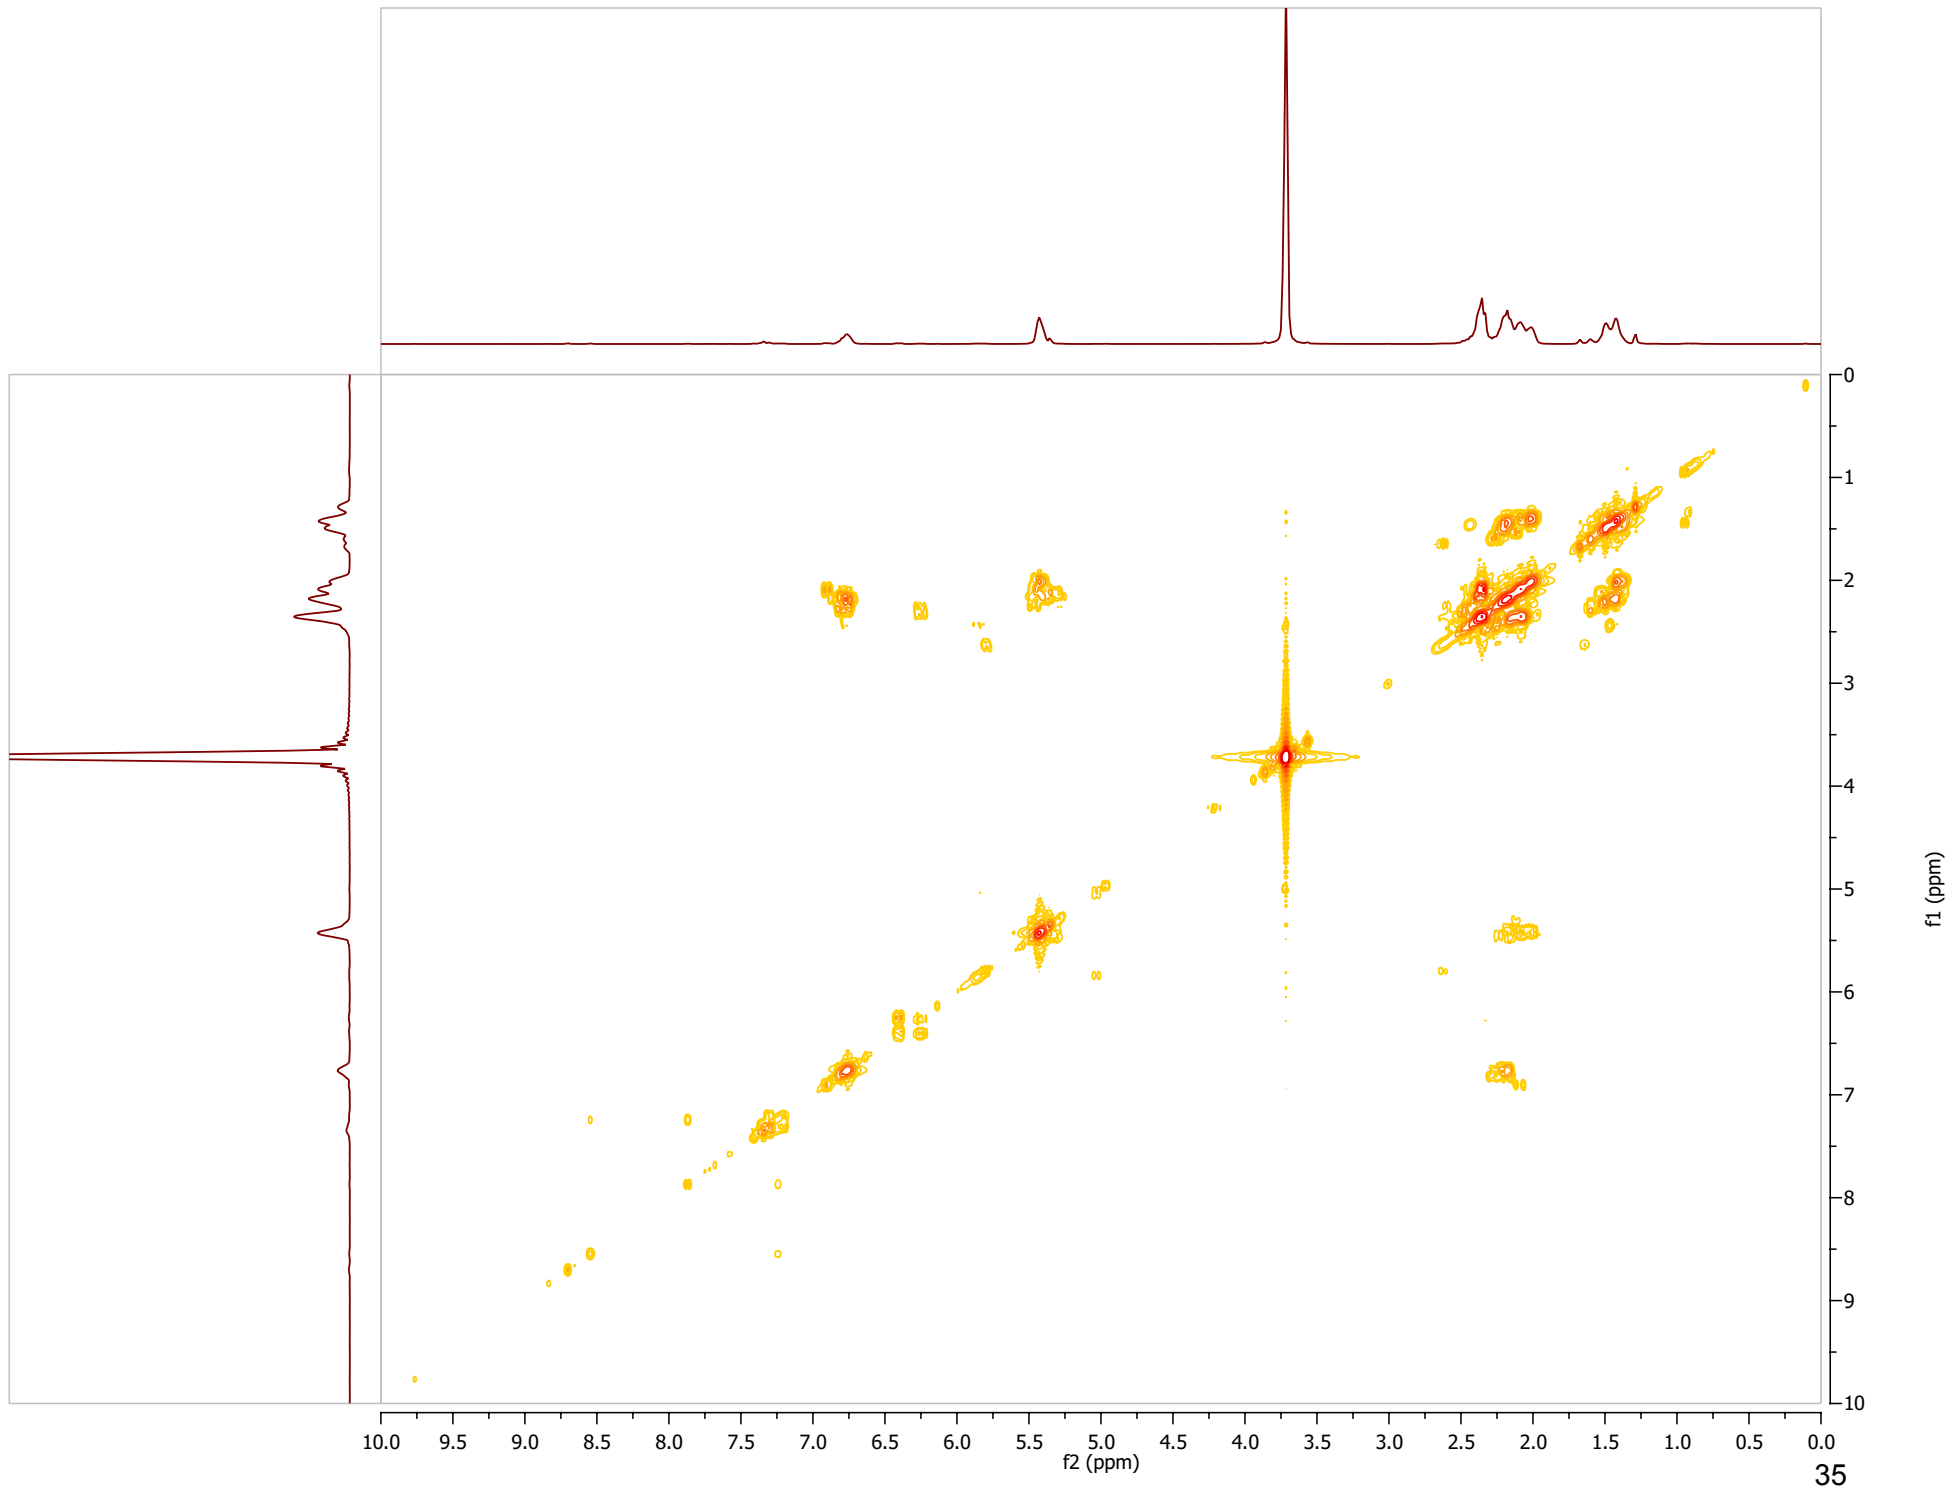



| Parameter                 | Value                                                                                                        |
|---------------------------|--------------------------------------------------------------------------------------------------------------|
| 1 Data File Name          | L:/ nmr04162008-07012008/ CBCOOCH3-cyclohexene-50mer04242008.fid/ fid                                        |
| 2 Title                   | STATE UNIVERSITY OF NEW YORKINOVA 400 Mhz SN# S011617ASWpfg PROBE SN# P0051331H SENSITIVITY0.1% ETHYLBENZENE |
| 3 Origin                  | inova                                                                                                        |
| 4 Owner                   |                                                                                                              |
| 5 Solvent                 | CD2Cl2                                                                                                       |
| 6 Pulse Sequence          | s2pul                                                                                                        |
| 7 Acquisition Date        | 2008-05-25T06:03:10                                                                                          |
| 8 Modification Date       |                                                                                                              |
| 9 Temperature             | 25.0                                                                                                         |
| 10 Number of Scans        | 24                                                                                                           |
| 11 Spectrometer Frequency | 399.83                                                                                                       |
| 12 Spectral Width         | 6000.6                                                                                                       |
| 13 Lowest Frequency       | -1000.8                                                                                                      |
| 14 Nucleus                | 1H                                                                                                           |
| 15 Acquired Size          | 19637                                                                                                        |
| 16 Spectral Size          | 65536                                                                                                        |

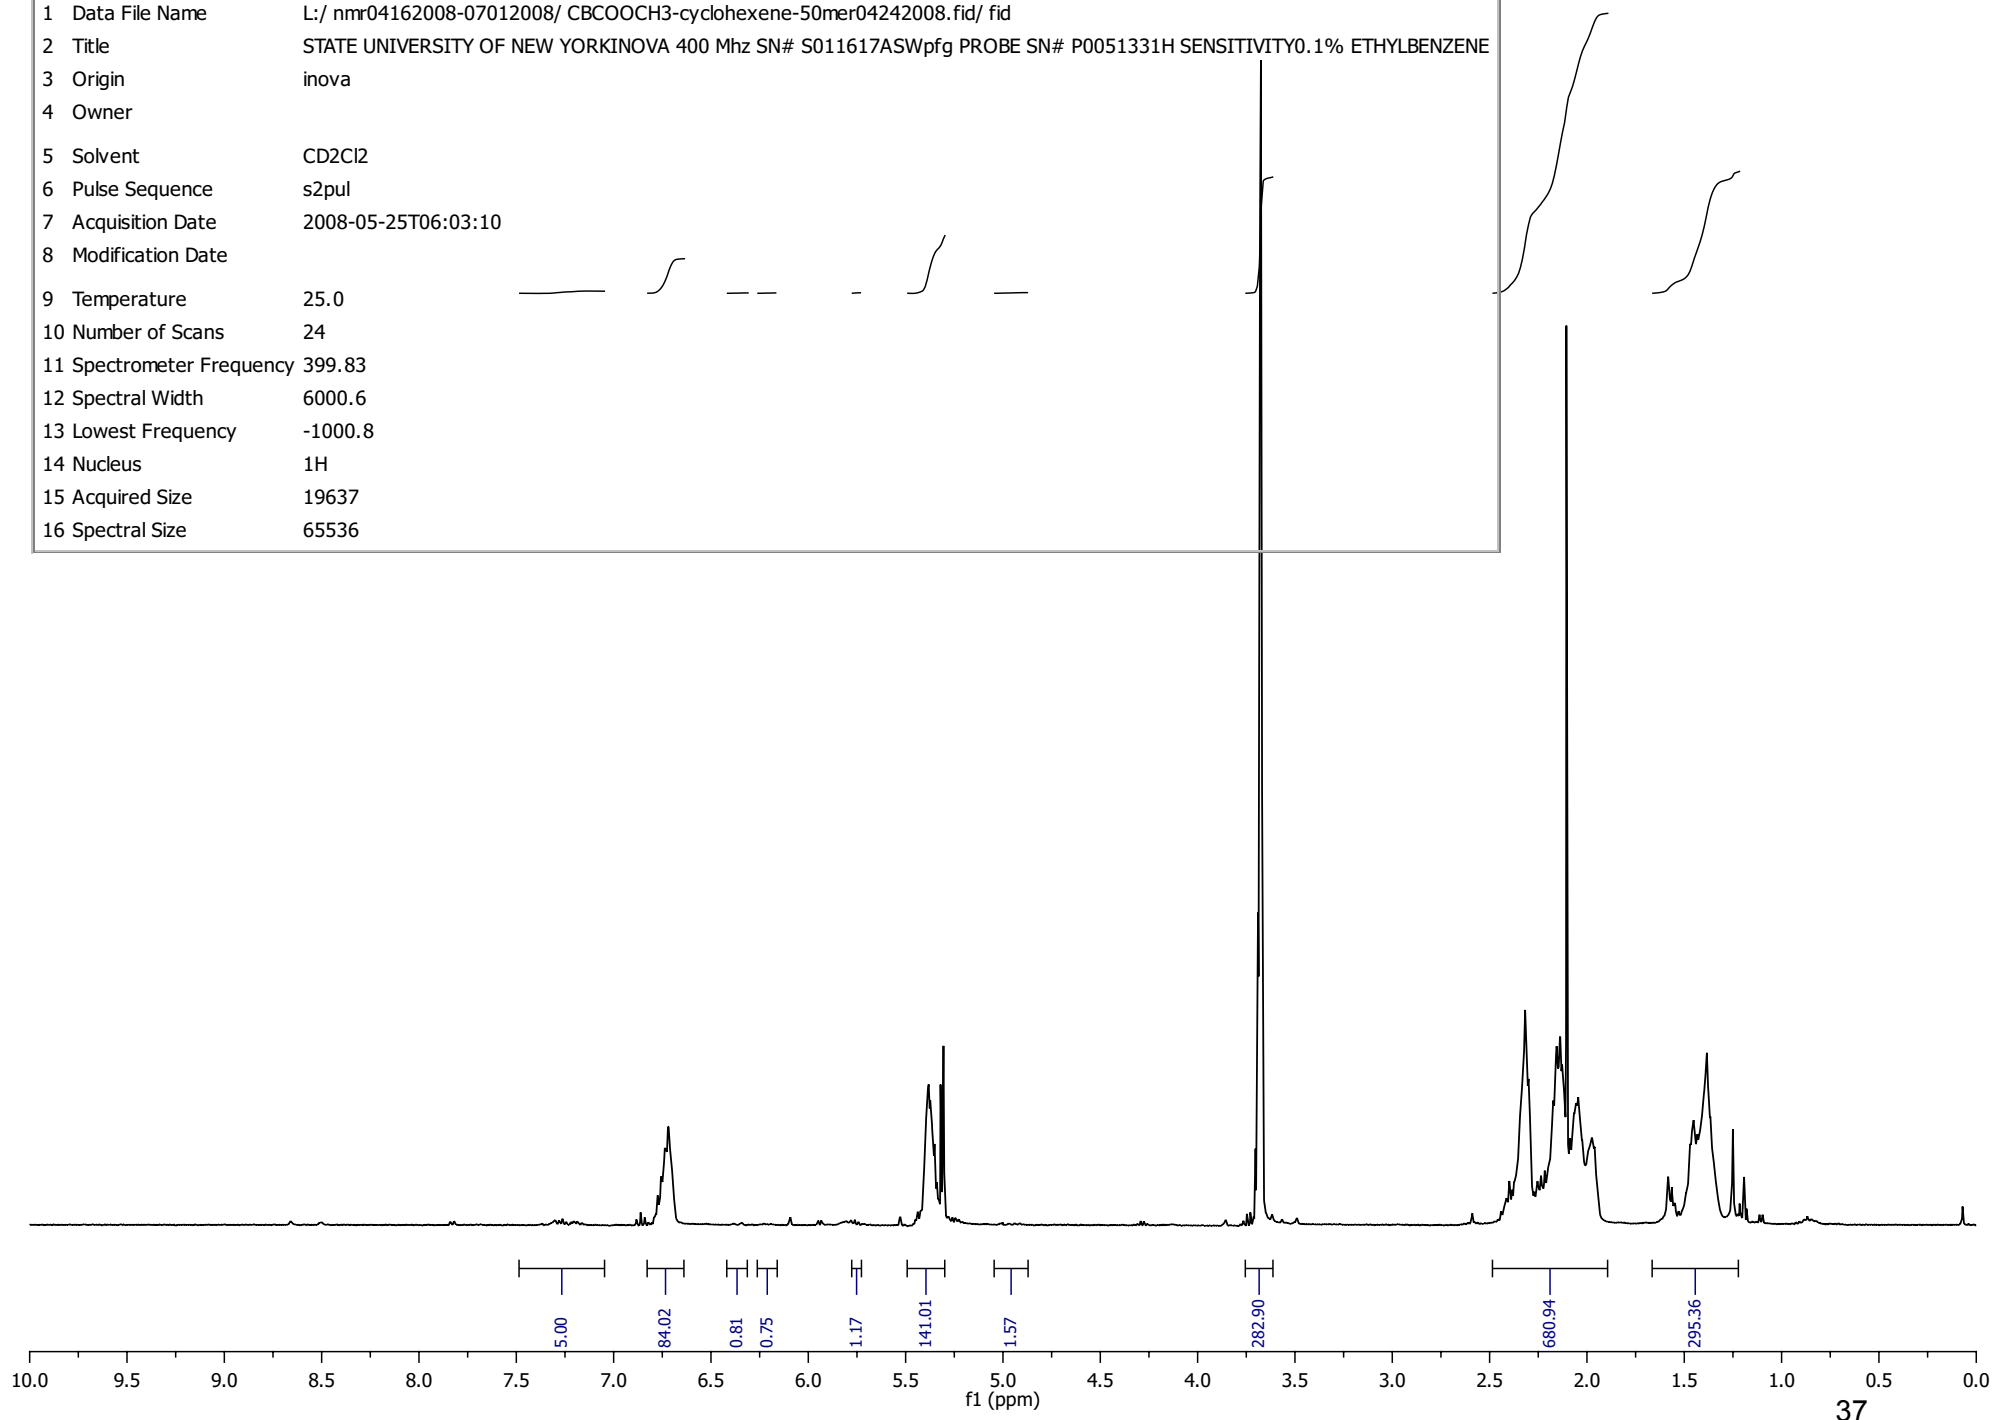

| Parameter                 | Value                                                                                                  |
|---------------------------|--------------------------------------------------------------------------------------------------------|
| 1 Data File Name          | J:/ flash-backup/ nmr032508-041508/ 600-0325200804152008/ CBCOOCH3-cyclohexene-100mer04122008.fid/ fid |
| 2 Title                   | STANDARD PROTON PARAMETERS                                                                             |
| 3 Origin                  | inova                                                                                                  |
| 4 Owner                   |                                                                                                        |
| 5 Solvent                 | CD2Cl2                                                                                                 |
| 6 Pulse Sequence          | s2pul                                                                                                  |
| 7 Acquisition Date        | 2008-05-12T11:07:10                                                                                    |
| 8 Modification Date       |                                                                                                        |
| 9 Temperature             | 25.0                                                                                                   |
| 10 Number of Scans        | 16                                                                                                     |
| 11 Spectrometer Frequency | 599.72                                                                                                 |
| 12 Spectral Width         | 8000.0                                                                                                 |
| 13 Lowest Frequency       | -1001.2                                                                                                |
| 14 Nucleus                | 1H                                                                                                     |
| 15 Acquired Size          | 15136                                                                                                  |
| 16 Spectral Size          | 32768                                                                                                  |

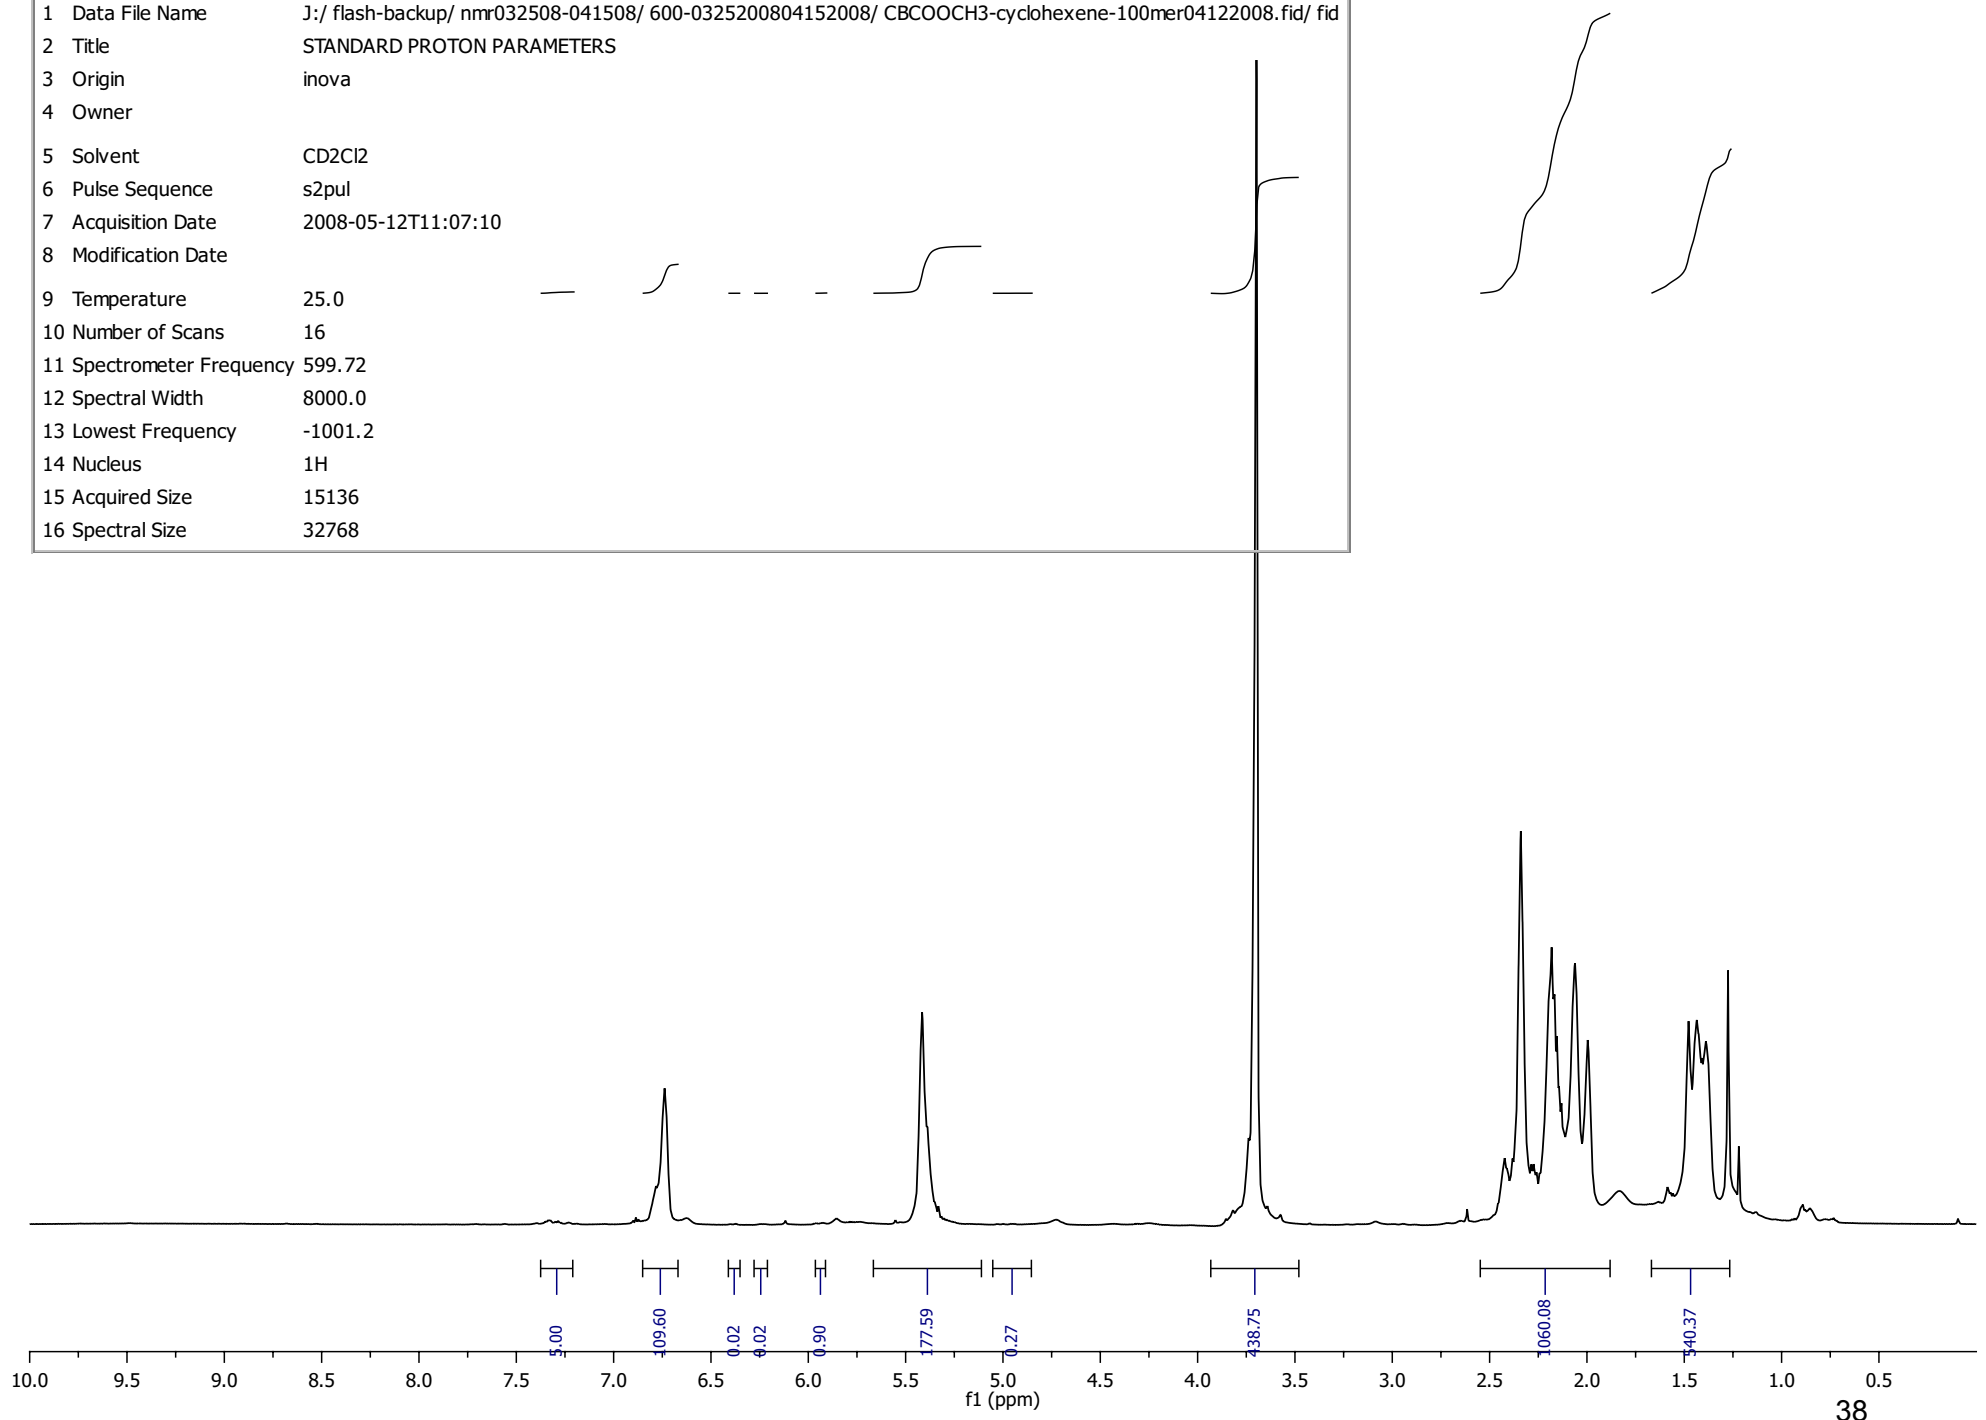

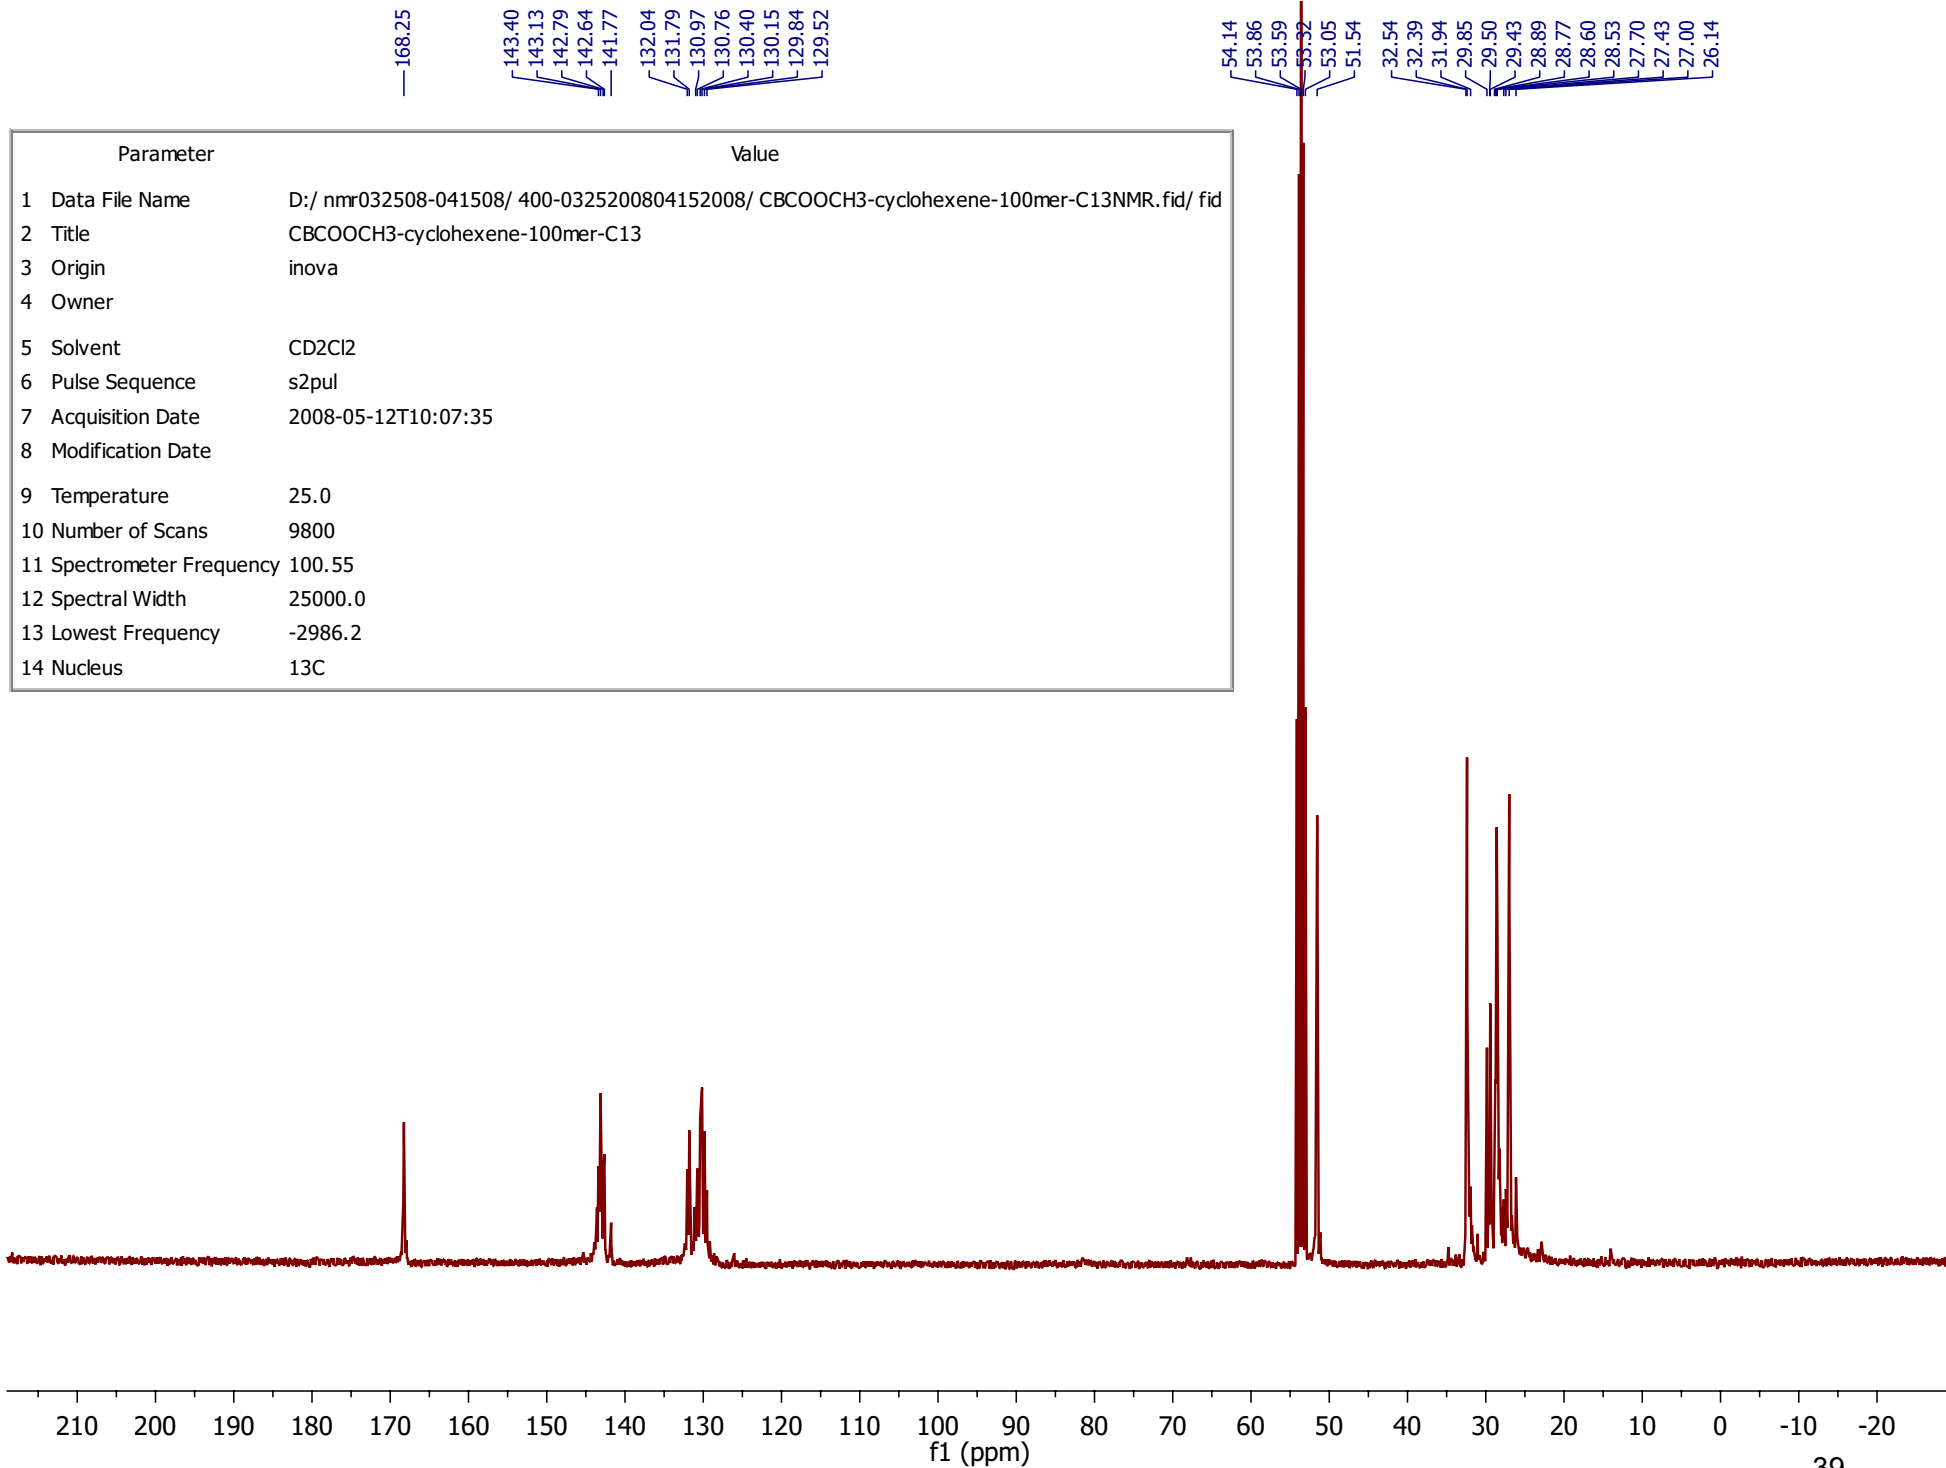

| Parameter                 | Value                                                             |
|---------------------------|-------------------------------------------------------------------|
| 1 Data File Name          | L:/ nmr04162008-07012008/ CBCOOCH3-cyclohexene-200mer.fid/<br>fid |
| 2 Title                   | CBCOOCH3-cyclohexene-200mer                                       |
| 3 Origin                  | inova                                                             |
| 4 Owner                   |                                                                   |
| 5 Solvent                 | CD2Cl2                                                            |
| 6 Pulse Sequence          | s2pul                                                             |
| 7 Acquisition Date        | 2008-05-25T05:54:49                                               |
| 8 Modification Date       |                                                                   |
| 9 Temperature             | 25.0                                                              |
| 10 Number of Scans        | 32                                                                |
| 11 Spectrometer Frequency | 399.83                                                            |
| 12 Spectral Width         | 6000.6                                                            |
| 13 Lowest Frequency       | -1000.8                                                           |
| 14 Nucleus                | 1H                                                                |
| 15 Acquired Size          | 19637                                                             |

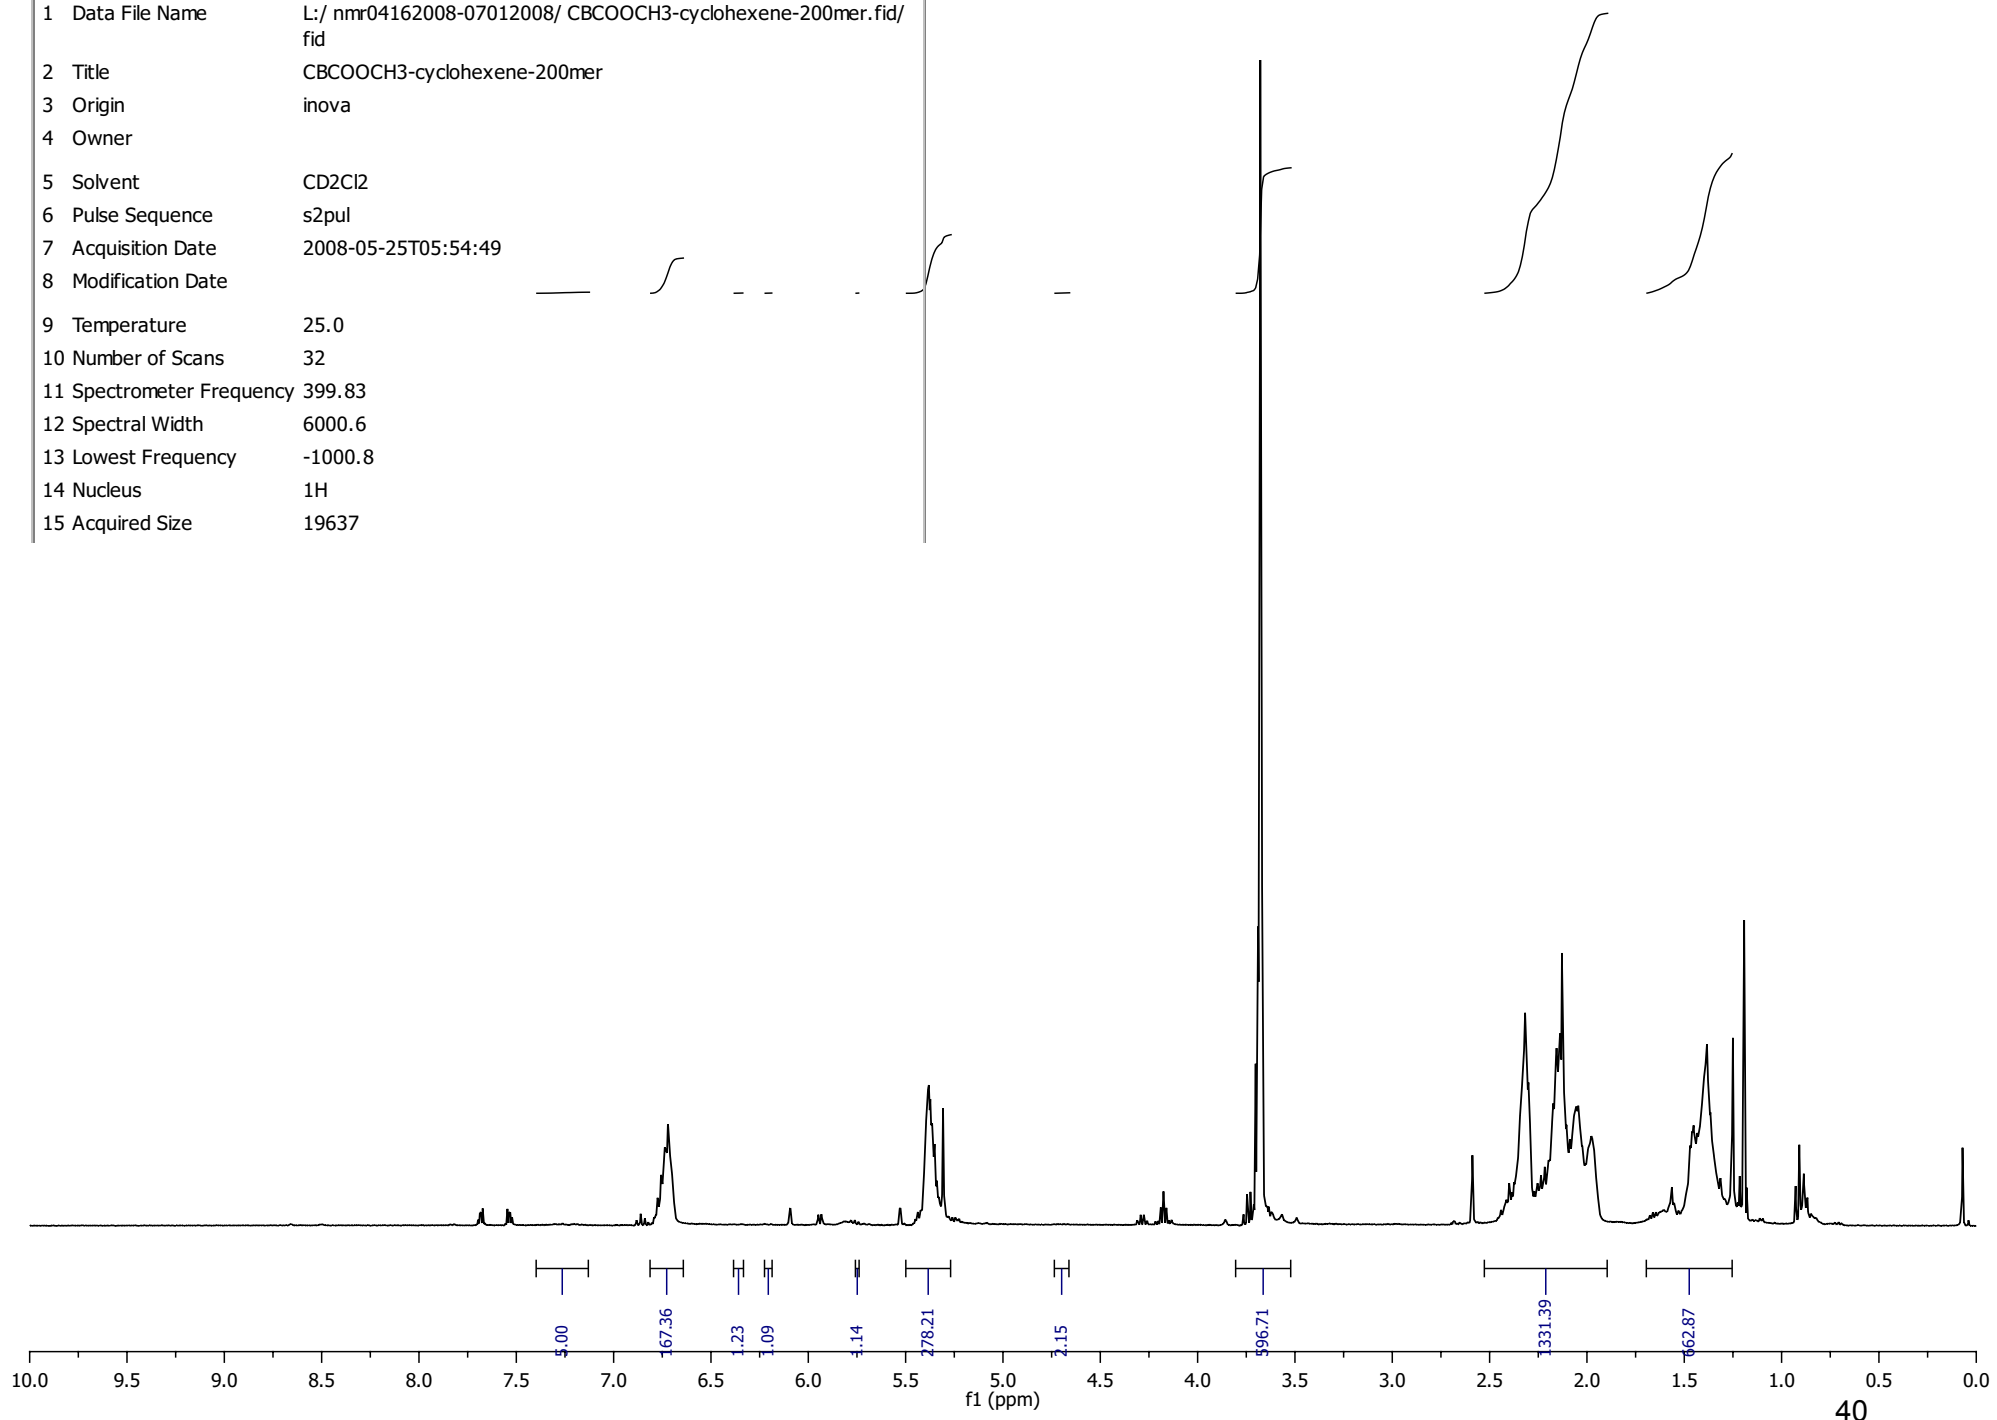



| Parameter                 | Value                                                                             |
|---------------------------|-----------------------------------------------------------------------------------|
| 1 Data File Name          | L:/ nmr04162008-07012008/ CBCOOCH3-4-cyclohexenemethylether20mer06222008.fid/ fid |
| 2 Title                   | CBCOOCH3-4-cyclohexenemethylether20mer                                            |
| 3 Origin                  | inova                                                                             |
| 4 Owner                   |                                                                                   |
| 5 Solvent                 | CD2Cl2                                                                            |
| 6 Pulse Sequence          | s2pul                                                                             |
| 7 Acquisition Date        | 2008-07-23T11:26:02                                                               |
| 8 Modification Date       |                                                                                   |
| 9 Temperature             | 25.0                                                                              |
| 10 Number of Scans        | 56                                                                                |
| 11 Spectrometer Frequency | 499.90                                                                            |
| 12 Spectral Width         | 8003.2                                                                            |
| 13 Lowest Frequency       | -1002.3                                                                           |
| 14 Nucleus                | 1H                                                                                |
| 15 Acquired Size          | 15136                                                                             |
| 16 Spectral Size          | 32768                                                                             |

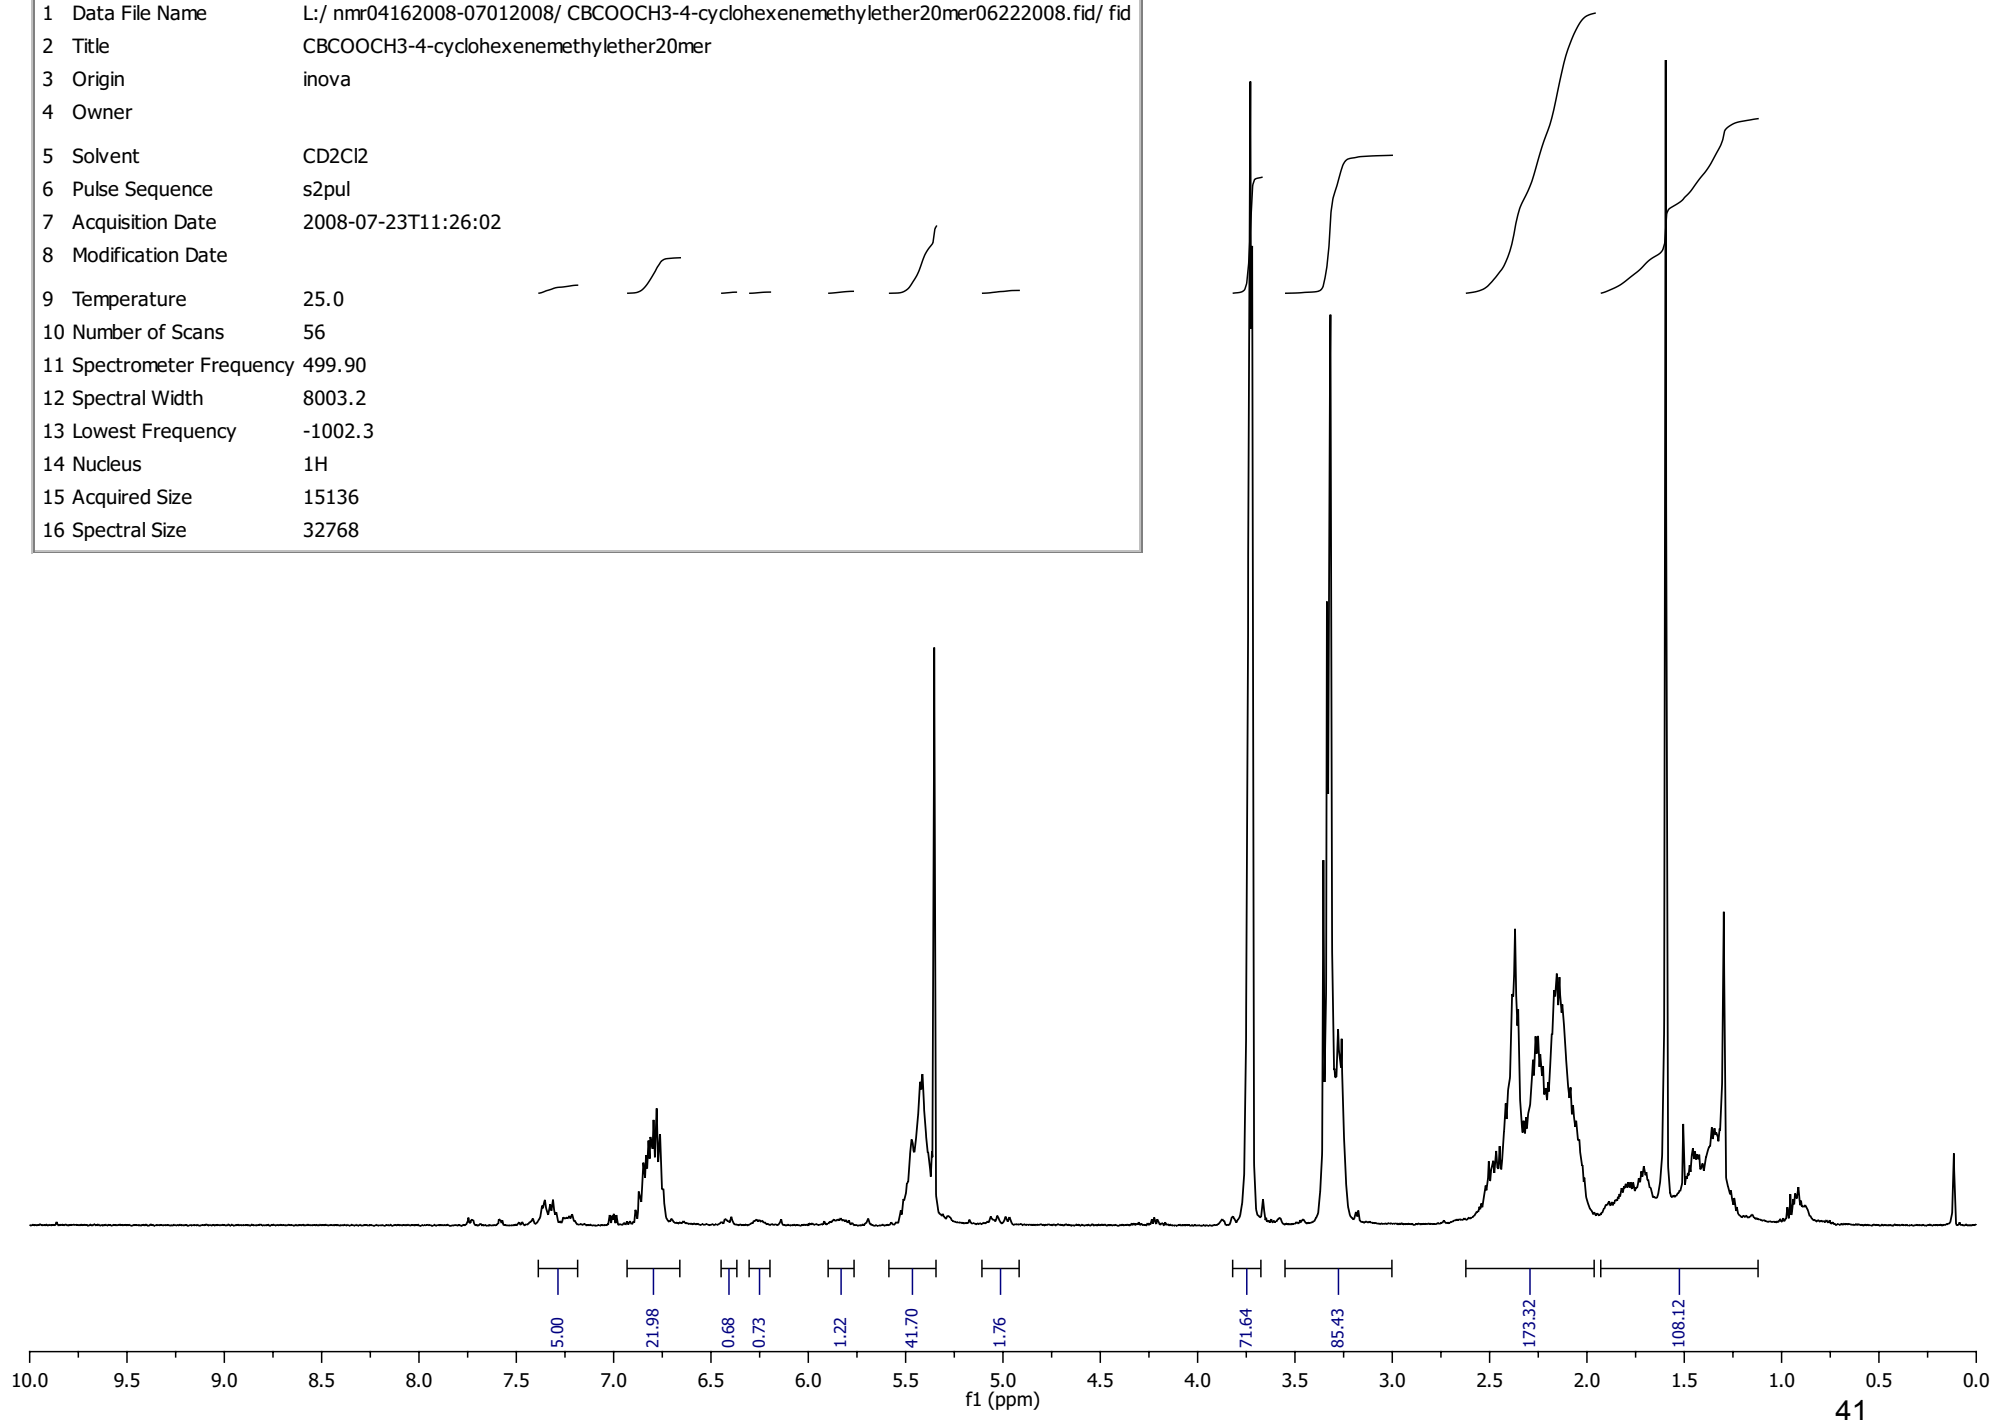

| Parameter                 | Value                                                                                   |
|---------------------------|-----------------------------------------------------------------------------------------|
| 1 Data File Name          | / Volumes/ KINGSTON/ nmr04162008-07012008/ CBCOOCH3-C6D10-20mer24equiv06302008.fid/ fid |
| 2 Title                   | CBCOOCH3-C6D10-20mer24equiv06302008                                                     |
| 3 Origin                  | inova                                                                                   |
| 4 Owner                   |                                                                                         |
| 5 Solvent                 | CD2Cl2                                                                                  |
| 6 Pulse Sequence          | s2pul                                                                                   |
| 7 Acquisition Date        | 2008-07-30T20:38:19                                                                     |
| 8 Modification Date       |                                                                                         |
| 9 Temperature             | 25.0                                                                                    |
| 10 Number of Scans        | 72                                                                                      |
| 11 Spectrometer Frequency | 499.90                                                                                  |
| 12 Spectral Width         | 8003.2                                                                                  |
| 13 Lowest Frequency       | -1002.3                                                                                 |
| 14 Nucleus                | 1H                                                                                      |
| 15 Acquired Size          | 15136                                                                                   |
| 16 Spectral Size          | 32768                                                                                   |

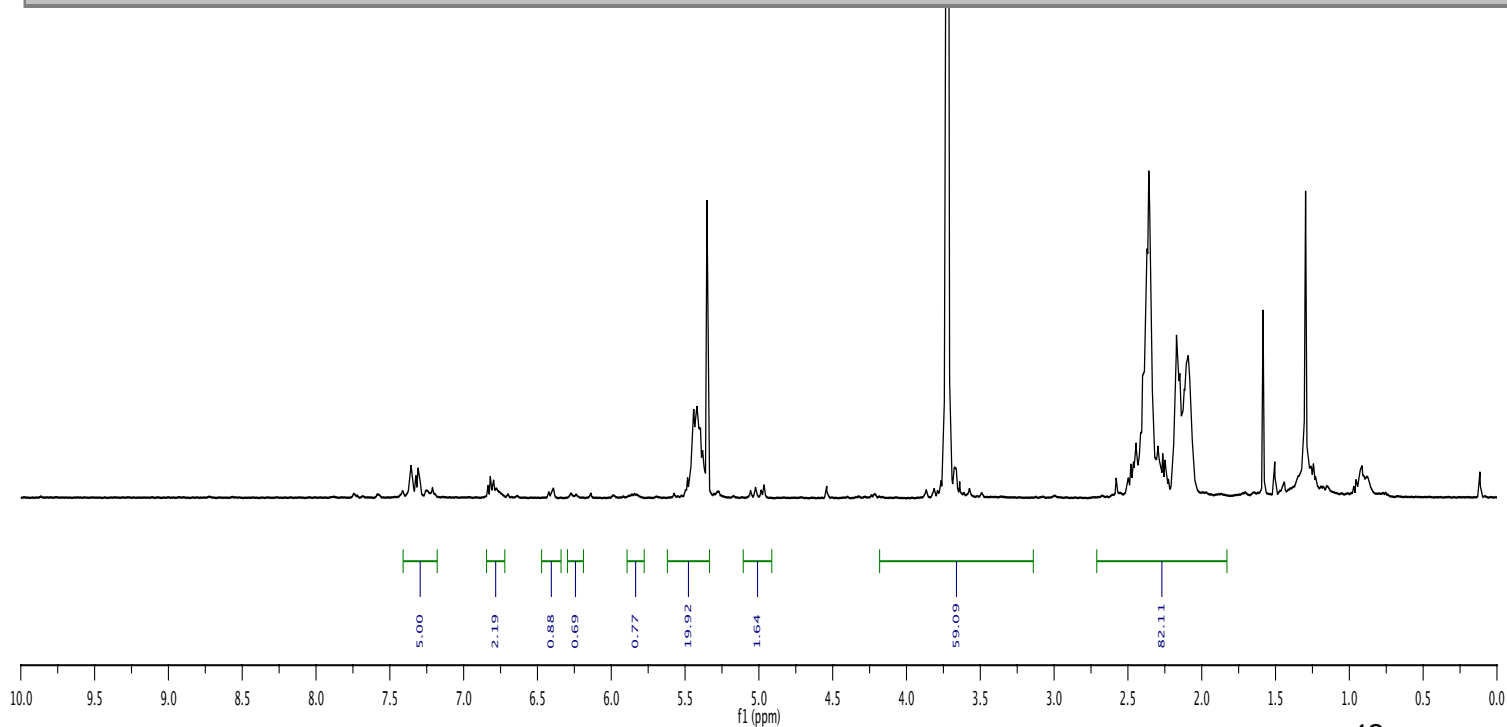

| Parameter                 | Value                                                                |
|---------------------------|----------------------------------------------------------------------|
| 1 Data File Name          | L:/ data03252008/ 500mhz/ CBCOOPh-cyclohexene-20mer02122008.fid/ fid |
| 2 Title                   | CBCOOPh-cyclohexene-20mer02122008                                    |
| 3 Origin                  | inova                                                                |
| 4 Owner                   |                                                                      |
| 5 Solvent                 | CD2Cl2                                                               |
| 6 Pulse Sequence          | s2pul                                                                |
| 7 Acquisition Date        | 2008-03-12T05:31:18                                                  |
| 8 Modification Date       |                                                                      |
| 9 Temperature             | 25.0                                                                 |
| 10 Number of Scans        | 100                                                                  |
| 11 Spectrometer Frequency | 499.90                                                               |
| 12 Spectral Width         | 8003.2                                                               |
| 13 Lowest Frequency       | -1002.3                                                              |
| 14 Nucleus                | 1H                                                                   |
| 15 Acquired Size          | 15136                                                                |
| 16 Spectral Size          | 32768                                                                |

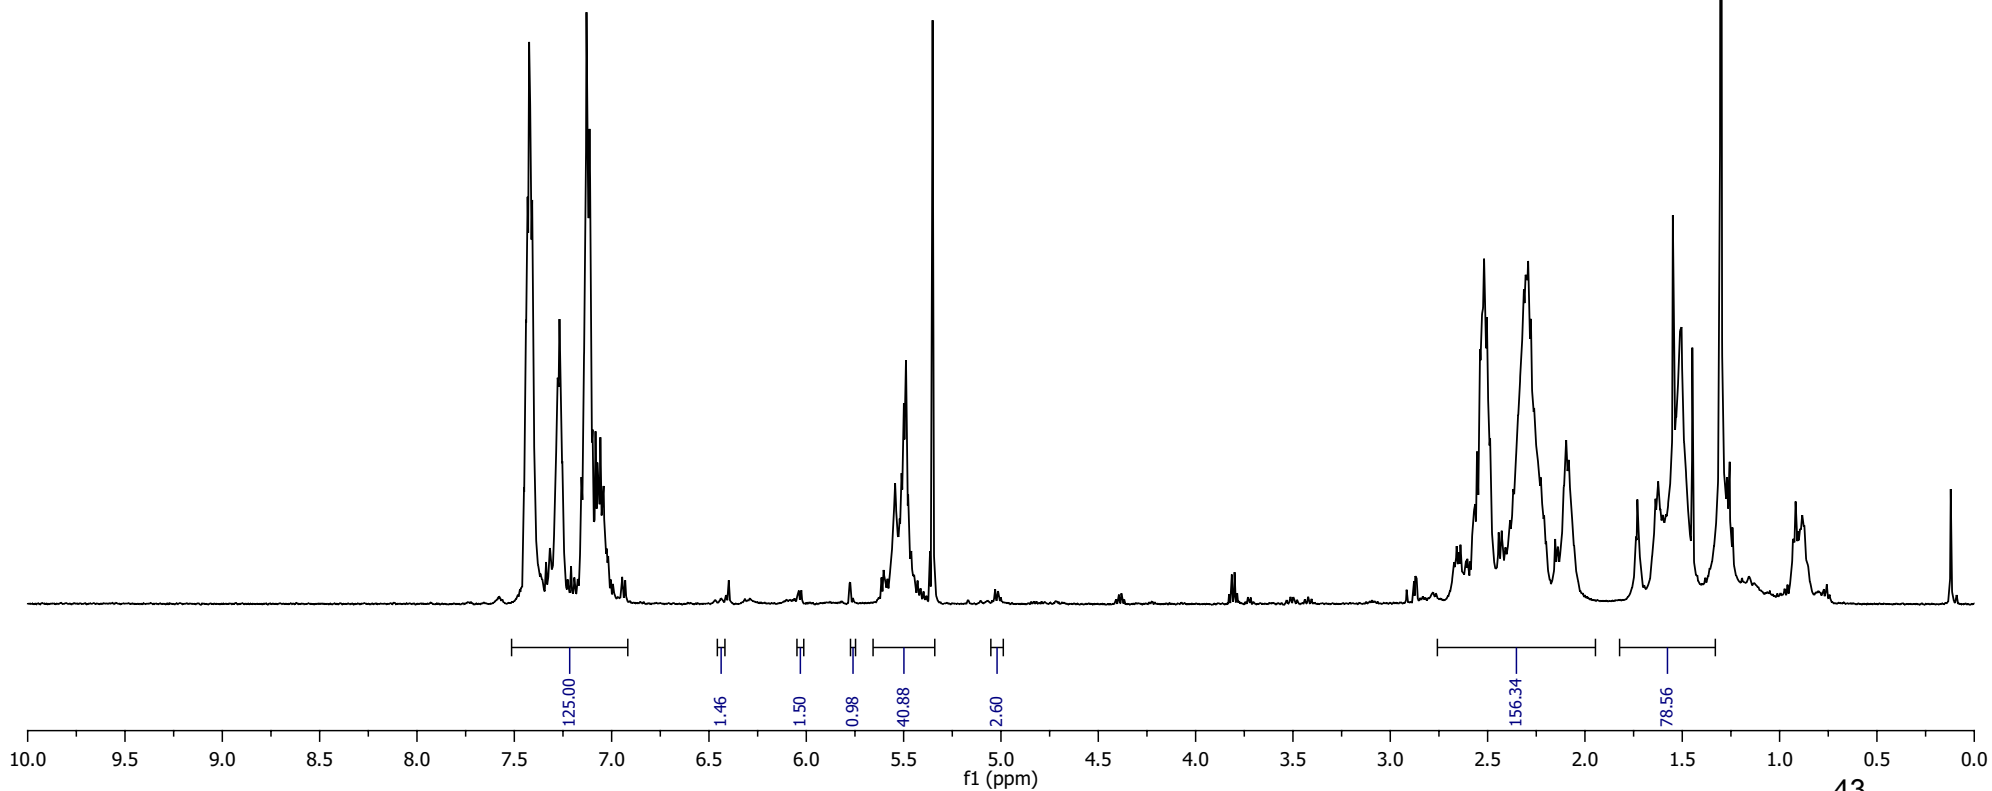

| Parameter                 | Value                                               |
|---------------------------|-----------------------------------------------------|
| 1 Data File Name          | L:/07012008-07112008/CBCOOCH3-1mer07112008.fid/ fid |
| 2 Title                   | CBCOOCH3-1mer07112008                               |
| 3 Origin                  | inova                                               |
| 4 Owner                   |                                                     |
| 5 Solvent                 | CD2Cl2                                              |
| 6 Pulse Sequence          | s2pul                                               |
| 7 Acquisition Date        | 2008-08-11T07:20:11                                 |
| 8 Modification Date       |                                                     |
| 9 Temperature             | 25.0                                                |
| 10 Number of Scans        | 24                                                  |
| 11 Spectrometer Frequency | 599.72                                              |
| 12 Spectral Width         | 8000.0                                              |
| 13 Lowest Frequency       | -1001.2                                             |
| 14 Nucleus                | 1H                                                  |
| 15 Acquired Size          | 15136                                               |
| 16 Spectral Size          | 32768                                               |

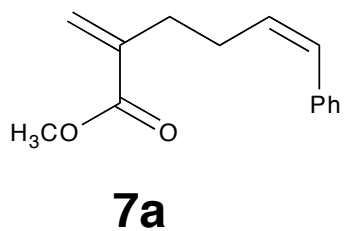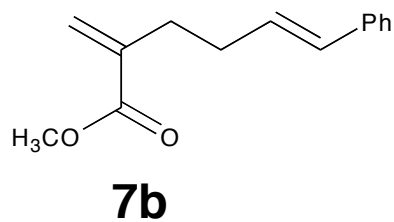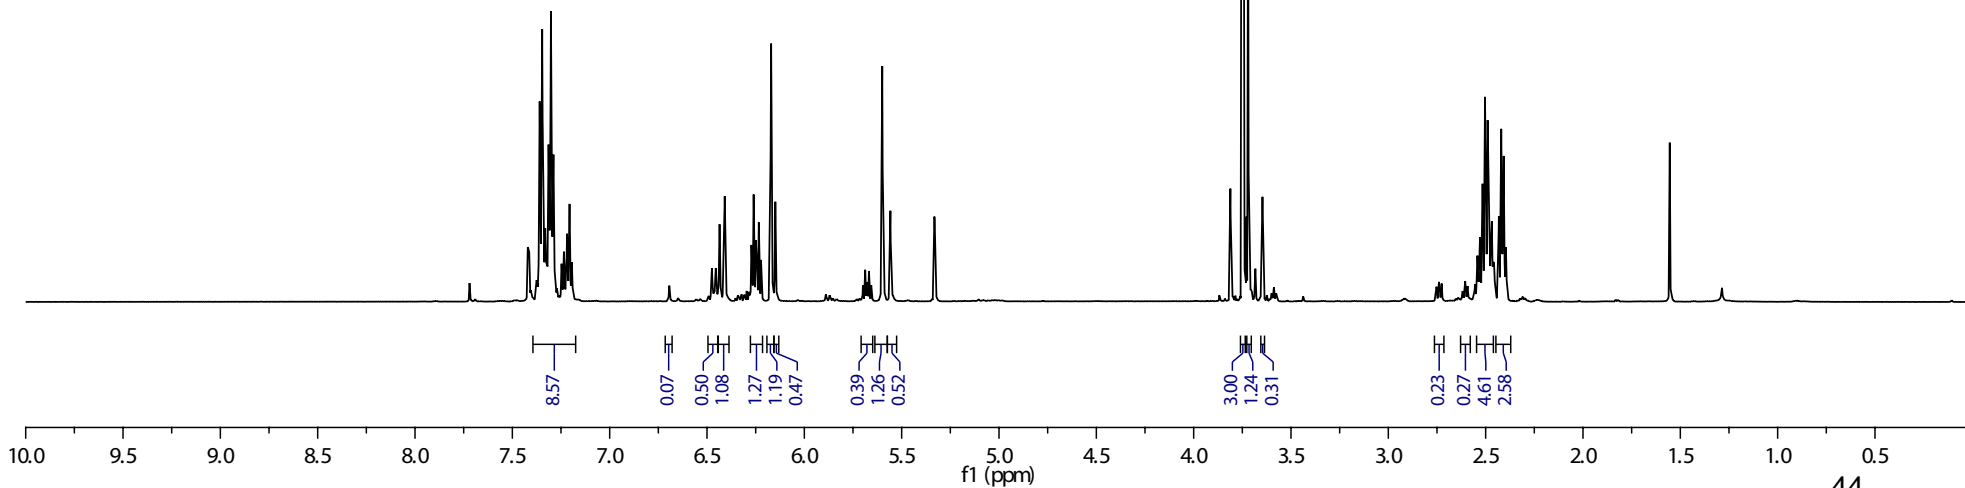

| Parameter                 | Value                                                     |
|---------------------------|-----------------------------------------------------------|
| 1 Data File Name          | F:/ 07012008-07112008/ CBCOOCHB-1merC13-07112008.fid/ fid |
| 2 Title                   | CBCOOCHB-1merC13-07112008                                 |
| 3 Origin                  | inova                                                     |
| 4 Owner                   |                                                           |
| 5 Solvent                 | CD2Cl2                                                    |
| 6 Pulse Sequence          | s2pul                                                     |
| 7 Acquisition Date        | 2008-08-11T07:22:49                                       |
| 8 Modification Date       |                                                           |
| 9 Temperature             | 25.0                                                      |
| 10 Number of Scans        | 1760                                                      |
| 11 Spectrometer Frequency | 100.55                                                    |
| 12 Spectral Width         | 25000.0                                                   |
| 13 Lowest Frequency       | -2986.2                                                   |
| 14 Nucleus                | <sup>13</sup> C                                           |
| 15 Acquired Size          | 29984                                                     |
| 16 Spectral Size          | 65536                                                     |

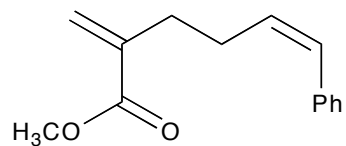

**7a**

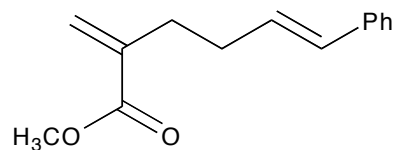

**7b**

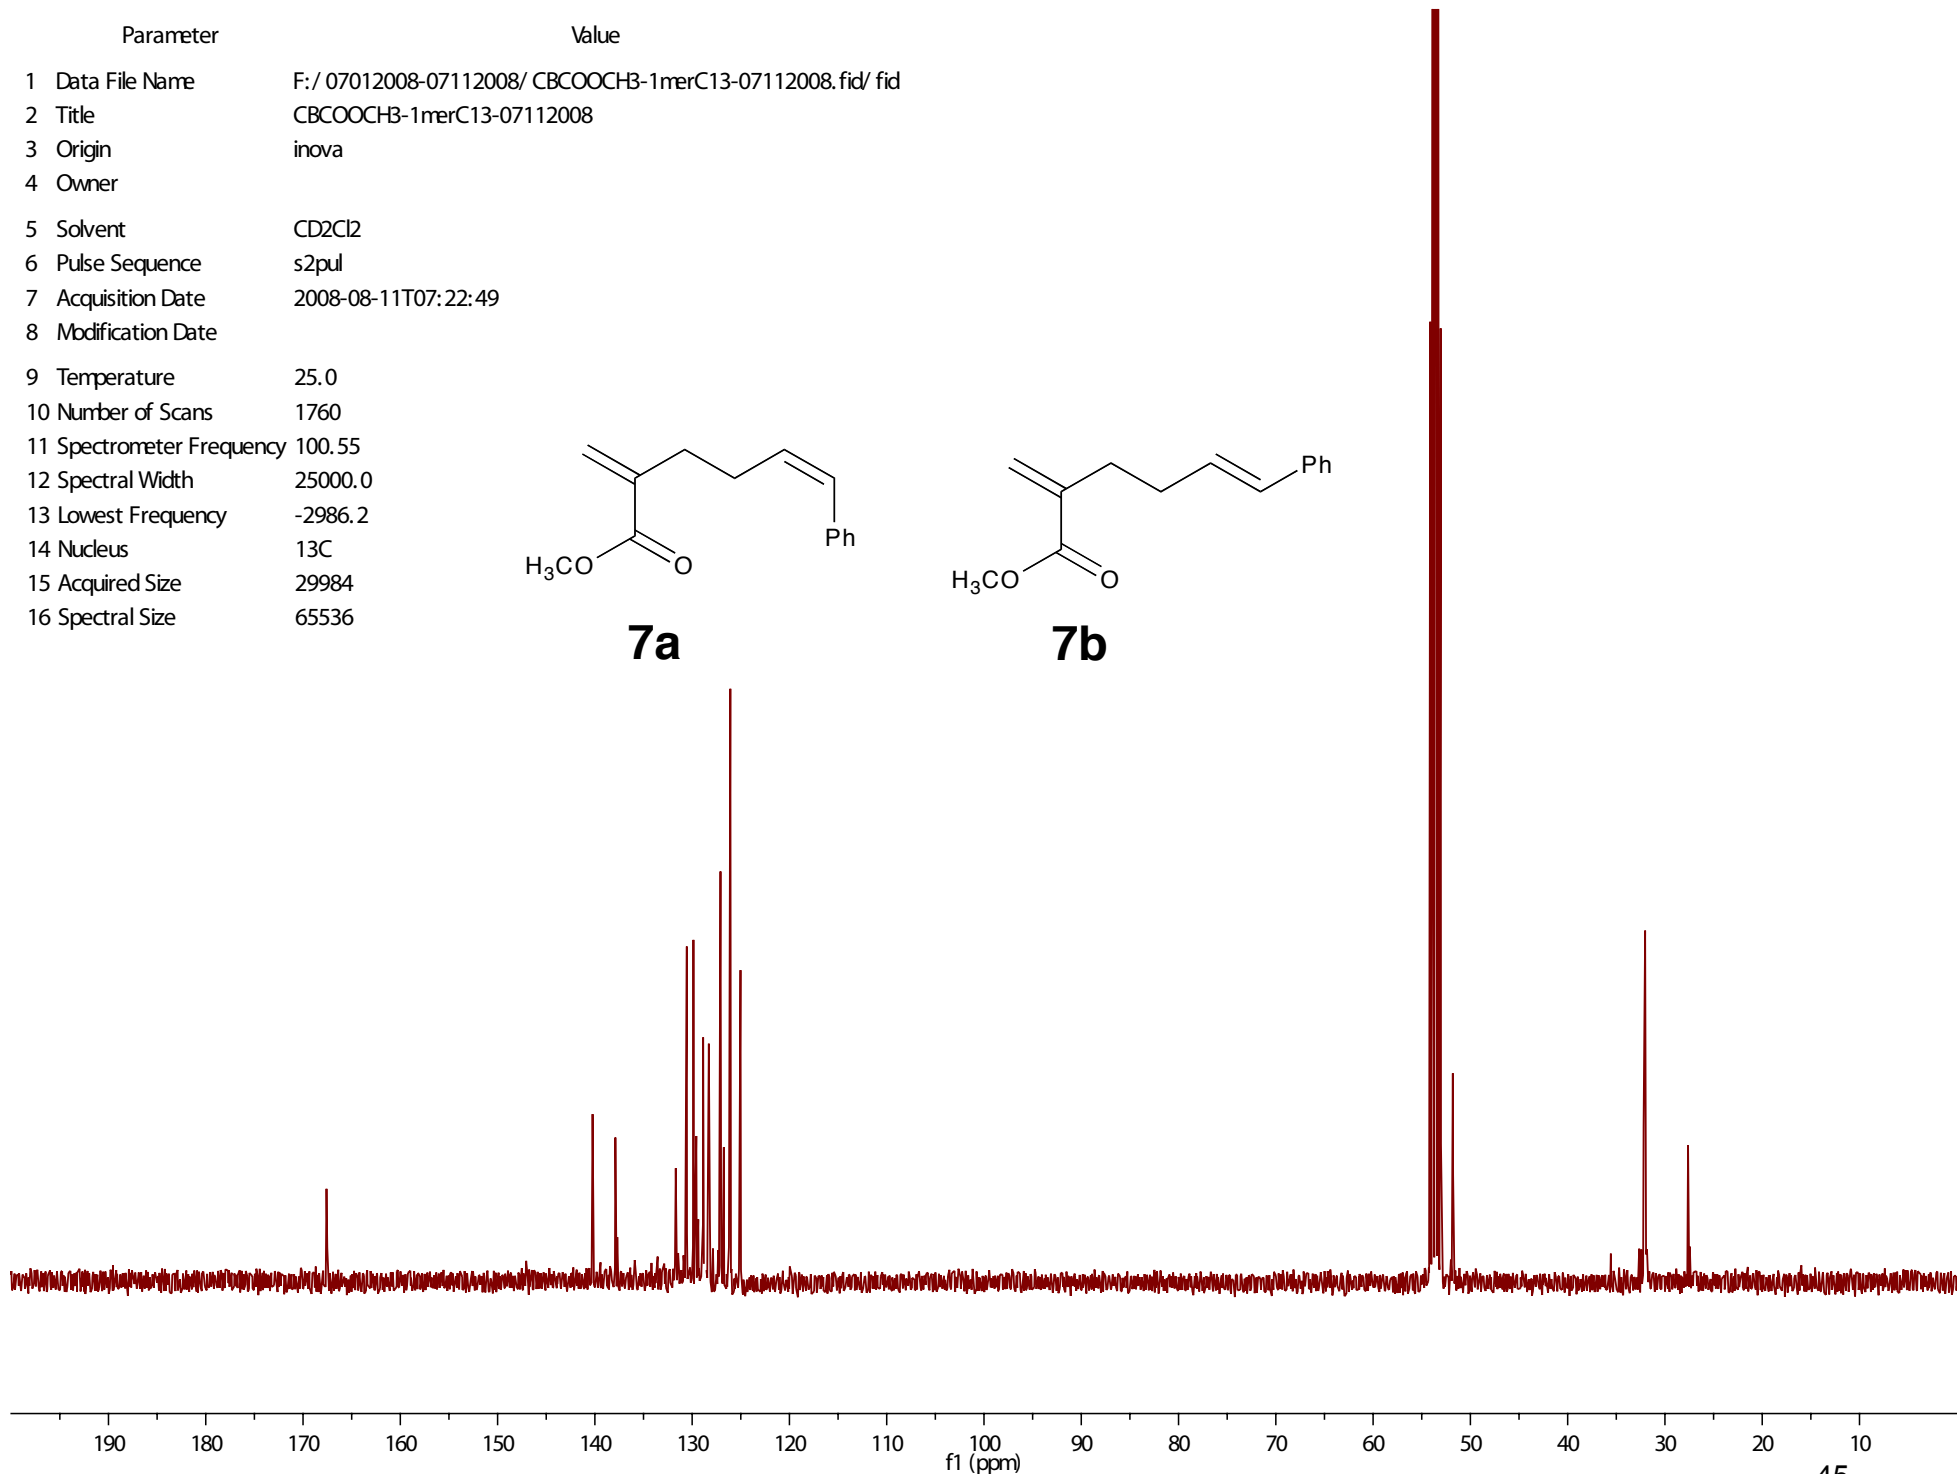

| Parameter                 | Value                                                                            |
|---------------------------|----------------------------------------------------------------------------------|
| 1 Data File Name          | F:/ 07262008-10012008/ 500/ CBCOOCHB-C6D10-benzoquinone20merA1-09032008.fid/ fid |
| 2 Title                   | STANDARD PROTON PARAMETERS                                                       |
| 3 Origin                  | inova                                                                            |
| 4 Owner                   |                                                                                  |
| 5 Solvent                 | CDCl3                                                                            |
| 6 Pulse Sequence          | s2pul                                                                            |
| 7 Acquisition Date        | 2008-10-03T05:39:42                                                              |
| 8 Modification Date       |                                                                                  |
| 9 Temperature             | 25.0                                                                             |
| 10 Number of Scans        | 136                                                                              |
| 11 Spectrometer Frequency | 499.90                                                                           |
| 12 Spectral Width         | 8003.2                                                                           |
| 13 Lowest Frequency       | -1002.3                                                                          |
| 14 Nucleus                | 1H                                                                               |
| 15 Acquired Size          | 15136                                                                            |
| 16 Spectral Size          | 32768                                                                            |

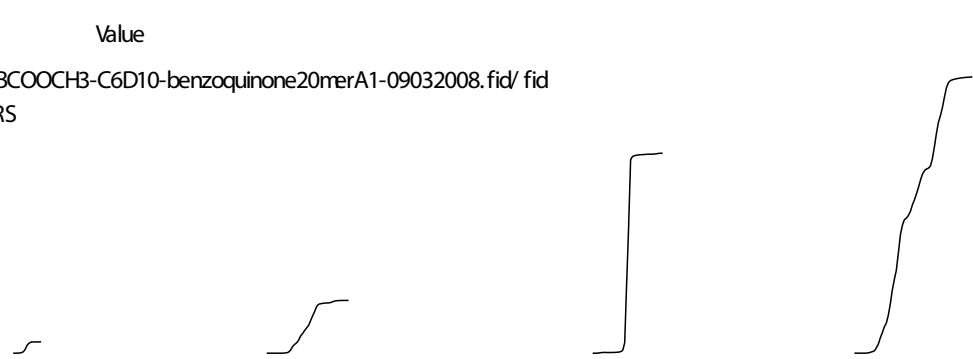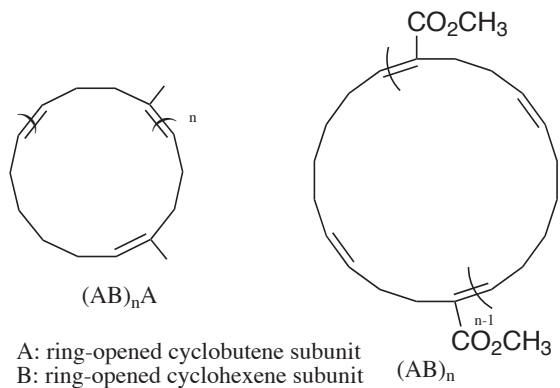

$^1H$ -NMR spectrum of cyclic polymer  $cyc-(2a-4a-D_{10})_{20}$

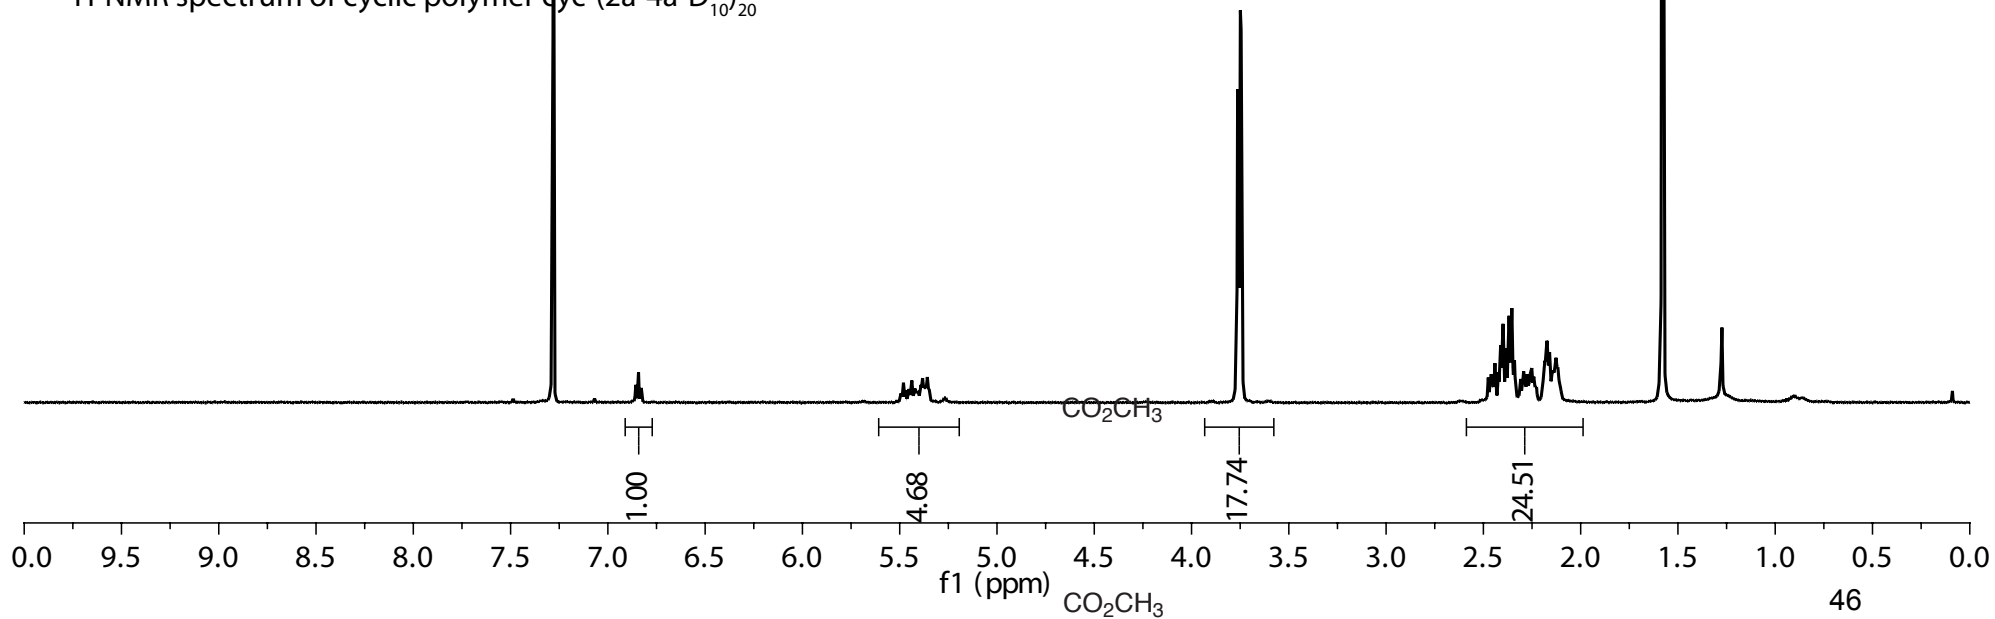

Supplement: NIHMS96663-supplement-1_si_001.pdf [file NIHMS96663-supplement-1_si_001.pdf]
